# Supplementary material for: Novel benzenesulfonamides containing a dual triazole moiety with selective carbonic anhydrase inhibition and anticancer activity
Source: Royal Society of Chemistry journal article supplement (doi:10.1039/d4md00617h), 2024-10-04
Supplement: d4md00617h1.pdf [file d4md00617h1.pdf]

## Supplementary Material

### Novel benzenesulfonamides containing dual triazole moiety with selective carbonic anhydrase inhibition and anticancer activity

Aida Buza <sup>a</sup>, Cüneyt Türkeş <sup>b,\*</sup>, Mustafa Arslan <sup>c,\*</sup>, Yeliz Demir <sup>d</sup>, Busra Dincer <sup>e</sup>, Arleta Rifati Nixha <sup>a,\*</sup>, Şükrü Beydemir <sup>f</sup>

<sup>a</sup> Department of Chemistry, Faculty of Mathematical and Natural Sciences, University of Prishtina, Prishtina 1000, Republic of Kosova

<sup>b</sup> Department of Biochemistry, Faculty of Pharmacy, Erzincan Binali Yıldırım University, Erzincan 24002, Turkey

<sup>c</sup> Department of Chemistry, Faculty of Sciences, Sakarya University, Sakarya 54187, Turkey

<sup>d</sup> Department of Pharmacy Services, Nihat Delibalta Göle Vocational High School, Ardahan University, Ardahan 75700, Turkey

<sup>e</sup> Department of Pharmacology, Faculty of Pharmacy, Ondokuz Mayıs University, Samsun 55020, Turkey

<sup>f</sup> Department of Biochemistry, Faculty of Pharmacy, Anadolu University, Eskişehir 26470, Turkey

---

\* Corresponding authors.

Department of Biochemistry, Faculty of Pharmacy, Erzincan Binali Yıldırım University, Erzincan 24002, Turkey; E-mail: cuneyt.turkes@erzincan.edu.tr; ORCID ID: 0000-0002-2932-2789 (C.Türkeş).

Department of Chemistry, Faculty of Sciences, Sakarya University, Sakarya 54187, Turkey; E-mail: marslan@sakarya.edu.tr; ORCID ID: 0000-0003-0796-4374 (M.Arslan).

Department of Chemistry, Faculty of Mathematical and Natural Sciences, University of Prishtina, Prishtina 1000, Republic of Kosova; E-mail: arleta.rifati@uni-pr.edu; ORCID ID: 0000-0002-8916-0400 (A.R.Nixha).

## Table of Contents

- Table S1.** ADME-related parameters of the novel 1,2,3-triazolyloxime substituted-1,2,3-triazolyl sulfonamide derivatives (**7a-o**) and clinically used reference inhibitor acetazolamide.
- Table S2.** Pharmacokinetic properties of the novel 1,2,3-triazolyloxime substituted-1,2,3-triazolyl sulfonamide derivatives (**7a-o**) and clinically used reference inhibitor acetazolamide.
- Table S3.** Drug-likeness descriptors of the novel 1,2,3-triazolyloxime substituted-1,2,3-triazolyl sulfonamide derivatives (**7a-o**) and clinically used reference inhibitor acetazolamide.
- Table S4.** Medicinal Chemistry pattern recognition methods of the novel 1,2,3-triazolyloxime substituted-1,2,3-triazolyl sulfonamide derivatives (**7a-o**) and clinically used reference inhibitor acetazolamide.
- Fig. S1.** Diagrams showing 'drug-likeness' descriptors for the novel 1,2,3-triazolyloxime substituted-1,2,3-triazolyl sulfonamide derivatives (**7a-o**) and clinically used reference inhibitor acetazolamide. The red-colored zone has been identified as a feasible physicochemical domain to enhance oral bioavailability. LIPO, lipophilicity; SIZE, molecular weight; POLAR, polarity; INSOLU, insolubility; INSATU, saturation; and FLEX, flexibility.
- Fig. S2.** <sup>1</sup>H NMR spectrum (300 MHz, DMSO-*d*<sub>6</sub>) of compound **7a** (4-[5-methyl-4-(1-[(1-phenyl-1*H*-1,2,3-triazol-4-yl)methoxy]imino)ethyl)-1*H*-1,2,3-triazol-1-yl]benzenesulfonamide).
- Fig. S3.** <sup>13</sup>C NMR spectrum (75 MHz, DMSO-*d*<sub>6</sub>) of compound **7a** (4-[5-methyl-4-(1-[(1-phenyl-1*H*-1,2,3-triazol-4-yl)methoxy]imino)ethyl)-1*H*-1,2,3-triazol-1-yl]benzenesulfonamide).
- Fig. S4.** IR spectrum of compound **7a** (4-[5-methyl-4-(1-[(1-phenyl-1*H*-1,2,3-triazol-4-yl)methoxy]imino)ethyl)-1*H*-1,2,3-triazol-1-yl]benzenesulfonamide).
- Fig. S5.** Mass spectrum of compound **7a** (4-[5-methyl-4-(1-[(1-phenyl-1*H*-1,2,3-triazol-4-yl)methoxy]imino)ethyl)-1*H*-1,2,3-triazol-1-yl]benzenesulfonamide).
- Fig. S6.** Lineweaver-Burk plots of compound **7a** (4-[5-methyl-4-(1-[(1-phenyl-1*H*-1,2,3-triazol-4-yl)methoxy]imino)ethyl)-1*H*-1,2,3-triazol-1-yl]benzenesulfonamide).
- Fig. S7.** <sup>1</sup>H NMR spectrum (300 MHz, DMSO-*d*<sub>6</sub>) of compound **7b** (4-[4-(1-[(1-benzyl-1*H*-1,2,3-triazol-4-yl)methoxy]imino)ethyl)-5-methyl-1*H*-1,2,3-triazol-1-yl]benzenesulfonamide).
- Fig. S8.** <sup>13</sup>C NMR spectrum (75 MHz, DMSO-*d*<sub>6</sub>) of compound **7b** (4-[4-(1-[(1-benzyl-1*H*-1,2,3-triazol-4-yl)methoxy]imino)ethyl)-5-methyl-1*H*-1,2,3-triazol-1-yl]benzenesulfonamide).
- Fig. S9.** IR spectrum of compound **7b** (4-[4-(1-[(1-benzyl-1*H*-1,2,3-triazol-4-yl)methoxy]imino)ethyl)-5-methyl-1*H*-1,2,3-triazol-1-yl]benzenesulfonamide).
- Fig. S10.** Mass spectrum of compound **7b** (4-[4-(1-[(1-benzyl-1*H*-1,2,3-triazol-4-yl)methoxy]imino)ethyl)-5-methyl-1*H*-1,2,3-triazol-1-yl]benzenesulfonamide).
- Fig. S11.** Lineweaver-Burk plots of compound **7b** (4-[4-(1-[(1-benzyl-1*H*-1,2,3-triazol-4-yl)methoxy]imino)ethyl)-5-methyl-1*H*-1,2,3-triazol-1-yl]benzenesulfonamide).
- Fig. S12.** <sup>1</sup>H NMR spectrum (300 MHz, DMSO-*d*<sub>6</sub>) of compound **7c** ((*E*)-4-[5-methyl-4-[1-[(1-(*o*-tolyl)-1*H*-1,2,3-triazol-4-yl)methoxy]imino)ethyl]-1*H*-1,2,3-triazol-1-yl]benzenesulfonamide).
- Fig. S13.** <sup>13</sup>C NMR spectrum (75 MHz, DMSO-*d*<sub>6</sub>) of compound **7c** ((*E*)-4-[5-methyl-4-[1-[(1-(*o*-tolyl)-1*H*-1,2,3-triazol-4-yl)methoxy]imino)ethyl]-1*H*-1,2,3-triazol-1-yl]benzenesulfonamide).
- Fig. S14.** IR spectrum of compound **7c** ((*E*)-4-[5-methyl-4-[1-[(1-(*o*-tolyl)-1*H*-1,2,3-triazol-4-yl)methoxy]imino)ethyl]-1*H*-1,2,3-triazol-1-yl]benzenesulfonamide).
- Fig. S15.** Mass spectrum of compound **7c** ((*E*)-4-[5-methyl-4-[1-[(1-(*o*-tolyl)-1*H*-1,2,3-triazol-4-yl)methoxy]imino)ethyl]-1*H*-1,2,3-triazol-1-yl]benzenesulfonamide).
- Fig. S16.** Lineweaver-Burk plots of compound **7c** ((*E*)-4-[5-methyl-4-[1-[(1-(*o*-tolyl)-1*H*-1,2,3-triazol-4-yl)methoxy]imino)ethyl]-1*H*-1,2,3-triazol-1-yl]benzenesulfonamide).
- Fig. S17.** <sup>1</sup>H NMR spectrum (300 MHz, DMSO-*d*<sub>6</sub>) of compound **7d** (4-[4-[1-[(1-(4-hydroxyphenyl)-1*H*-1,2,3-triazol-4-yl)methoxy]imino)ethyl]-5-methyl-1*H*-1,2,3-triazol-1-yl]benzenesulfonamide).
- Fig. S18.** <sup>13</sup>C NMR spectrum (75 MHz, DMSO-*d*<sub>6</sub>) of compound **7d** (4-[4-[1-[(1-(4-hydroxyphenyl)-1*H*-1,2,3-triazol-4-yl)methoxy]imino)ethyl]-5-methyl-1*H*-1,2,3-triazol-1-yl]benzenesulfonamide).
- Fig. S19.** IR spectrum of compound **7d** (4-[4-[1-[(1-(4-hydroxyphenyl)-1*H*-1,2,3-triazol-4-yl)methoxy]imino)ethyl]-5-methyl-1*H*-1,2,3-triazol-1-yl]benzenesulfonamide).
- Fig. S20.** Mass spectrum of compound **7d** (4-[4-[1-[(1-(4-hydroxyphenyl)-1*H*-1,2,3-triazol-4-yl)methoxy]imino)ethyl]-5-methyl-1*H*-1,2,3-triazol-1-yl]benzenesulfonamide).







- Fig. S73.**  $^{13}\text{C}$  NMR spectrum (75 MHz,  $\text{DMSO-}d_6$ ) of compound **7o** (4-{4-[1-({[1-(4-acetylphenyl)-1*H*-1,2,3-triazol-4-yl]methoxy)imino)ethyl]-5-methyl-1*H*-1,2,3-triazol-1-yl}benzenesulfonamide).
- Fig. S74.** IR spectrum of compound **7o** (4-{4-[1-({[1-(4-acetylphenyl)-1*H*-1,2,3-triazol-4-yl]methoxy)imino)ethyl]-5-methyl-1*H*-1,2,3-triazol-1-yl}benzenesulfonamide).
- Fig. S75.** Mass spectrum of compound **7o** (4-{4-[1-({[1-(4-acetylphenyl)-1*H*-1,2,3-triazol-4-yl]methoxy)imino)ethyl]-5-methyl-1*H*-1,2,3-triazol-1-yl}benzenesulfonamide).
- Fig. S76.** Lineweaver-Burk plots of compound **7o** (4-{4-[1-({[1-(4-acetylphenyl)-1*H*-1,2,3-triazol-4-yl]methoxy)imino)ethyl]-5-methyl-1*H*-1,2,3-triazol-1-yl}benzenesulfonamide).

**Table S1.** ADME-related parameters <sup>a</sup> of the novel 1,2,3-triazolyloxime substituted-1,2,3-triazolyl sulfonamide derivatives (**7a-o**) and clinically used reference inhibitor acetazolamide.

| Compound ID      | #stars | #rtvFG | CNS | MW    | Dipole | SASA  | Volume | donorHB | acctptHB | QPlogPC16 | QPlogPoct | QPlogPw | QPlogPo/w | QPlogS | QPPCaco | QPlogBB | QPPMDCK | QPlogKp | #metab | QPlogKhsa | HOA | PSA   | Rule of Five | Rule of Three |
|------------------|--------|--------|-----|-------|--------|-------|--------|---------|----------|-----------|-----------|---------|-----------|--------|---------|---------|---------|---------|--------|-----------|-----|-------|--------------|---------------|
| 7a               | 0      | 0      | -2  | 452.5 | 9.8    | 797.1 | 1385.9 | 2.0     | 11.2     | 16.2      | 26.5      | 18.3    | 1.9       | -5.5   | 42      | -2.8    | 16      | -4.2    | 3      | -0.2      | 54  | 148.2 | 1            | 0             |
| 7b               | 0      | 0      | -2  | 466.5 | 9.9    | 700.5 | 1322.7 | 2.0     | 11.7     | 14.5      | 25.2      | 17.3    | 1.3       | -3.5   | 48      | -2.3    | 19      | -4.2    | 4      | -0.4      | 52  | 148.9 | 1            | 0             |
| 7c               | 0      | 0      | -2  | 466.5 | 6.0    | 810.1 | 1430.9 | 2.0     | 11.2     | 16.2      | 26.2      | 17.9    | 2.2       | -5.7   | 52      | -2.6    | 21      | -4.1    | 4      | -0.4      | 57  | 145.7 | 1            | 1             |
| 7d               | 1      | 0      | -2  | 468.5 | 6.5    | 798.1 | 1400.1 | 3.0     | 12.0     | 16.6      | 27.8      | 20.3    | 1.1       | -5.2   | 13      | -3.4    | 5       | -5.2    | 4      | -0.3      | 41  | 170.3 | 1            | 1             |
| 7e               | 1      | 0      | -2  | 578.4 | 8.4    | 831.8 | 1448.8 | 2.0     | 11.2     | 17.1      | 27.2      | 18.1    | 2.5       | -6.4   | 42      | -2.7    | 47      | -4.3    | 3      | -0.1      | 45  | 148.2 | 2            | 1             |
| 7f               | 1      | 0      | -2  | 531.4 | 6.7    | 827.0 | 1440.4 | 2.0     | 11.2     | 17.0      | 26.8      | 18.0    | 2.4       | -6.3   | 42      | -2.7    | 44      | -4.3    | 3      | -0.3      | 44  | 148.5 | 2            | 1             |
| 7g               | 1      | 0      | -2  | 486.9 | 7.9    | 820.4 | 1429.9 | 2.0     | 11.2     | 16.9      | 26.8      | 18.0    | 2.4       | -6.2   | 43      | -2.6    | 42      | -4.3    | 3      | -0.6      | 57  | 148.0 | 1            | 1             |
| 7h               | 0      | 0      | -2  | 470.5 | 5.4    | 775.5 | 1380.6 | 2.0     | 11.2     | 15.5      | 25.7      | 17.9    | 1.9       | -5.3   | 43      | -2.6    | 26      | -4.3    | 3      | -0.2      | 55  | 147.3 | 1            | 0             |
| 7i               | 0      | 0      | -2  | 470.5 | 8.3    | 806.9 | 1402.8 | 2.0     | 11.2     | 15.8      | 26.5      | 18.1    | 2.1       | -5.9   | 42      | -2.7    | 30      | -4.3    | 3      | -0.1      | 55  | 148.2 | 1            | 1             |
| 7j               | 2      | 0      | -2  | 477.5 | 8.3    | 837.3 | 1453.7 | 2.0     | 12.7     | 17.2      | 27.8      | 19.9    | 1.1       | -6.5   | 9       | -3.8    | 3       | -5.5    | 3      | -0.3      | 37  | 174.5 | 1            | 2             |
| 7k               | 4      | 0      | -2  | 513.9 | 5.3    | 858.7 | 1502.8 | 2.0     | 12.2     | 17.9      | 27.9      | 19.2    | 1.6       | -6.3   | 6       | -4.0    | 4       | -6.1    | 4      | -0.1      | 24  | 192.6 | 2            | 2             |
| 7l               | 4      | 0      | -2  | 512.5 | 6.5    | 854.3 | 1493.5 | 3.0     | 13.0     | 18.0      | 29.5      | 21.5    | 1.1       | -5.6   | 0       | -4.8    | 0       | -7.0    | 4      | -0.5      | 1   | 218.9 | 2            | 1             |
| 7m               | 7      | 0      | -2  | 531.6 | 12.9   | 869.7 | 1524.1 | 4.0     | 15.7     | 18.7      | 34.1      | 25.9    | -0.3      | -5.0   | 2       | -4.8    | 1       | -6.8    | 3      | -0.7      | 4   | 214.0 | 2            | 1             |
| 7n               | 2      | 0      | -2  | 496.5 | 5.5    | 827.7 | 1459.0 | 3.0     | 13.2     | 17.4      | 29.3      | 21.8    | 1.1       | -5.3   | 1       | -4.1    | 0       | -6.2    | 3      | -0.5      | 21  | 197.5 | 1            | 1             |
| 7o               | 2      | 0      | -2  | 494.5 | 10.7   | 862.1 | 1510.3 | 2.0     | 13.2     | 17.4      | 29.0      | 20.1    | 1.3       | -5.7   | 13      | -3.6    | 5       | -5.3    | 3      | -0.3      | 42  | 177.5 | 1            | 2             |
| AAZ <sup>b</sup> | 0      | 0      | -2  | 222.2 | 10.9   | 412.9 | 634.3  | 3.0     | 9.0      | 6.8       | 17.6      | 15.2    | -1.8      | -1.6   | 36      | -1.8    | 24      | -5.9    | 1      | -1.0      | 44  | 133.3 | 0            | 0             |

<sup>a</sup> Various computational pharmacodynamic and pharmacokinetic parameters of synthesized compounds in this research were predicted such as number of property or descriptor values that fall outside the 95% range of similar values for known drugs. (#stars; 0 - 5), number of reactive functional groups (#rtvFG; 0 - 2), central nervous system activity (CNS; -2 inactive, +2 active), molecular weight of the compound (MW; 130.0 - 725.0), computed dipole moment of the compound (Dipole; 1.0 - 12.5), total solvent accessible surface area (SASA; 300.0 - 1000.0), total solvent-accessible volume in cubic angstroms using a probe with a 1.4 Å Radius (Volume; 500.0 - 2000.0), number of hydrogen bonds that would be donated by the solute to water molecules in an aqueous solution (donorHB; 0.0 - 6.0), number of hydrogen bonds that would be accepted by the solute from water molecules in an aqueous solution (acctptHB; 2.0 - 20.0), hexadecane/gas partition coefficient (QPlogPC16; 4.0 - 18.0), octanol/gas partition coefficient (QPlogPoct; 8.0 - 35.0), water/gas partition coefficient (QPlogPw; 4.0 - 45.0), octanol/water partition coefficient (QPlogPo/w; -2.0 - 6.5), aqueous solubility (QPlogS; -6.5 - 0.5), apparent Caco-2 cell permeability in nm/sec (QPPCaco; <25 poor, great>500), brain/blood partition coefficient (QPlogBB; -3.0 - 1.2), apparent MDCK cell permeability in nm/sec (QPPMDCK; <25 poor, great>500), skin permeability (QPlogKp; -8.0 - -1.0), number of likely metabolic reactions (#metab; 1 - 8), prediction of binding to human serum albumin (QPlogKhsa; -1.5 - 1.5), human oral absorption (HOA; <25% poor, high>80%), van der Waals surface area of polar nitrogen and oxygen atoms (PSA; 7.0 - 200.0), number of violations of Lipinski's rule of five (max. 4), and number of violations of Jorgensen's rule of three (max. 3).

<sup>b</sup> Acetazolamide.

**Table S2.** Pharmacokinetic properties <sup>a</sup> of the novel 1,2,3-triazolyloxime substituted-1,2,3-triazolyl sulfonamide derivatives (**7a-o**) and clinically used reference inhibitor acetazolamide.

| Compounds ID            | GI absorption | BBB permeant | P-gp substrate | CYP inhibitor |         |        |        |        |
|-------------------------|---------------|--------------|----------------|---------------|---------|--------|--------|--------|
|                         |               |              |                | CYP1A2        | CYP2C19 | CYP2C9 | CYP2D6 | CYP3A4 |
| <b>7a</b>               | Low           | No           | Yes            | No            | No      | No     | No     | Yes    |
| <b>7b</b>               | Low           | No           | Yes            | No            | No      | No     | No     | Yes    |
| <b>7c</b>               | Low           | No           | No             | No            | No      | Yes    | No     | Yes    |
| <b>7d</b>               | Low           | No           | Yes            | No            | No      | No     | No     | Yes    |
| <b>7e</b>               | Low           | No           | No             | No            | No      | No     | No     | Yes    |
| <b>7f</b>               | Low           | No           | No             | No            | No      | Yes    | No     | Yes    |
| <b>7g</b>               | Low           | No           | No             | No            | No      | Yes    | No     | Yes    |
| <b>7h</b>               | Low           | No           | No             | No            | No      | No     | No     | Yes    |
| <b>7i</b>               | Low           | No           | Yes            | No            | No      | No     | No     | Yes    |
| <b>7j</b>               | Low           | No           | Yes            | No            | No      | Yes    | No     | Yes    |
| <b>7k</b>               | Low           | No           | Yes            | No            | No      | No     | No     | Yes    |
| <b>7l</b>               | Low           | No           | Yes            | No            | No      | No     | No     | Yes    |
| <b>7m</b>               | Low           | No           | Yes            | No            | No      | No     | No     | Yes    |
| <b>7n</b>               | Low           | No           | Yes            | No            | No      | No     | No     | Yes    |
| <b>7o</b>               | Low           | No           | Yes            | No            | No      | Yes    | No     | Yes    |
| <b>AAZ</b> <sup>b</sup> | Low           | No           | No             | No            | No      | No     | No     | No     |

<sup>a</sup> Various pharmacokinetic parameters, such as the GI absorption, human gastrointestinal absorption; BBB permeant, blood-brain barrier permeation; P-gp substrate, prediction of being substrate or non-substrate of P-glycoprotein; CYP inhibitor, prediction of being inhibitor or non-inhibitor of cytochromes P450 (CYP) five major isoforms (CYP1A2, CYP2C19, CYP2C9, CYP2D6, CYP3A4); and log  $K_p$ , prediction of the skin permeability coefficient of targeted compounds in this research, were predicted using SwissADME platform.

<sup>b</sup> Acetazolamide.

**Table S3.** Drug-likeness descriptors <sup>a</sup> of the novel 1,2,3-triazolyloxime substituted-1,2,3-triazolyl sulfonamide derivatives (**7a-o**) and clinically used reference inhibitor acetazolamide.

| Compounds ID            | Ghose                         | Veber                        | Egan                           | Muegge                                 | Bioavailability Score |
|-------------------------|-------------------------------|------------------------------|--------------------------------|----------------------------------------|-----------------------|
| <b>7a</b>               | Yes                           | No; 1 violation:<br>TPSA>140 | No; 1 violation:<br>TPSA>131.6 | No; 1 violation:<br>TPSA>150           | 0.55                  |
| <b>7b</b>               | Yes                           | No; 1 violation:<br>TPSA>140 | No; 1 violation:<br>TPSA>131.6 | No; 1 violation:<br>TPSA>150           | 0.55                  |
| <b>7c</b>               | Yes                           | No; 1 violation:<br>TPSA>140 | No; 1 violation:<br>TPSA>131.6 | No; 1 violation:<br>TPSA>150           | 0.55                  |
| <b>7d</b>               | Yes                           | No; 1 violation:<br>TPSA>140 | No; 1 violation:<br>TPSA>131.6 | No; 1 violation:<br>TPSA>150           | 0.55                  |
| <b>7e</b>               | No; 1 violation:<br>MW>480    | No; 1 violation:<br>TPSA>140 | No; 1 violation:<br>TPSA>131.6 | No; 1 violation:<br>TPSA>150           | 0.17                  |
| <b>7f</b>               | No; 1 violation:<br>MW>480    | No; 1 violation:<br>TPSA>140 | No; 1 violation:<br>TPSA>131.6 | No; 1 violation:<br>TPSA>150           | 0.17                  |
| <b>7g</b>               | No; 1 violation:<br>MW>480    | No; 1 violation:<br>TPSA>140 | No; 1 violation:<br>TPSA>131.6 | No; 1 violation:<br>TPSA>150           | 0.55                  |
| <b>7h</b>               | Yes                           | No; 1 violation:<br>TPSA>140 | No; 1 violation:<br>TPSA>131.6 | No; 1 violation:<br>TPSA>150           | 0.55                  |
| <b>7i</b>               | Yes                           | No; 1 violation:<br>TPSA>140 | No; 1 violation:<br>TPSA>131.6 | No; 1 violation:<br>TPSA>150           | 0.55                  |
| <b>7j</b>               | Yes                           | No; 1 violation:<br>TPSA>140 | No; 1 violation:<br>TPSA>131.6 | No; 1 violation:<br>TPSA>150           | 0.55                  |
| <b>7k</b>               | No; 1 violation:<br>MW>480    | No; 1 violation:<br>TPSA>140 | No; 1 violation:<br>TPSA>131.6 | No; 2 violation:<br>TPSA>150, H-acc>10 | 0.17                  |
| <b>7l</b>               | No; 1 violation:<br>MW>480    | No; 1 violation:<br>TPSA>140 | No; 1 violation:<br>TPSA>131.6 | No; 2 violation:<br>TPSA>150, H-acc>10 | 0.55                  |
| <b>7m</b>               | No; 1 violation:<br>MW>480    | No; 1 violation:<br>TPSA>140 | No; 1 violation:<br>TPSA>131.6 | No; 2 violation:<br>TPSA>150, H-acc>10 | 0.17                  |
| <b>7n</b>               | No; 1 violation:<br>MW>480    | No; 1 violation:<br>TPSA>140 | No; 1 violation:<br>TPSA>131.6 | No; 2 violation:<br>TPSA>150, H-acc>10 | 0.11                  |
| <b>7o</b>               | No; 1 violation:<br>MW>480    | No; 1 violation:<br>TPSA>140 | No; 1 violation:<br>TPSA>131.6 | No; 1 violation:<br>TPSA>150           | 0.55                  |
| <b>AAZ</b> <sup>b</sup> | No; 1 violation:<br>#atoms<20 | No; 1 violation:<br>TPSA>140 | No; 1 violation:<br>TPSA>131.6 | No; 2 violations:<br>TPSA>150, #C<5    | 0.55                  |

<sup>a</sup> Drug-likeness parameters, such as the Ghose (Amgen), Veber (GSK), Egan (Pharmacia), and Muegge (Bayer) methods and bioavailability score (Abbot) of targeted compounds in this research, were predicted using SwissADME platform.

<sup>b</sup> Acetazolamide.

**Table S4.** Medicinal Chemistry pattern recognition methods <sup>a</sup> of the novel 1,2,3-triazolyloxime substituted-1,2,3-triazolyl sulfonamide derivatives (**7a-o**) and clinically used reference inhibitor acetazolamide.

| Compounds ID            | PAINS   | Brenk   | Lead-likeness                     | SA score |
|-------------------------|---------|---------|-----------------------------------|----------|
| <b>7a</b>               | 0 alert | 2 alert | No; 1 violation: MW>350           | 3.89     |
| <b>7b</b>               | 0 alert | 2 alert | No; 2 violation: MW>350, Rotors>7 | 3.99     |
| <b>7c</b>               | 0 alert | 2 alert | No; 1 violation: MW>350           | 3.99     |
| <b>7d</b>               | 0 alert | 2 alert | No; 1 violation: MW>350           | 3.90     |
| <b>7e</b>               | 0 alert | 3 alert | No; 1 violation: MW>350           | 3.98     |
| <b>7f</b>               | 0 alert | 2 alert | No; 1 violation: MW>350           | 3.89     |
| <b>7g</b>               | 0 alert | 2 alert | No; 1 violation: MW>350           | 3.89     |
| <b>7h</b>               | 0 alert | 2 alert | No; 1 violation: MW>350           | 3.83     |
| <b>7i</b>               | 0 alert | 2 alert | No; 1 violation: MW>350           | 3.84     |
| <b>7j</b>               | 0 alert | 2 alert | No; 1 violation: MW>350           | 3.96     |
| <b>7k</b>               | 0 alert | 3 alert | No; 2 violation: MW>350, Rotors>7 | 3.99     |
| <b>7l</b>               | 0 alert | 3 alert | No; 2 violation: MW>350, Rotors>7 | 3.98     |
| <b>7m</b>               | 0 alert | 2 alert | No; 2 violation: MW>350, Rotors>7 | 4.08     |
| <b>7n</b>               | 0 alert | 2 alert | No; 2 violation: MW>350, Rotors>7 | 3.94     |
| <b>7o</b>               | 0 alert | 2 alert | No; 2 violation: MW>350, Rotors>7 | 4.00     |
| <b>AAZ</b> <sup>b</sup> | 0 alert | 1 alert | No; 1 violation: MW<250           | 3.00     |

<sup>a</sup> Medicinal Chemistry pattern recognition method, such as the PAINS, pan assay interference structure alert filter; Brenk, structural alert filter; Lead-likeness, lead-likeness criteria; and SA score, synthetic accessibility score (ranges from 1, very easy, to 10, very difficult) of targeted compounds in this research, were predicted using SwissADME platform.

<sup>b</sup> Acetazolamide.

<sup>c</sup> Tacrine.

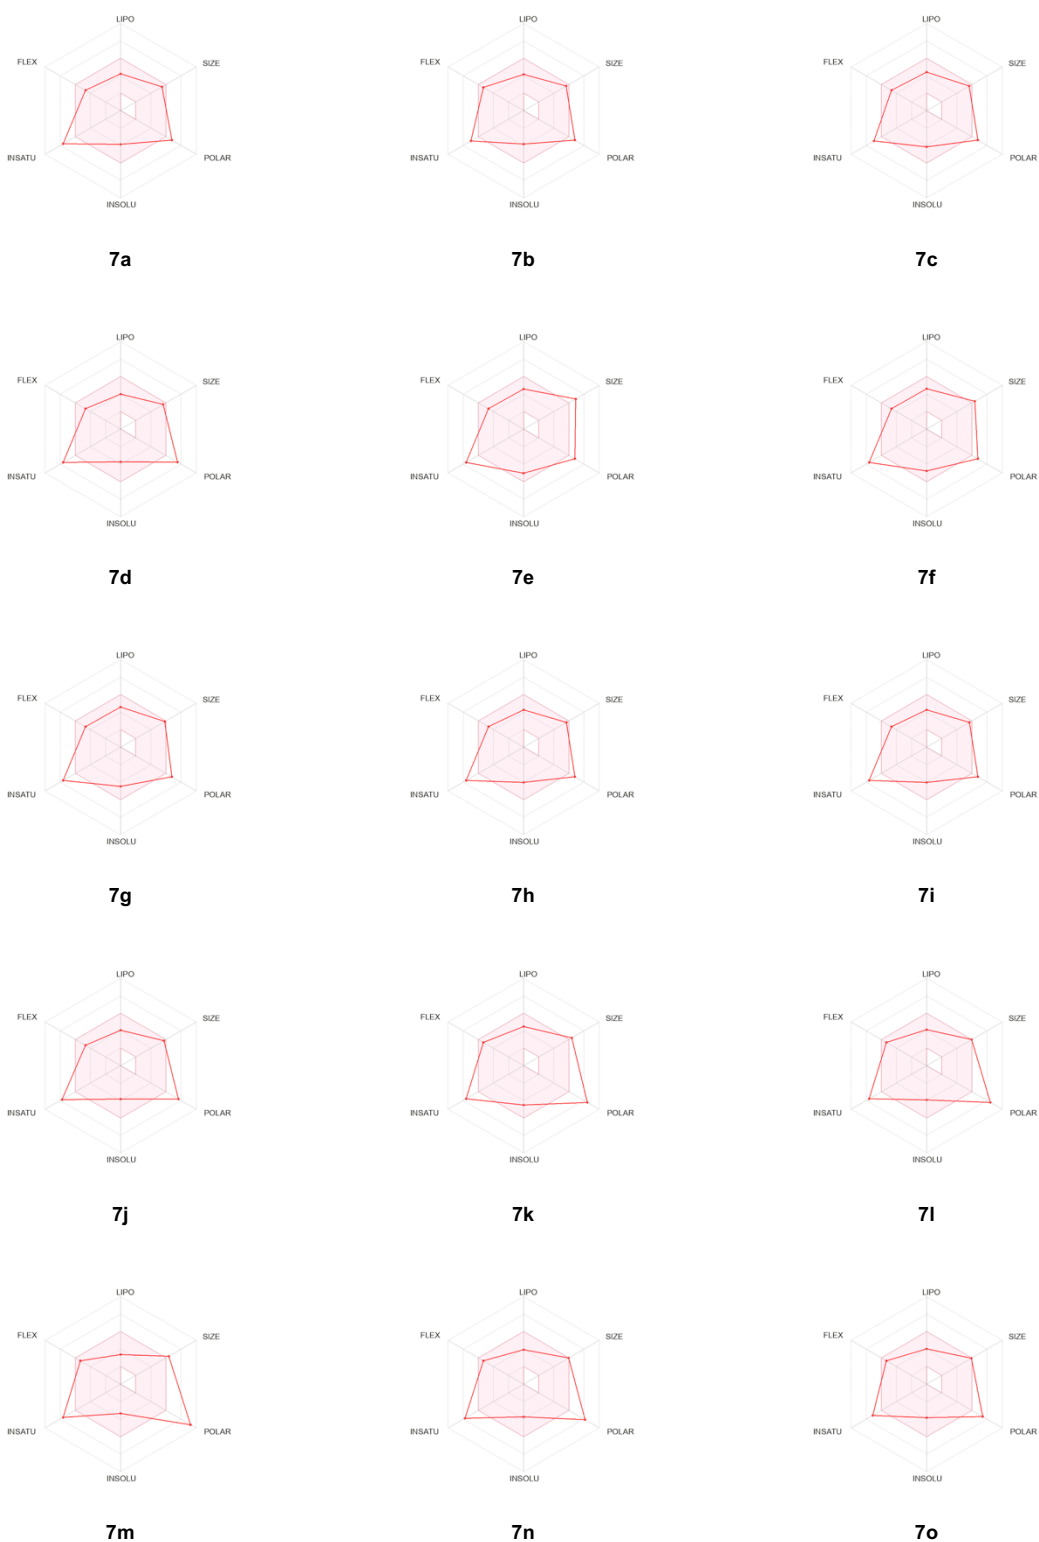

**Fig. S1.** Diagrams showing 'drug-likeness' descriptors for the novel 1,2,3-triazolyloxime substituted-1,2,3-triazolyl sulfonamide derivatives (**7a-o**). The red-colored zone has been identified as a feasible physicochemical domain to enhance oral bioavailability. LIPO, lipophilicity; SIZE, molecular weight; POLAR, polarity; INSOLU, insolubility; INSATU, saturation; and FLEX, flexibility.

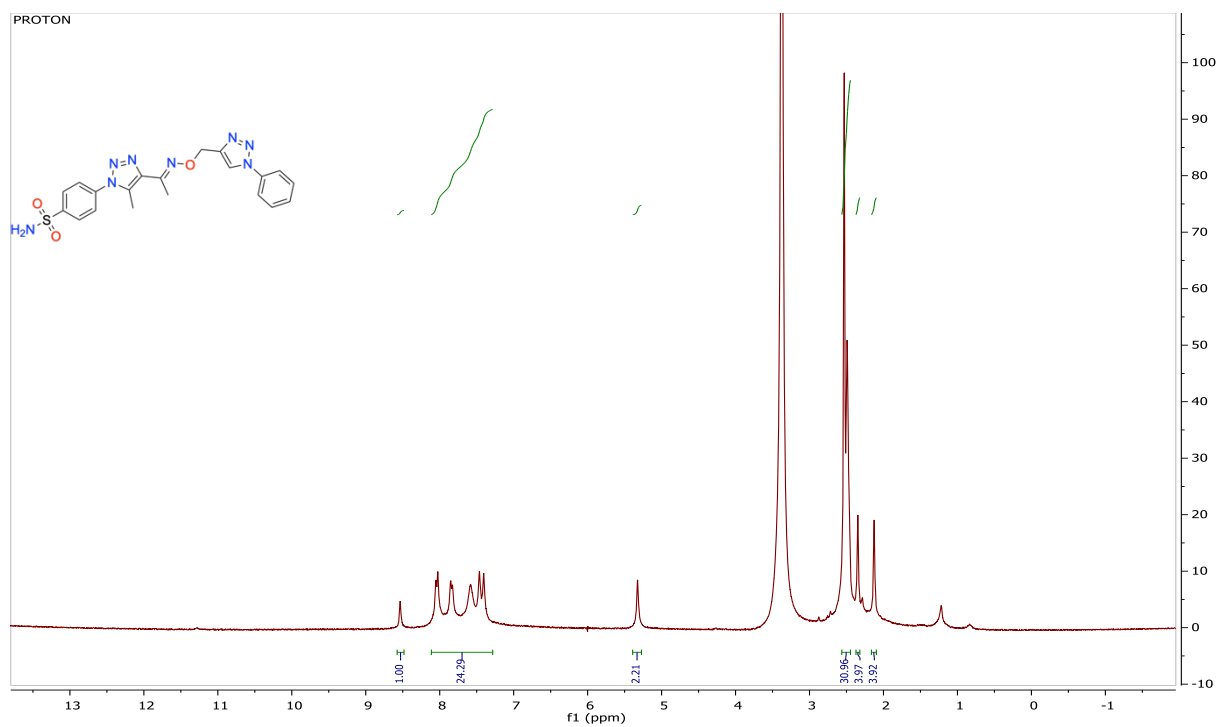

**Fig. S2.** <sup>1</sup>H NMR spectrum (300 MHz, DMSO-*d*<sub>6</sub>) of compound **7a** (4-[5-methyl-4-(1-phenyl-1H-1,2,3-triazol-4-yl)methoxy]imino}ethyl)-1H-1,2,3-triazol-1-yl]benzenesulfonamide).

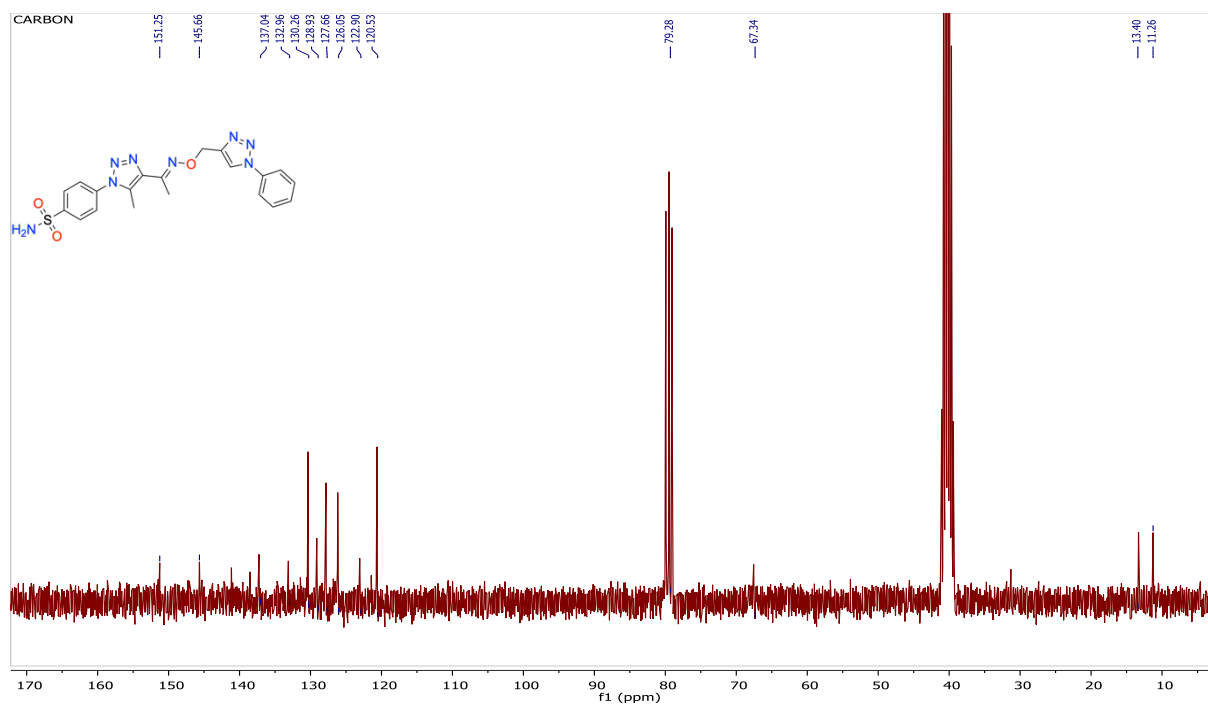

**Fig. S3.**  $^{13}\text{C}$  NMR spectrum (75 MHz,  $\text{DMSO-}d_6$ ) of compound **7a** (4-[5-methyl-4-(1-[(1-phenyl-1*H*-1,2,3-triazol-4-yl)methoxy]imino)ethyl)-1*H*-1,2,3-triazol-1-yl]benzenesulfonamide).



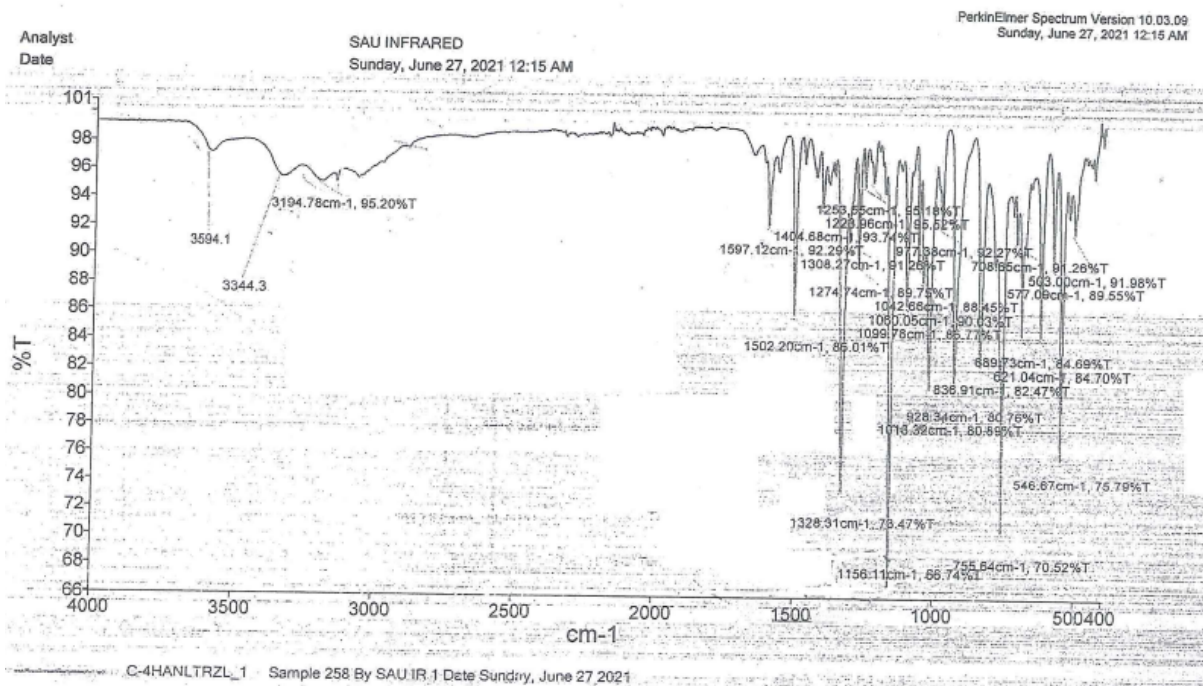

**Fig. S4.** IR spectrum of compound **7a** (4-[5-methyl-4-(1-[(1-phenyl-1*H*-1,2,3-triazol-4-yl)methoxy]imino)ethyl)-1*H*-1,2,3-triazol-1-yl]benzenesulfonamide).

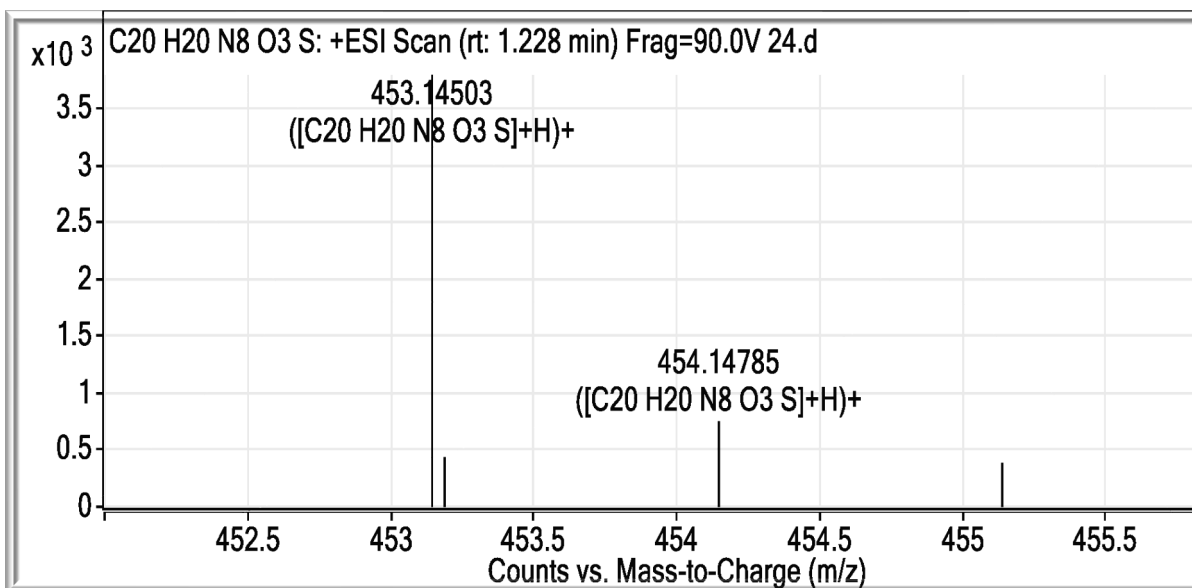

**Fig. S5.** Mass spectrum of compound **7a** (4-[5-methyl-4-(1-[(1-phenyl-1*H*-1,2,3-triazol-4-yl)methoxy]imino)ethyl]-1*H*-1,2,3-triazol-1-yl]benzenesulfonamide).

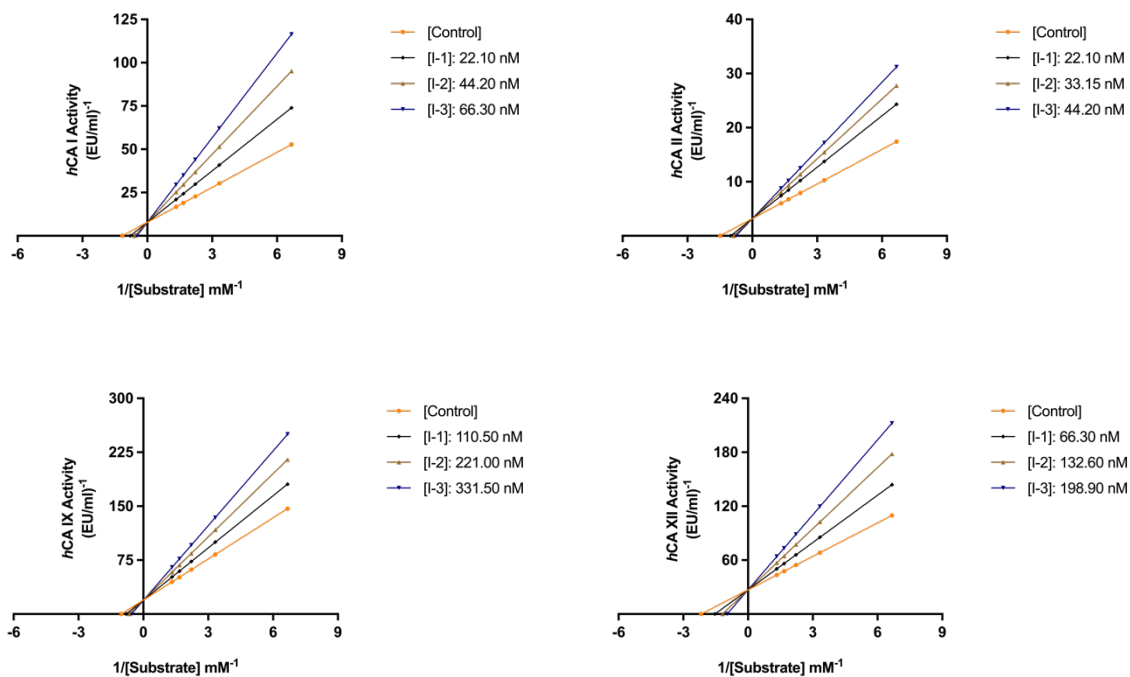

**Fig. S6.** Lineweaver-Burk plots of compound **7a** (4-[5-methyl-4-(1-[(1-phenyl-1*H*-1,2,3-triazol-4-yl)methoxy]imino)ethyl]-1*H*-1,2,3-triazol-1-yl]benzenesulfonamide).

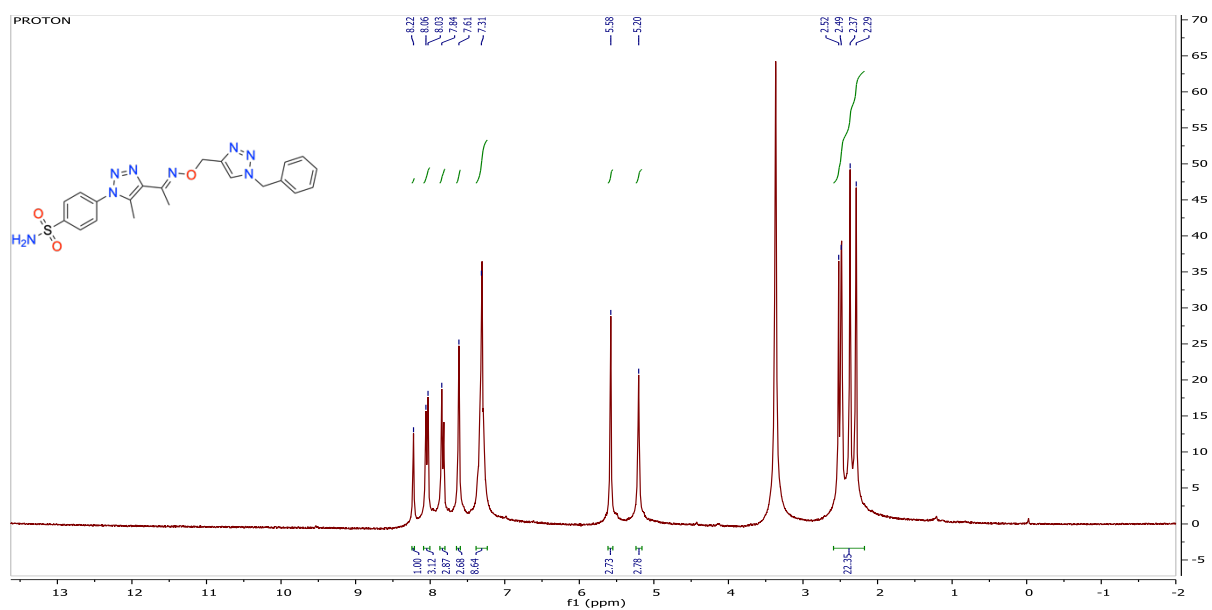

**Fig. S7.**  $^1\text{H}$  NMR spectrum (300 MHz,  $\text{DMSO-}d_6$ ) of compound **7b** (4-[4-(1-[[[(1-benzyl-1*H*-1,2,3-triazol-4-yl)methoxy]imino]ethyl)-5-methyl-1*H*-1,2,3-triazol-1-yl]benzenesulfonamide).

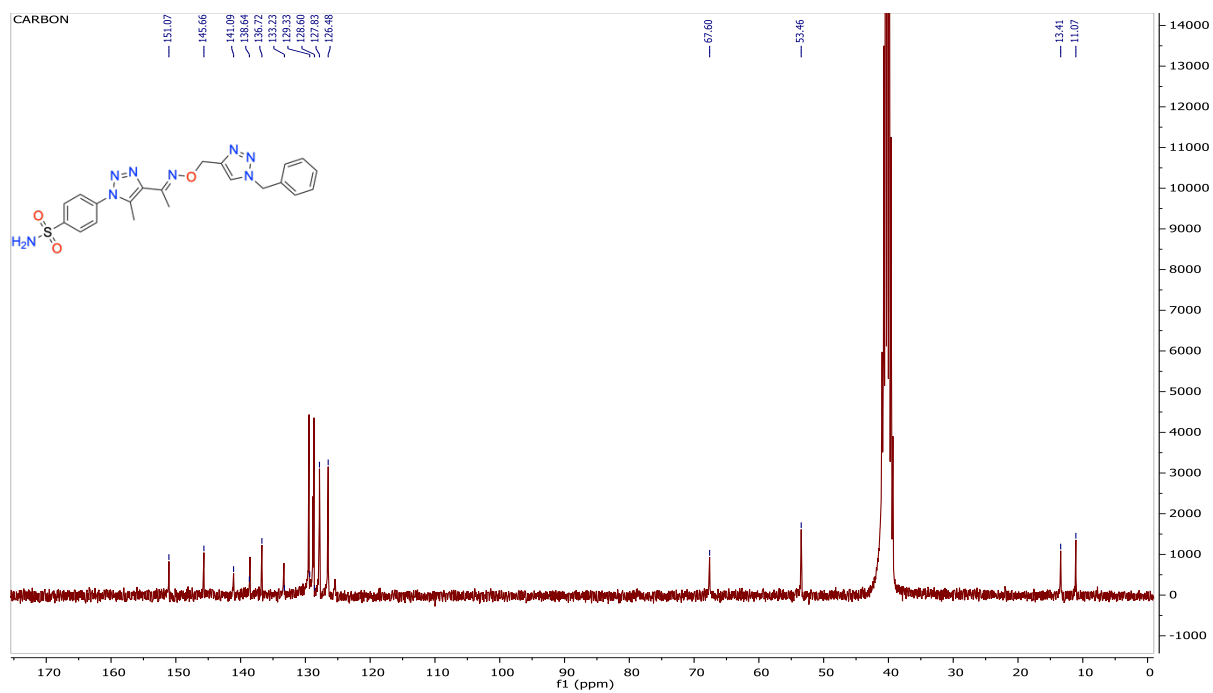

**Fig. S8.**  $^{13}\text{C}$  NMR spectrum (75 MHz,  $\text{DMSO-}d_6$ ) of compound **7b** (4-[4-(1-[[[(1-benzyl-1*H*-1,2,3-triazol-4-yl)methoxy]imino]ethyl)-5-methyl-1*H*-1,2,3-triazol-1-yl]benzenesulfonamide).

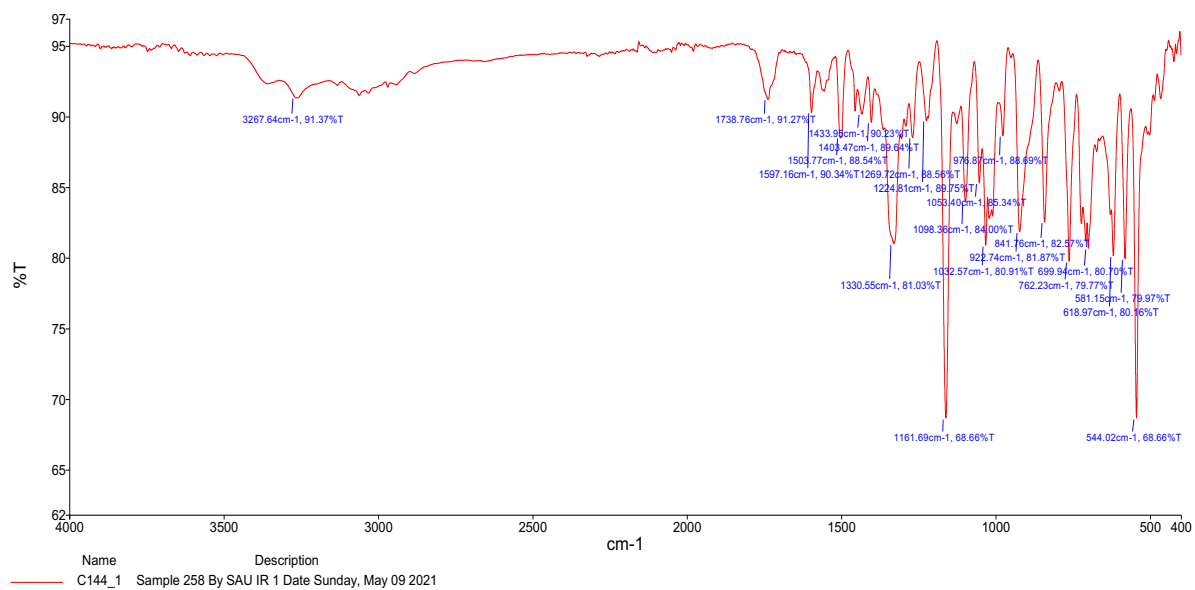

**Fig. S9.** IR spectrum of compound **7b** (4-[4-(1-[(1-benzyl-1*H*-1,2,3-triazol-4-yl)methoxy]imino)ethyl)-5-methyl-1*H*-1,2,3-triazol-1-yl]benzenesulfonamide).

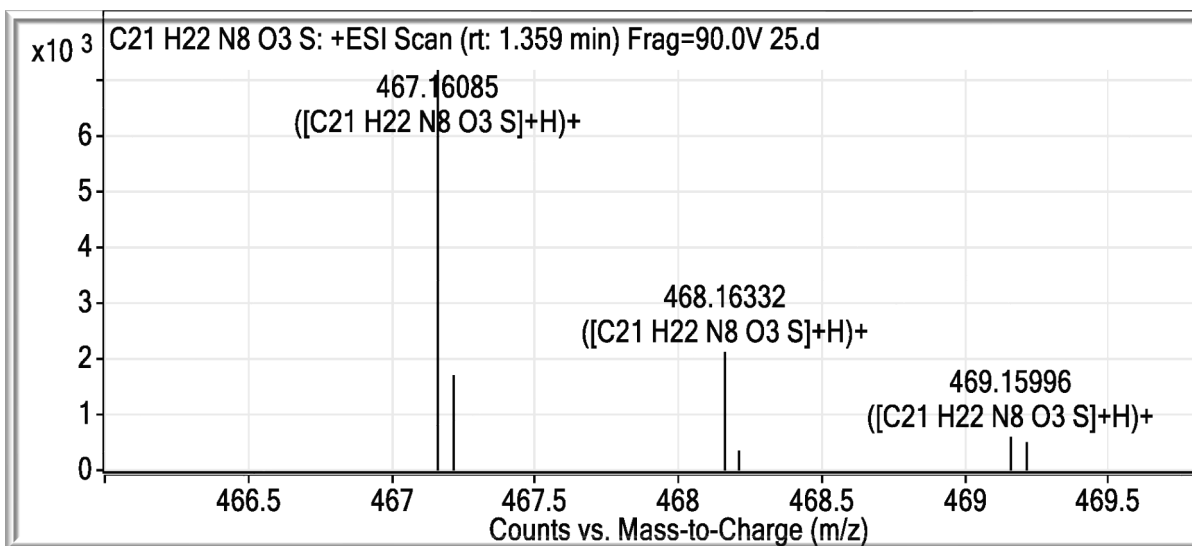

**Fig. S10.** Mass spectrum of compound **7b** (4-[4-(1-[(1-benzyl-1*H*-1,2,3-triazol-4-yl)methoxy]imino)ethyl)-5-methyl-1*H*-1,2,3-triazol-1-yl]benzenesulfonamide).

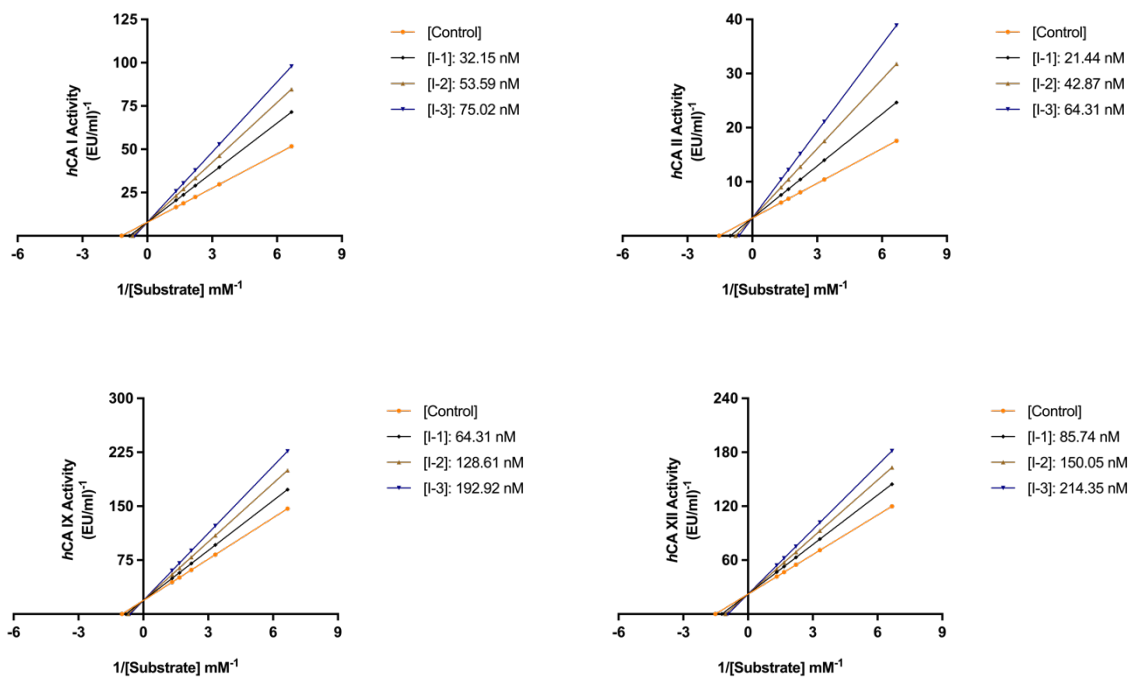

**Fig. S11.** Lineweaver-Burk plots of compound **7b** (4-[4-(1-[(1-benzyl-1*H*-1,2,3-triazol-4-yl)methoxy]imino)ethyl)-5-methyl-1*H*-1,2,3-triazol-1-yl]benzenesulfonamide).



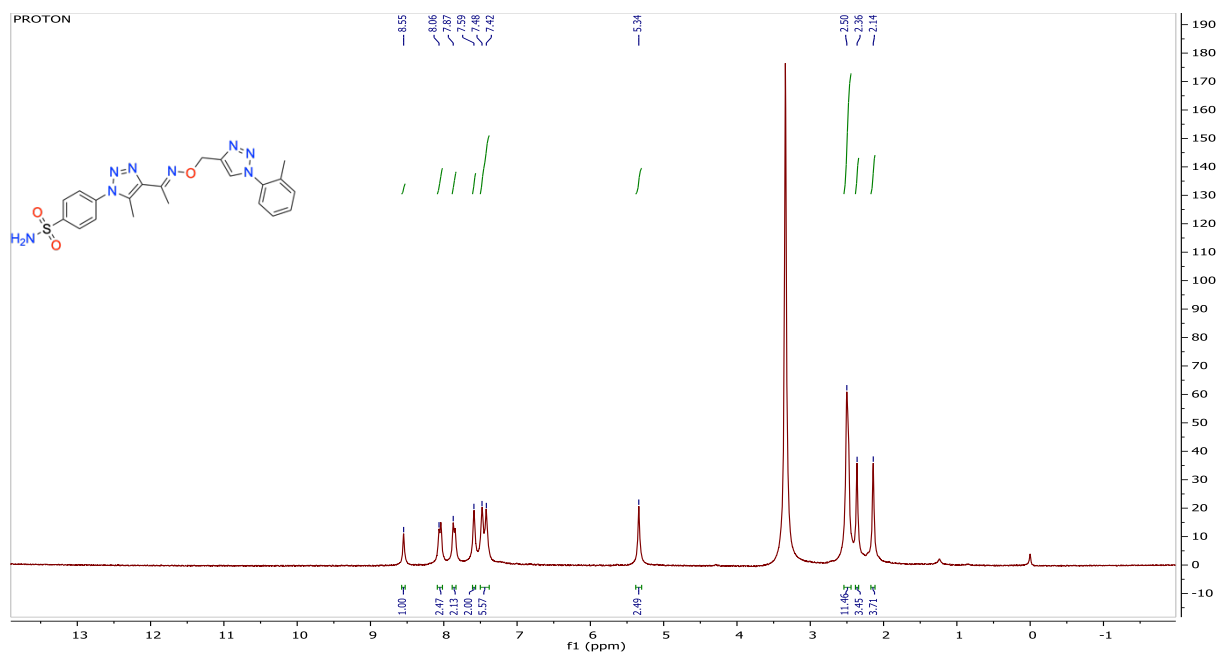

**Fig. S12.**  $^1\text{H}$  NMR spectrum (300 MHz,  $\text{DMSO-}d_6$ ) of compound **7c** (*(E)*-4-[5-methyl-4-[1-[(*o*-tolyl)-1*H*-1,2,3-triazol-4-yl]methoxy]imino]ethyl]-1*H*-1,2,3-triazol-1-yl]benzenesulfonamide).

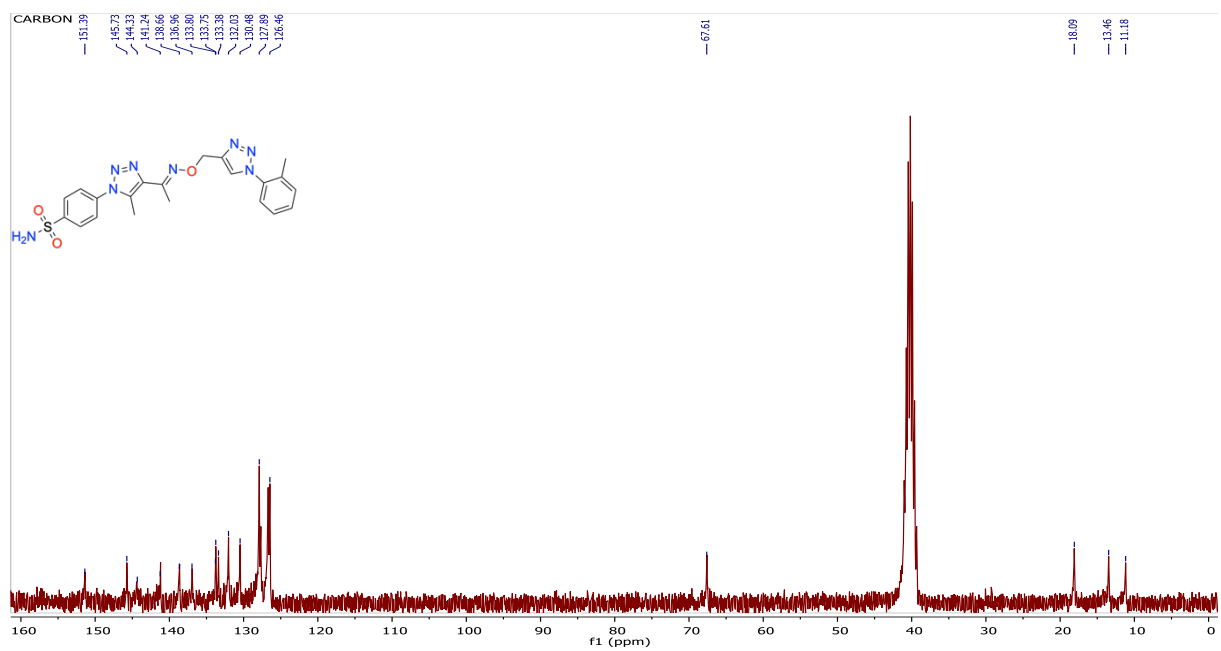

**Fig. S13.**  $^{13}\text{C}$  NMR spectrum (75 MHz,  $\text{DMSO-}d_6$ ) of compound **7c** (*(E)*-4-{5-methyl-4-[1-({1-(*o*-tolyl)-1*H*-1,2,3-triazol-4-yl)]methoxy}imino)ethyl]-1*H*-1,2,3-triazol-1-yl}benzenesulfonamide).

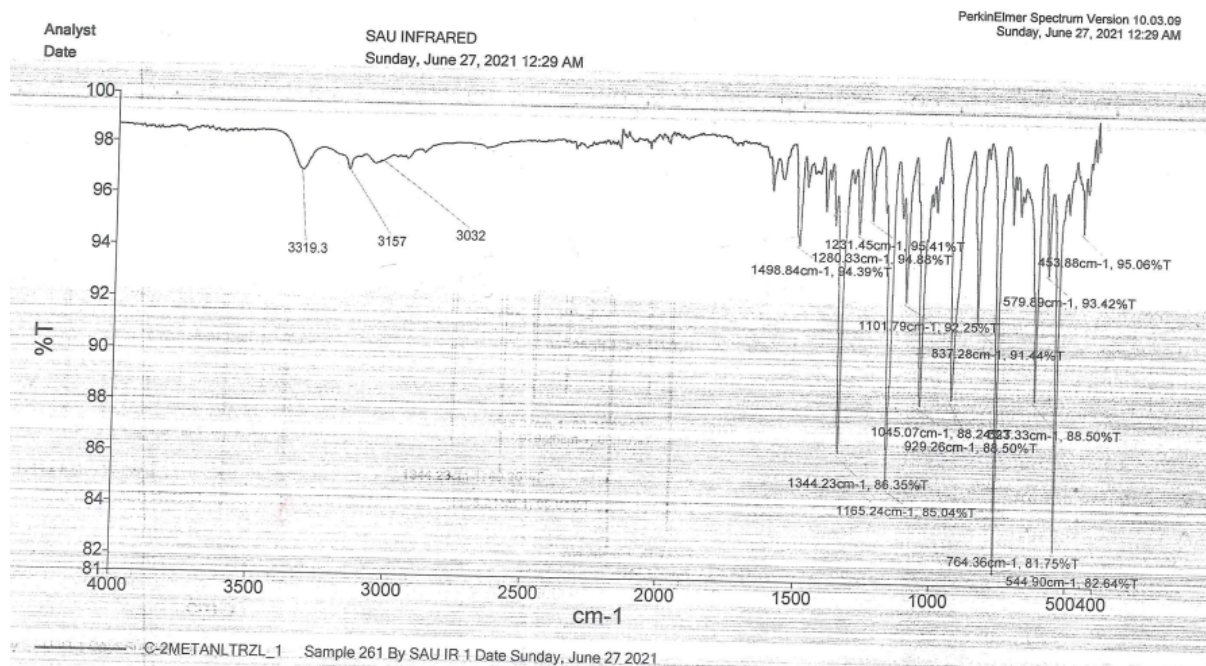

**Fig. S14.** IR spectrum of compound **7c** ((*E*)-4-{5-methyl-4-[1-((1-(*o*-tolyl)-1*H*-1,2,3-triazol-4-yl)methoxy)imino)ethyl]-1*H*-1,2,3-triazol-1-yl}benzenesulfonamide).

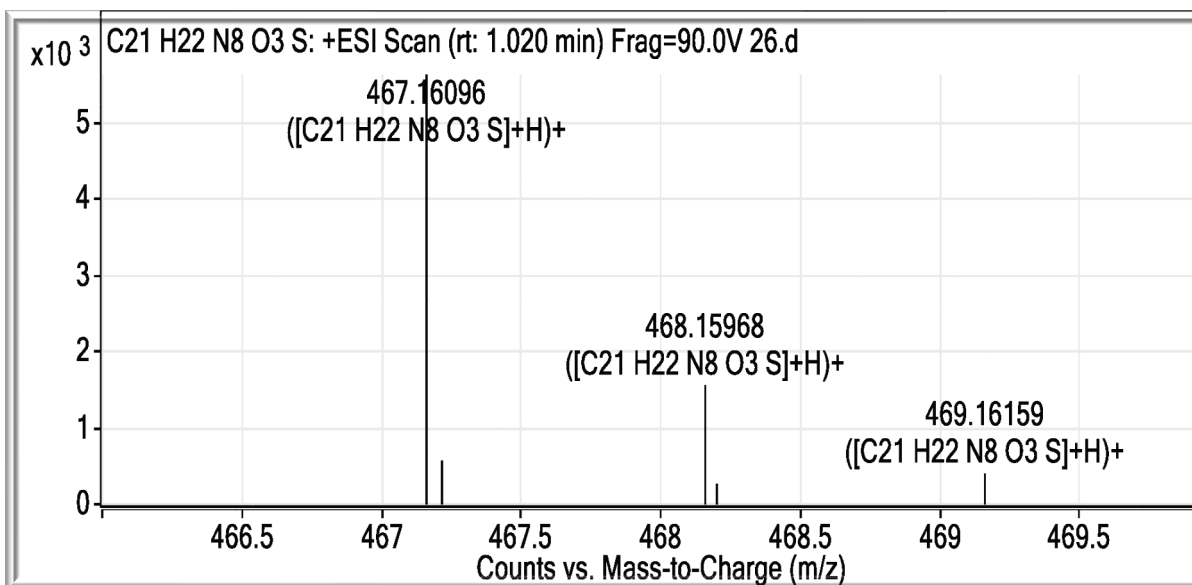

**Fig. S15.** Mass spectrum of compound **7c** ((*E*)-4-{5-methyl-4-[1-({1-(*o*-tolyl)-1*H*-1,2,3-triazol-4-yl]methoxy}imino)ethyl]-1*H*-1,2,3-triazol-1-yl}benzenesulfonamide).

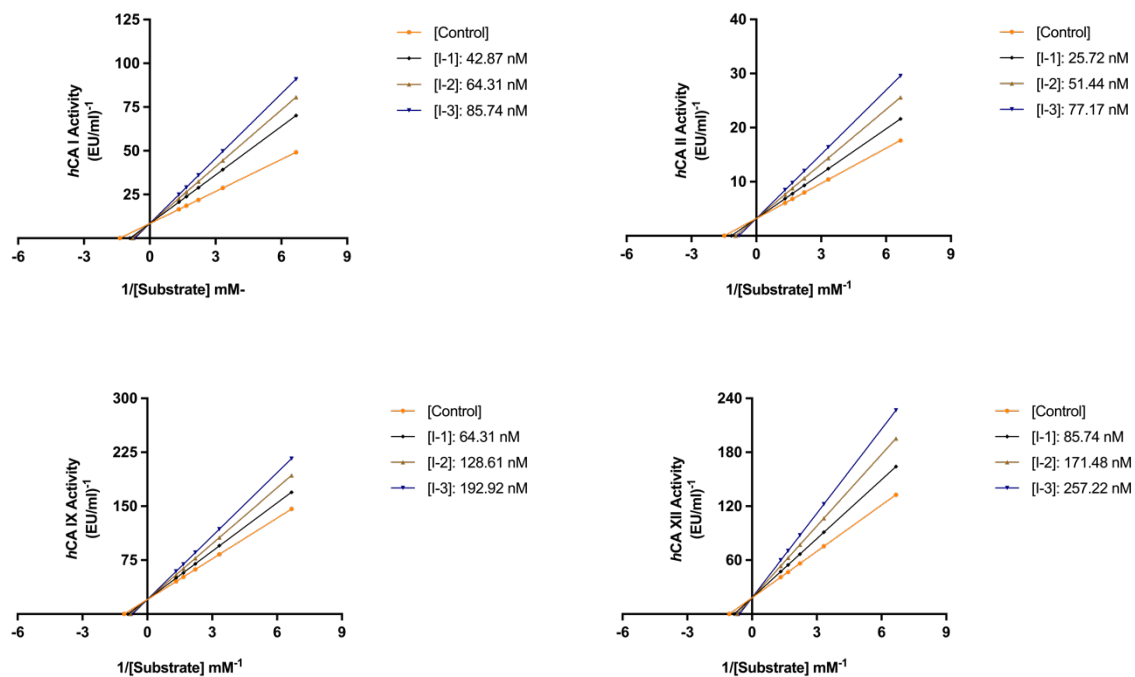

**Fig. S16.** Lineweaver-Burk plots of compound **7c** (*(E)*-4-{5-methyl-4-[1-({1-(*o*-tolyl)-1*H*-1,2,3-triazol-4-yl)methoxy}imino)ethyl]-1*H*-1,2,3-triazol-1-yl}benzenesulfonamide).

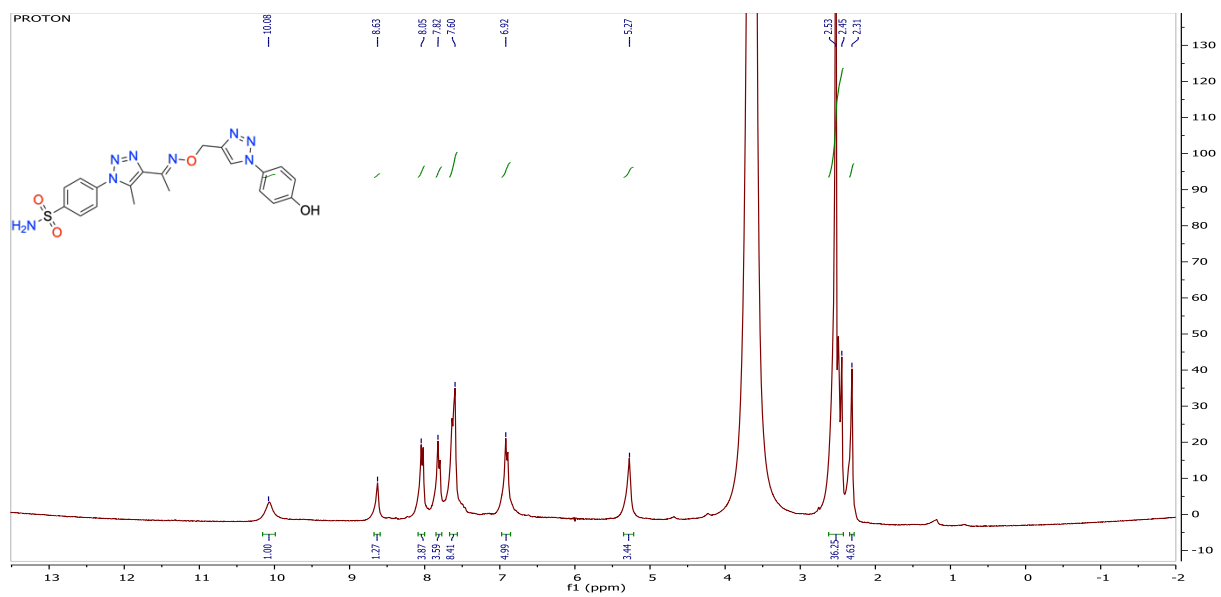

**Fig. S17.**  $^1\text{H}$  NMR spectrum (300 MHz,  $\text{DMSO-}d_6$ ) of compound **7d** (4-{4-[1-[(1-(4-hydroxyphenyl)-1*H*-1,2,3-triazol-4-yl)methoxy]imino)ethyl]-5-methyl-1*H*-1,2,3-triazol-1-yl}benzenesulfonamide).

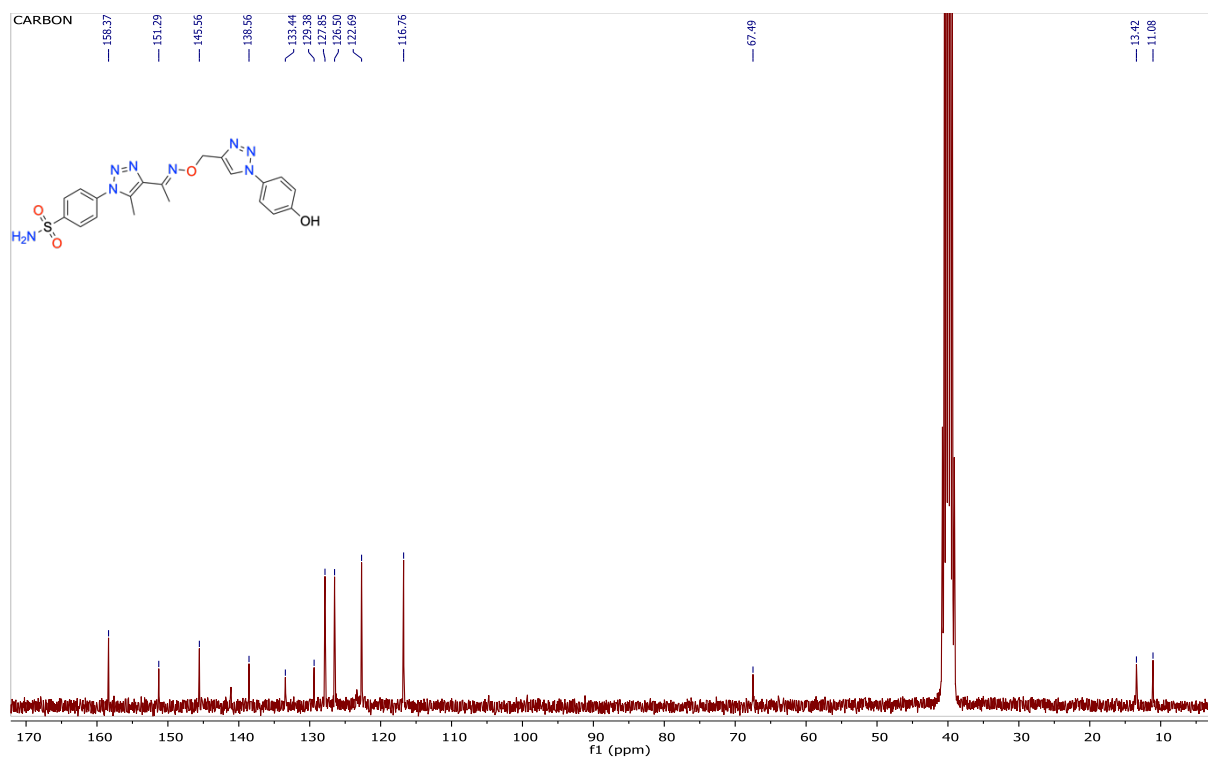

**Fig. S18.**  $^{13}\text{C}$  NMR spectrum (75 MHz,  $\text{DMSO-}d_6$ ) of compound **7d** (4-{4-[1-[(1-(4-hydroxyphenyl)-1*H*-1,2,3-triazol-4-yl]methoxy)imino]ethyl]-5-methyl-1*H*-1,2,3-triazol-1-yl}benzenesulfonamide).

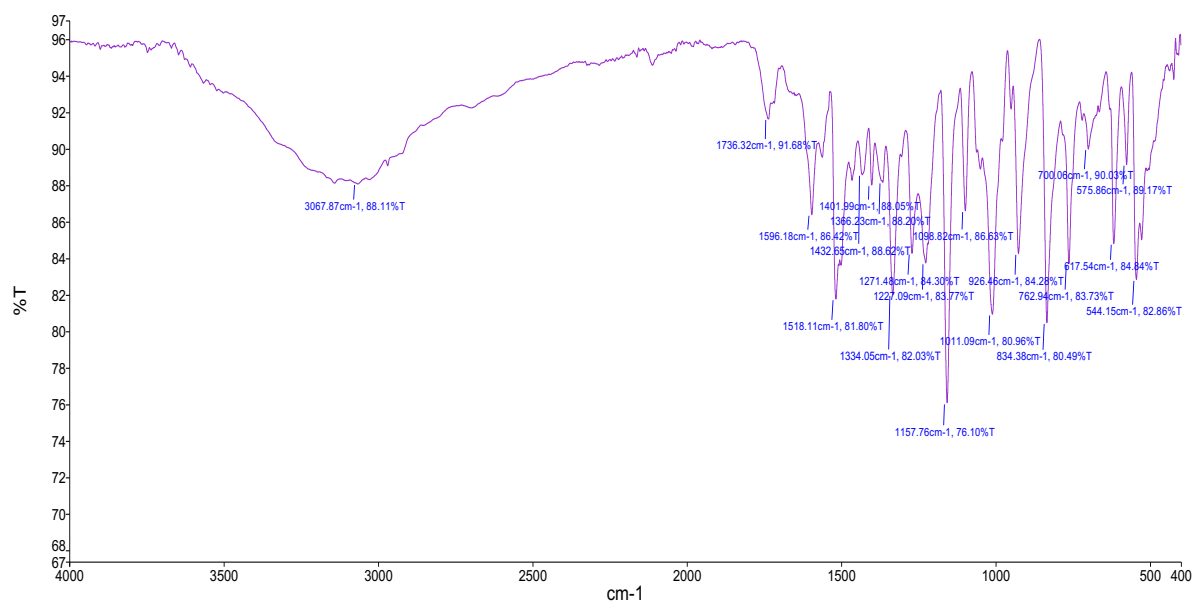

Name: C218\_1  
 Description: Sample 262 By SAU IR 1 Date Sunday, May 09 2021

**Fig. S19.** IR spectrum of compound **7d** (4-{4-[1-[[1-(4-hydroxyphenyl)-1*H*-1,2,3-triazol-4-yl]methoxy]imino)ethyl]-5-methyl-1*H*-1,2,3-triazol-1-yl]benzenesulfonamide).



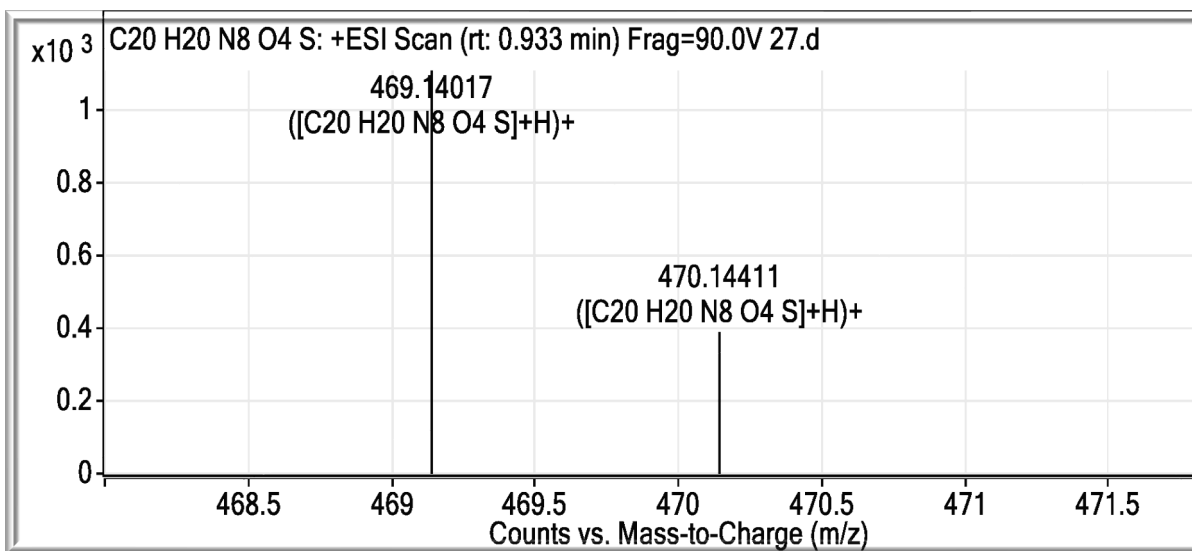

**Fig. S20.** Mass spectrum of compound **7d** (4-{4-[1-[(1-(4-hydroxyphenyl)-1*H*-1,2,3-triazol-4-yl)methoxy]imino)ethyl]-5-methyl-1*H*-1,2,3-triazol-1-yl}benzenesulfonamide).

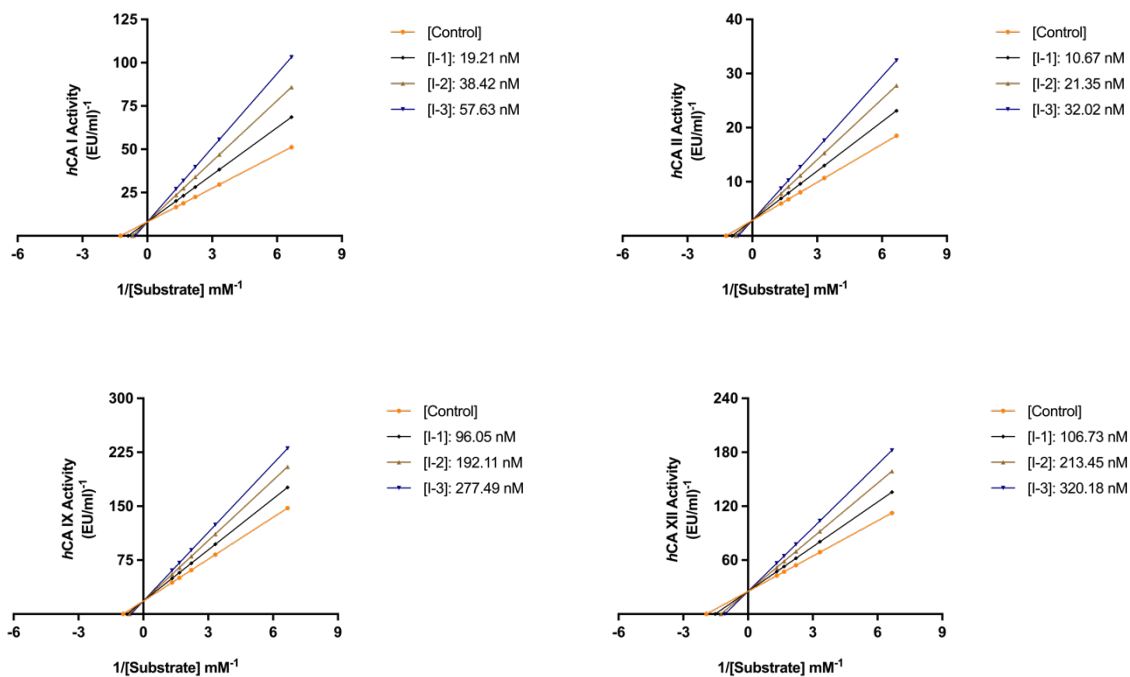

**Fig. S21.** Lineweaver-Burk plots of compound **7d** (4-{4-[1-[(1-(4-hydroxyphenyl)-1*H*-1,2,3-triazol-4-yl)methoxy]imino]ethyl}-5-methyl-1*H*-1,2,3-triazol-1-yl}benzenesulfonamide).

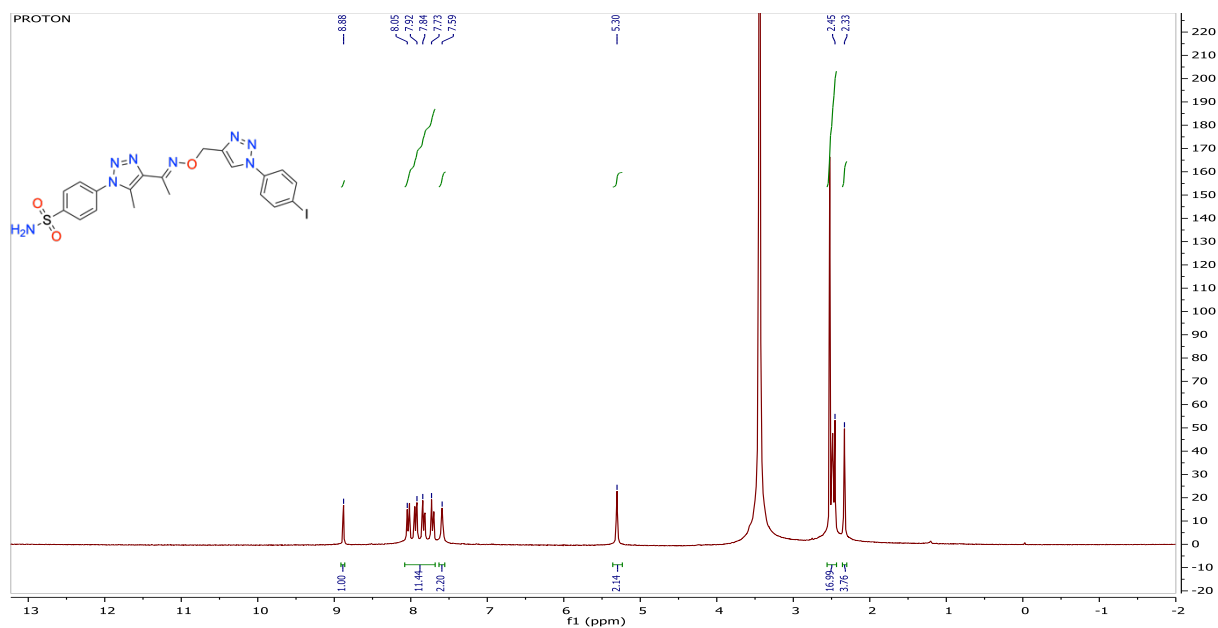

**Fig. S22.**  $^1\text{H}$  NMR spectrum (300 MHz,  $\text{DMSO-}d_6$ ) of compound **7e** (4-{4-[1-({[1-(4-iodophenyl)-1*H*-1,2,3-triazol-4-yl]methoxy)imino]ethyl]-5-methyl-1*H*-1,2,3-triazol-1-yl]benzenesulfonamide).

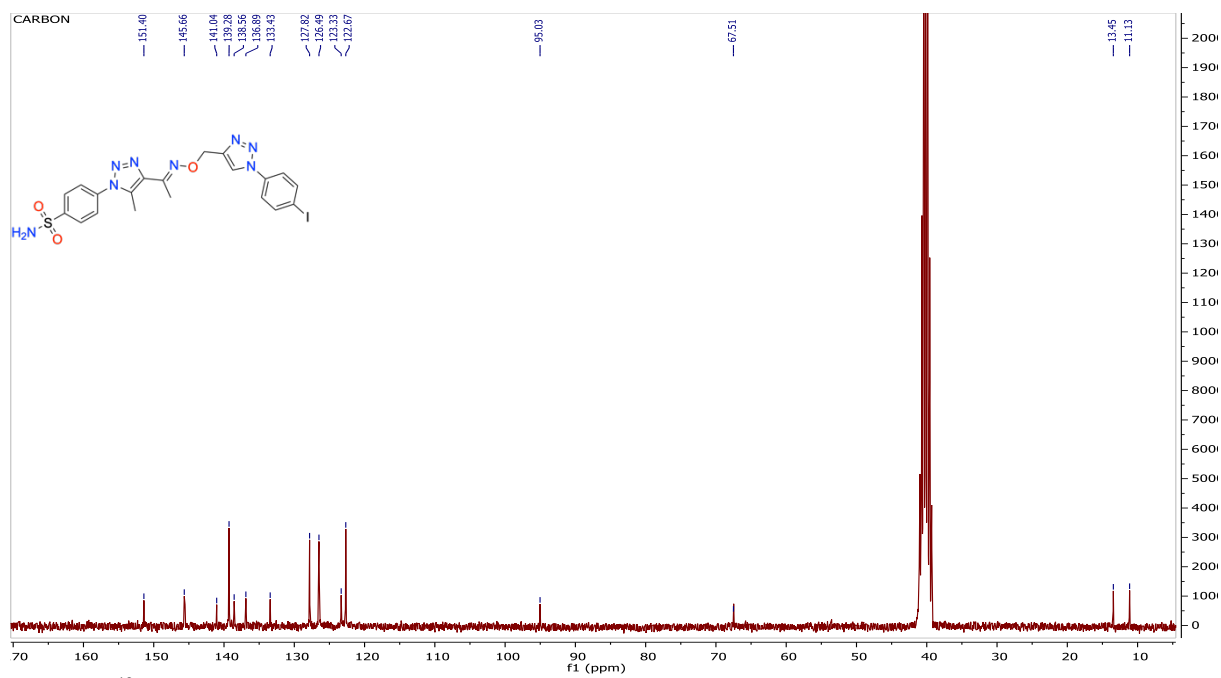

**Fig. S23.**  $^{13}\text{C}$  NMR spectrum (75 MHz,  $\text{DMSO-}d_6$ ) of compound **7e** (4-{4-[1-({1-(4-iodophenyl)-1*H*-1,2,3-triazol-4-yl)methoxy}imino)ethyl]-5-methyl-1*H*-1,2,3-triazol-1-yl}benzenesulfonamide).

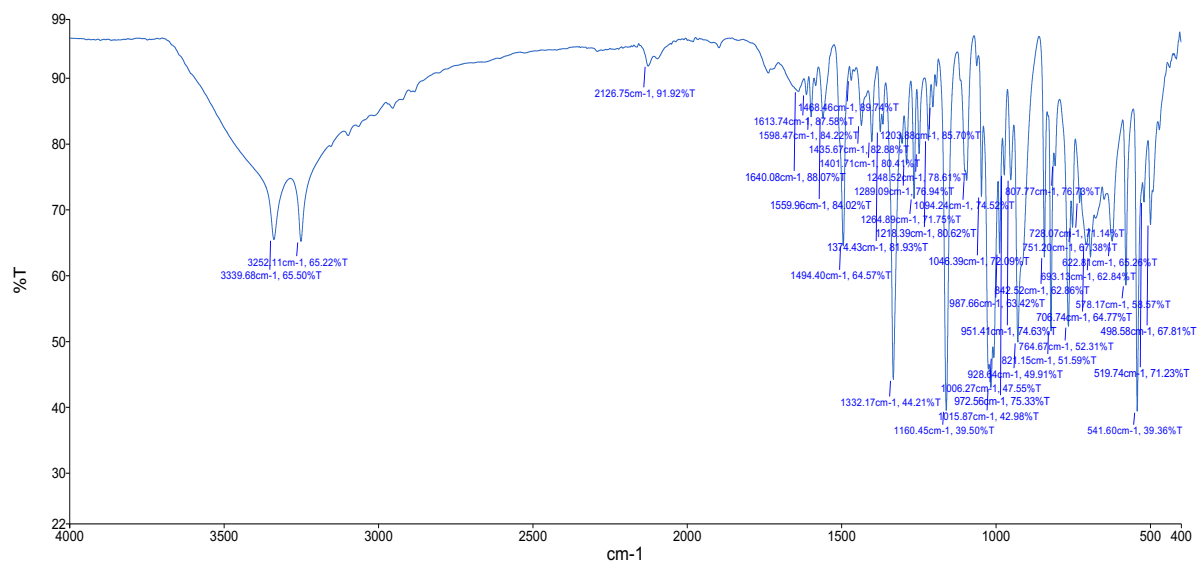

Name: C131\_1  
 Description: Sample 254 By SAU IR 1 Date Sunday, May 09 2021

**Fig. S24.** IR spectrum of compound **7e** (4-{4-[1-({1-(4-iodophenyl)-1*H*-1,2,3-triazol-4-yl)methoxy}imino)ethyl]-5-methyl-1*H*-1,2,3-triazol-1-yl}benzenesulfonamide).

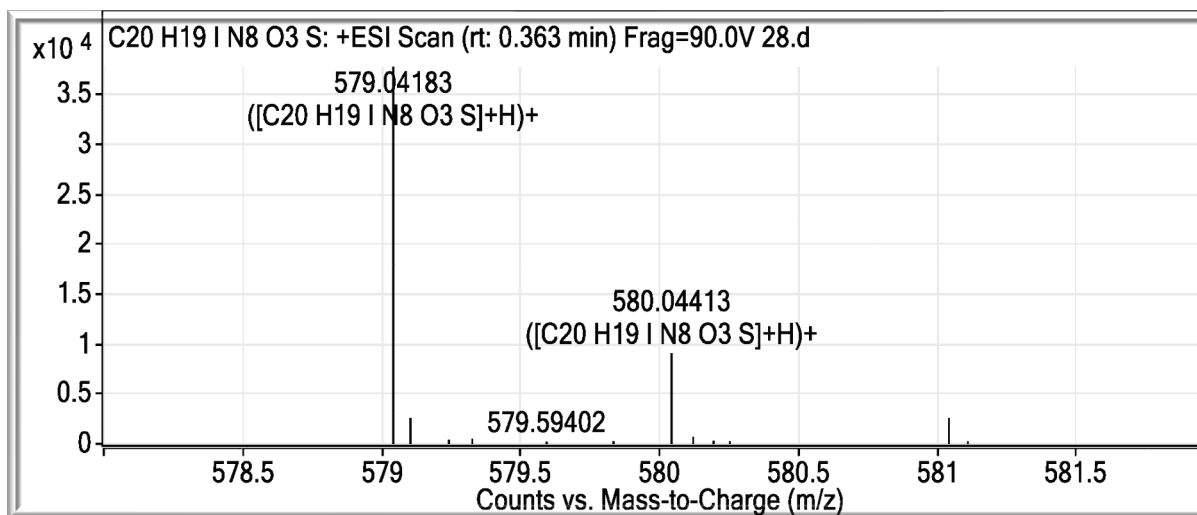

**Fig. S25.** Mass spectrum of compound **7e** (4-{4-[1-({1-(4-iodophenyl)-1*H*-1,2,3-triazol-4-yl)methoxy}imino)ethyl]-5-methyl-1*H*-1,2,3-triazol-1-yl}benzenesulfonamide).

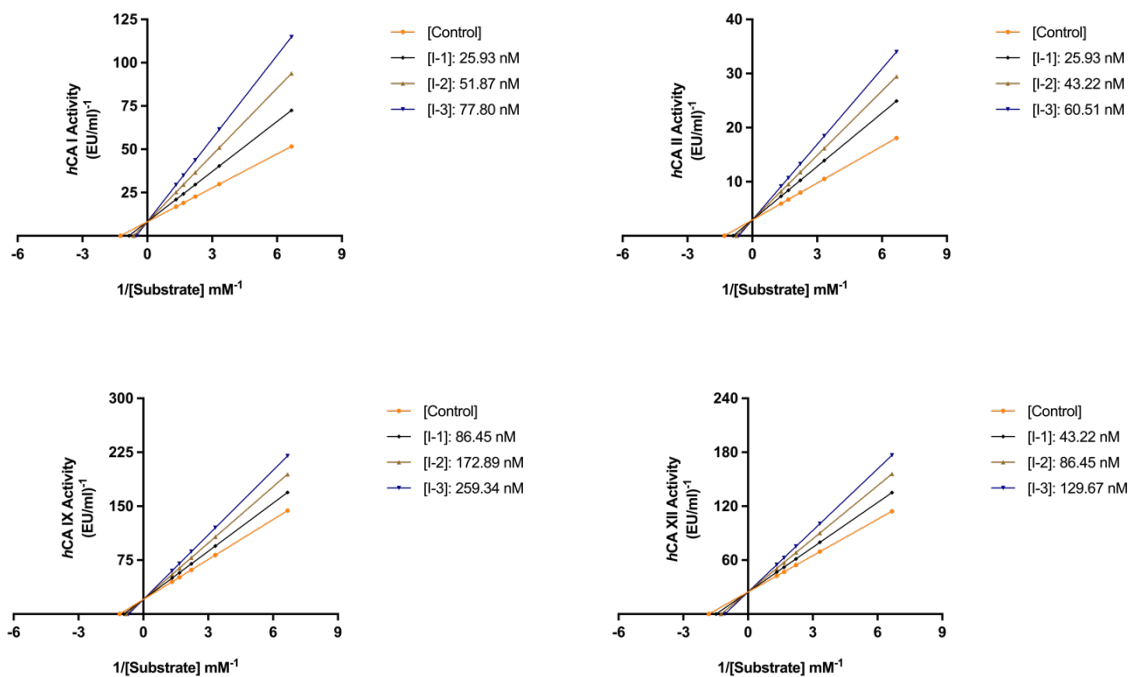

**Fig. S26.** Lineweaver-Burk plots of compound **7e** (4-{4-[1-({[1-(4-iodophenyl)-1*H*-1,2,3-triazol-4-yl]methoxy}imino)ethyl]-5-methyl-1*H*-1,2,3-triazol-1-yl}benzenesulfonamide).

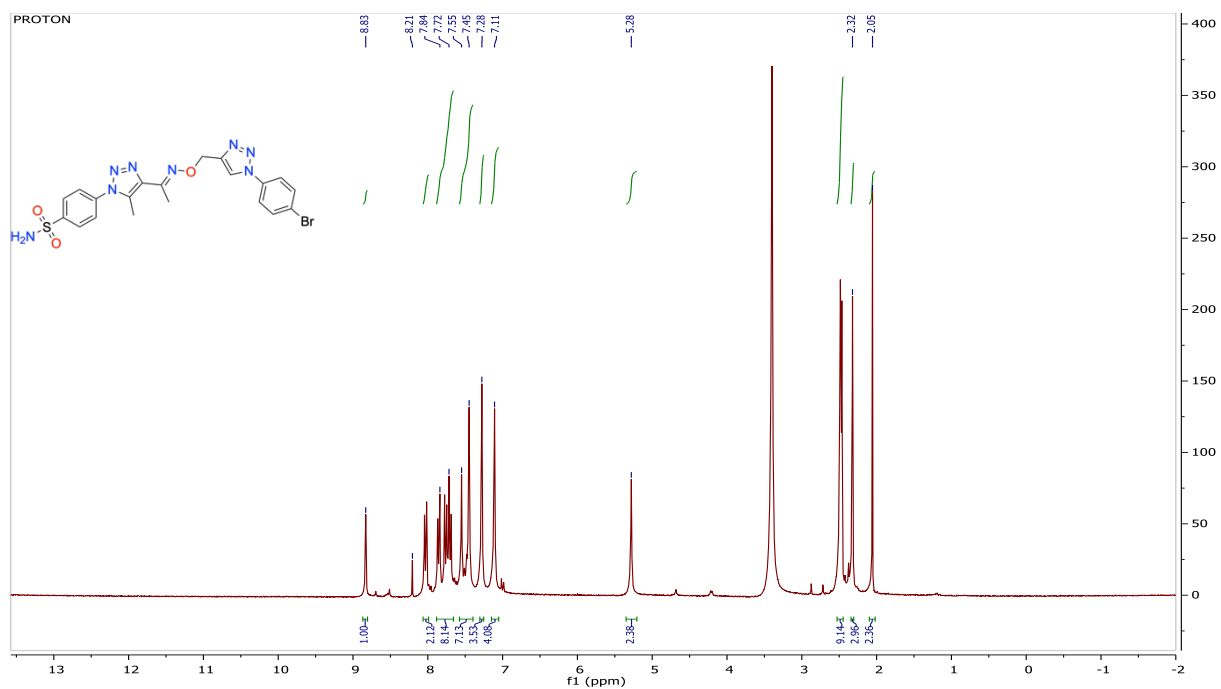

**Fig. S27.**  $^1\text{H}$  NMR spectrum (300 MHz,  $\text{DMSO-}d_6$ ) of compound **7f** (*(E)*-4-{4-[1-({[1-(4-bromophenyl)-1*H*-1,2,3-triazol-4-yl]methoxy}imino)ethyl]-5-methyl-1*H*-1,2,3-triazol-1-yl}benzenesulfonamide).



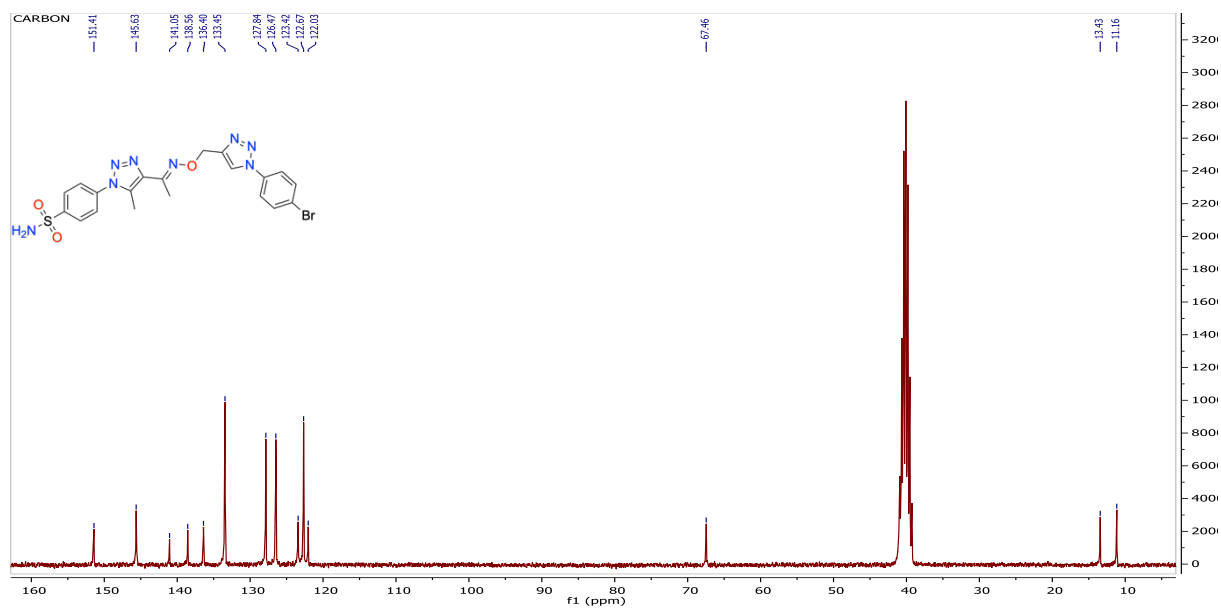



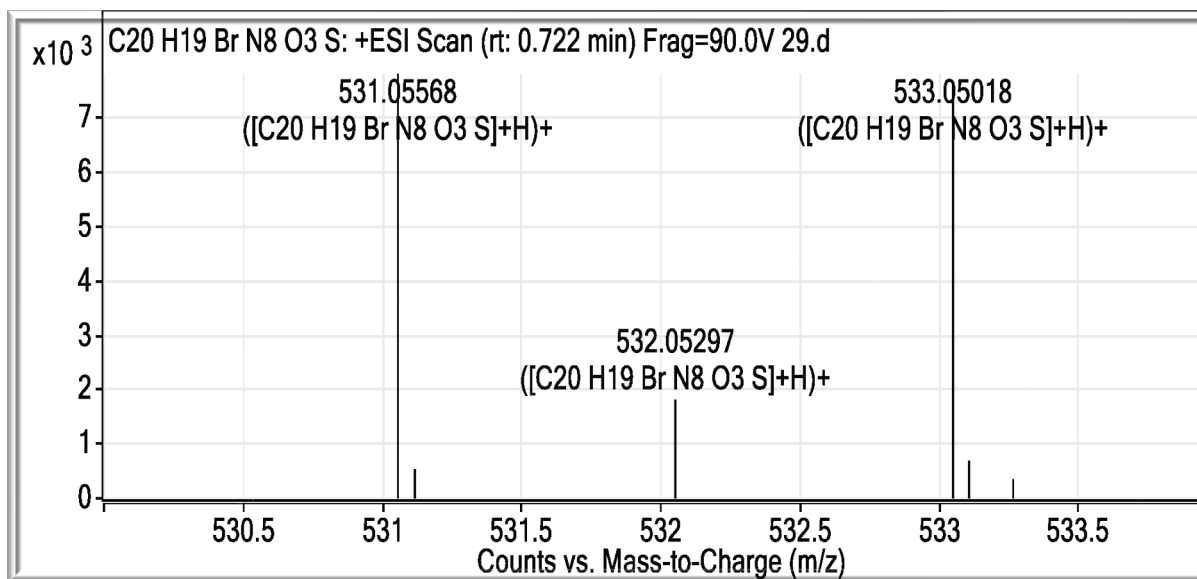

**Fig. S30.** Mass spectrum of compound **7f** ((*E*)-4-{4-[1-({1-(4-bromophenyl)-1*H*-1,2,3-triazol-4-yl)methoxy}imino)ethyl]-5-methyl-1*H*-1,2,3-triazol-1-yl}benzenesulfonamide).

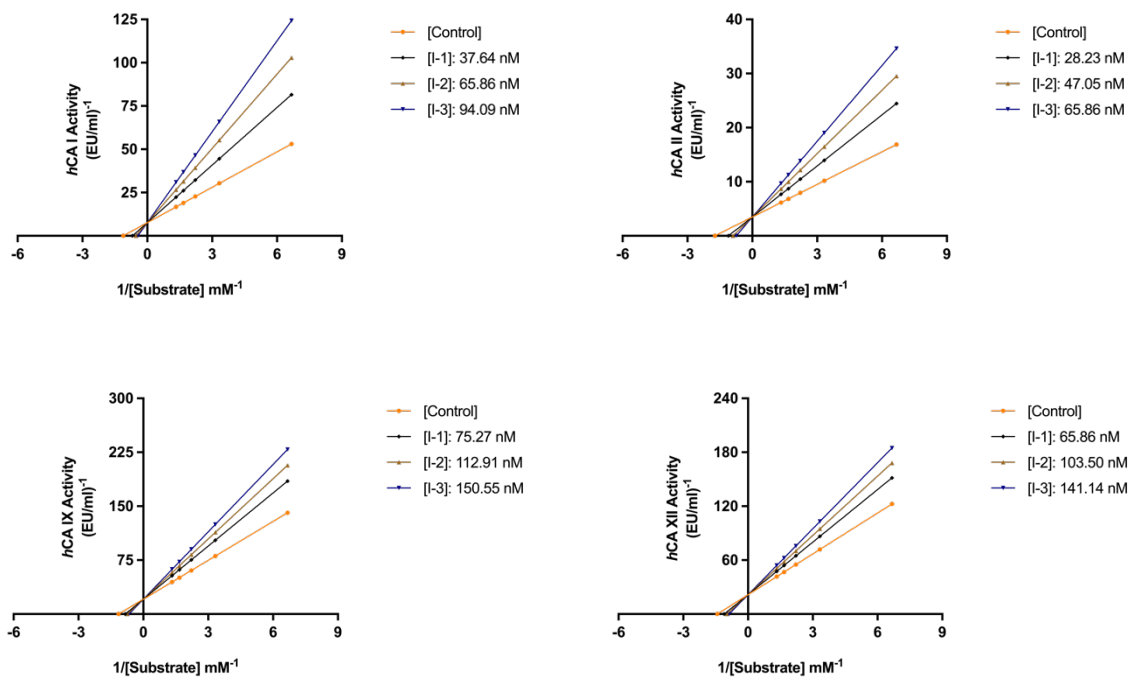

**Fig. S31.** Lineweaver-Burk plots of compound **7f** ((*E*)-4-{4-[1-({[1-(4-bromophenyl)-1*H*-1,2,3-triazol-4-yl]methoxy}imino)ethyl]-5-methyl-1*H*-1,2,3-triazol-1-yl}benzenesulfonamide).

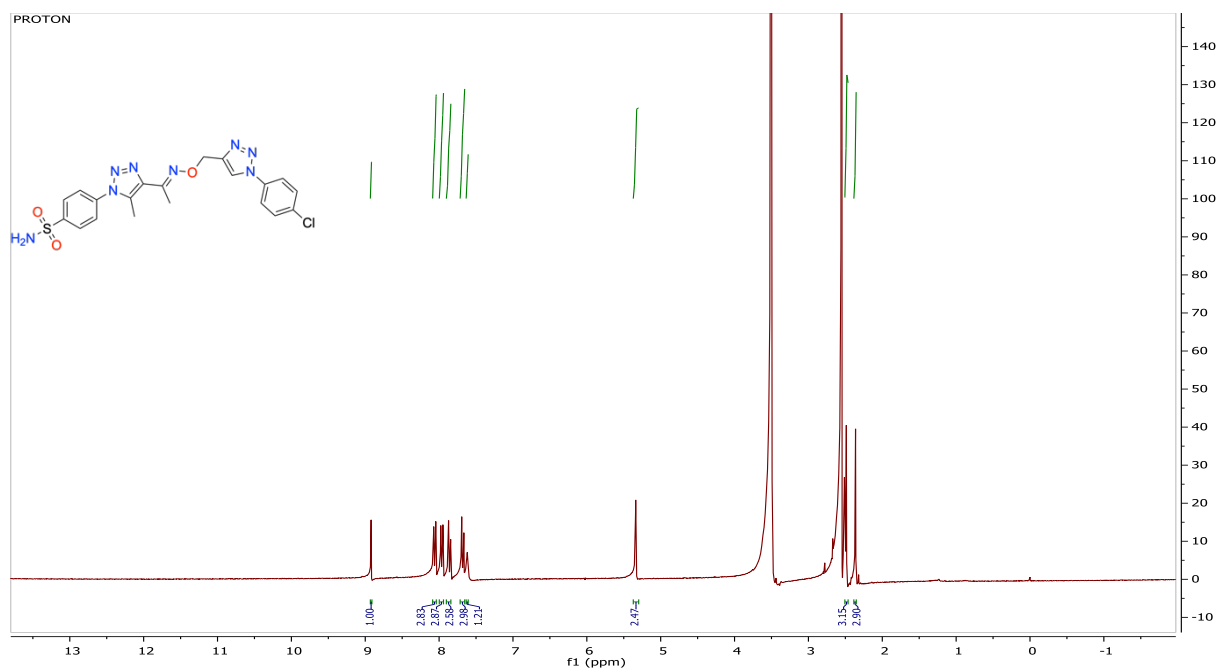

**Fig. S32.**  $^1\text{H}$  NMR spectrum (300 MHz,  $\text{DMSO-}d_6$ ) of compound **7g** (4-{4-[1-({[1-(4-chlorophenyl)-1*H*-1,2,3-triazol-4-yl]methoxy)imino]ethyl]-5-methyl-1*H*-1,2,3-triazol-1-yl}benzenesulfonamide).

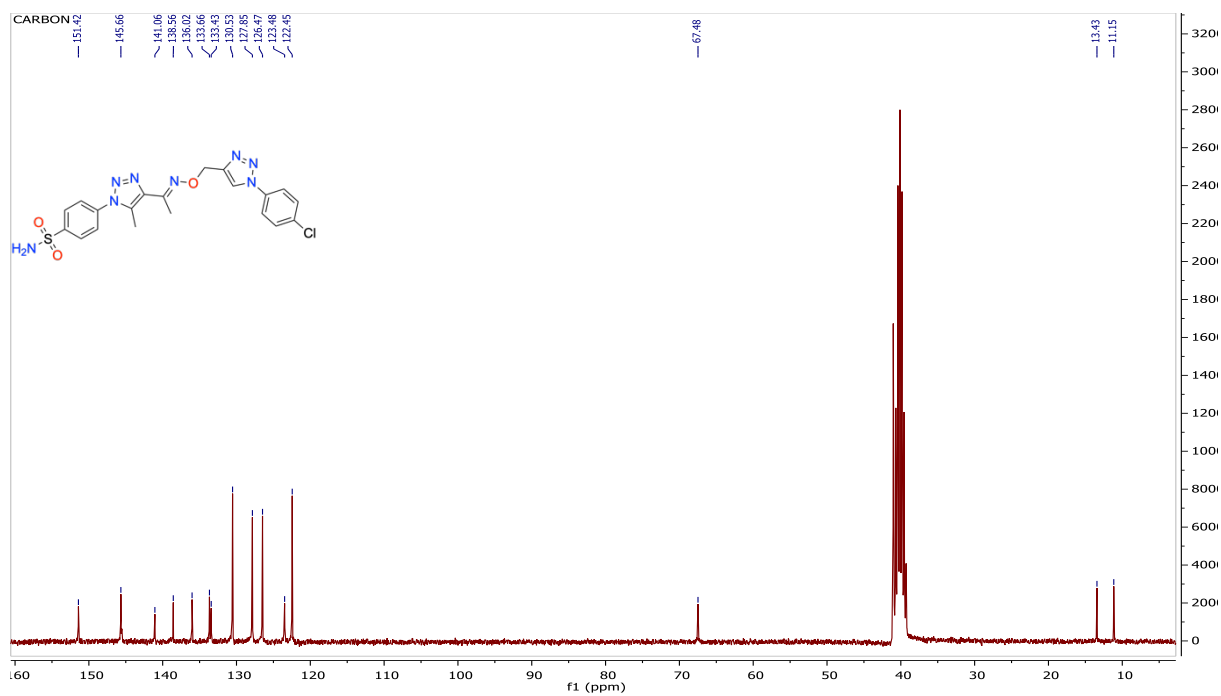

**Fig. S33.**  $^{13}\text{C}$  NMR spectrum (75 MHz,  $\text{DMSO-}d_6$ ) of compound **7g** (4-{4-[1-({[1-(4-chlorophenyl)-1*H*-1,2,3-triazol-4-yl]methoxy)imino]ethyl]-5-methyl-1*H*-1,2,3-triazol-1-yl}benzenesulfonamide).



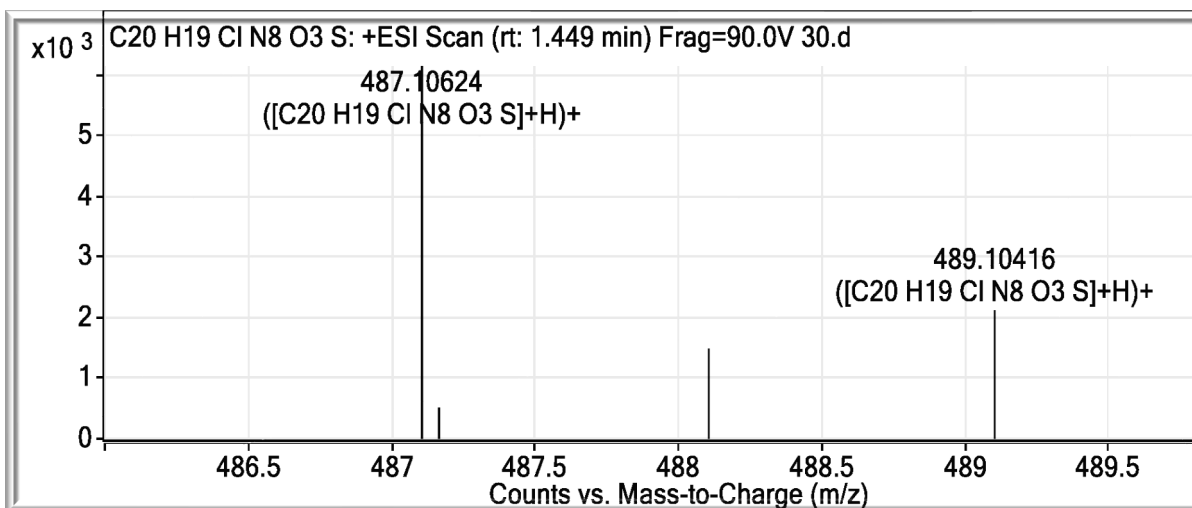

**Fig. S35.** Mass spectrum of compound **7g** (4-{4-[1-({[1-(4-chlorophenyl)-1*H*-1,2,3-triazol-4-yl]methoxy}imino)ethyl]-5-methyl-1*H*-1,2,3-triazol-1-yl}benzenesulfonamide).



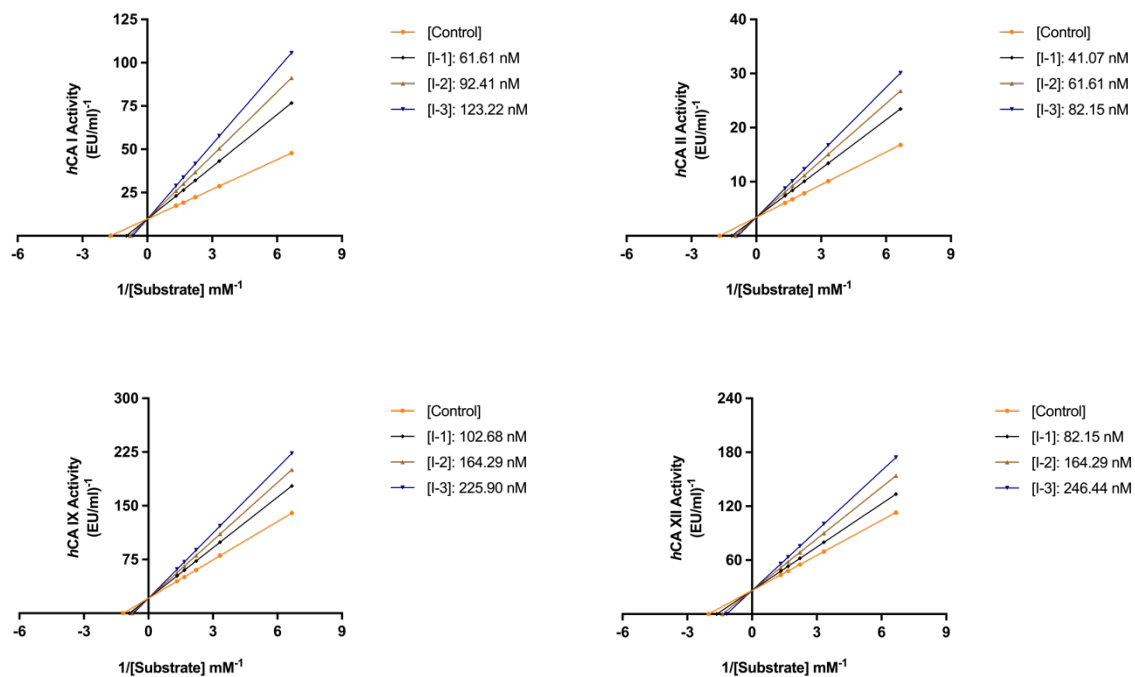

**Fig. S36.** Lineweaver-Burk plots of compound **7g** (4-{4-[1-({1-(4-chlorophenyl)-1*H*-1,2,3-triazol-4-yl)methoxy}imino)ethyl]-5-methyl-1*H*-1,2,3-triazol-1-yl}benzenesulfonamide).

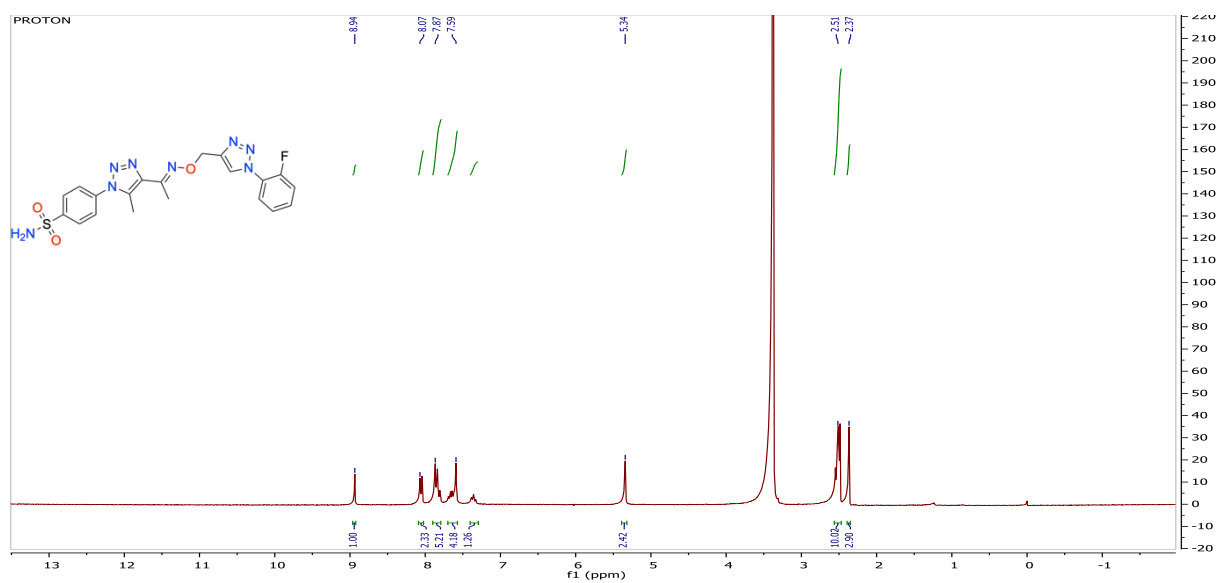

**Fig. S37.**  $^1\text{H}$  NMR spectrum (300 MHz,  $\text{DMSO-}d_6$ ) of compound **7h** (4-{4-[1-({[1-(2-fluorophenyl)-1*H*-1,2,3-triazol-4-yl]methoxy)imino]ethyl]-5-methyl-1*H*-1,2,3-triazol-1-yl]benzenesulfonamide).



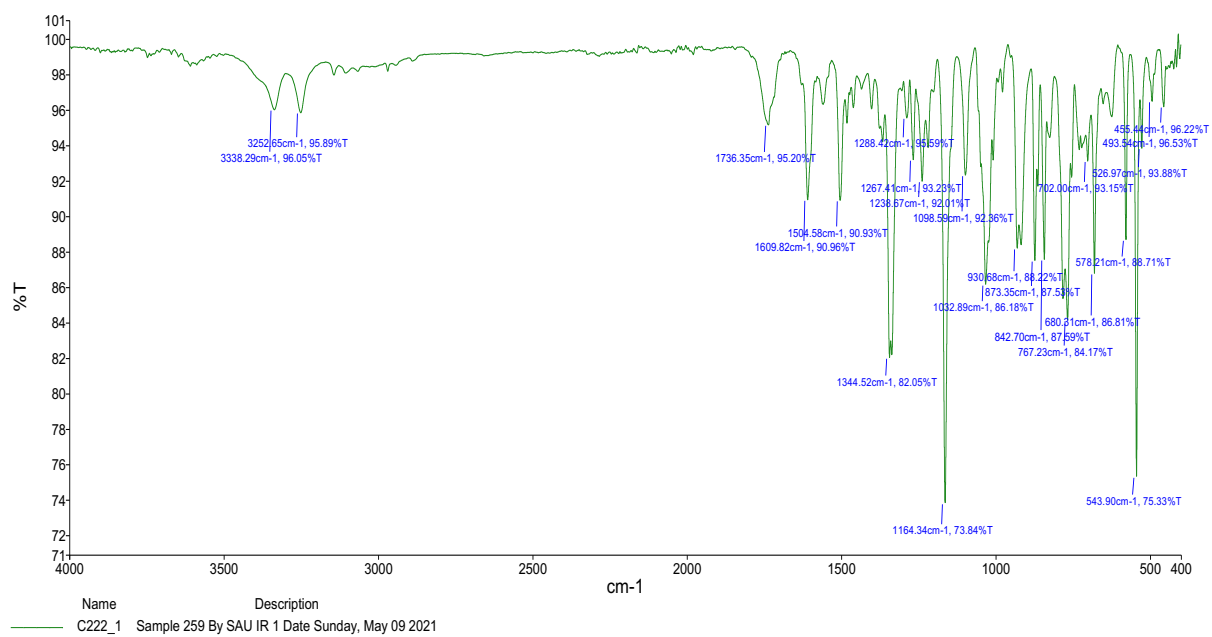

**Fig. S39.** IR spectrum of compound **7h** (4-{4-[1-({[1-(2-fluorophenyl)-1*H*-1,2,3-triazol-4-yl]methoxy)imino]ethyl]-5-methyl-1*H*-1,2,3-triazol-1-yl}benzenesulfonamide).

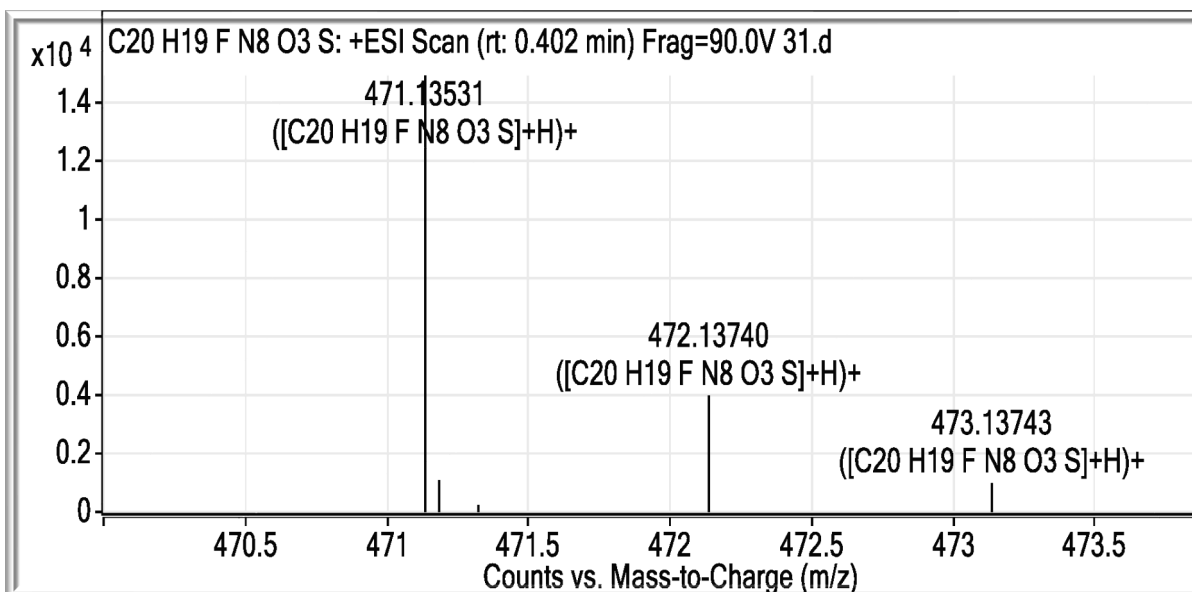

**Fig. S40.** Mass spectrum of compound **7h** (4-{4-[1-({1-(2-fluorophenyl)-1*H*-1,2,3-triazol-4-yl)methoxy}imino)ethyl]-5-methyl-1*H*-1,2,3-triazol-1-yl}benzenesulfonamide).

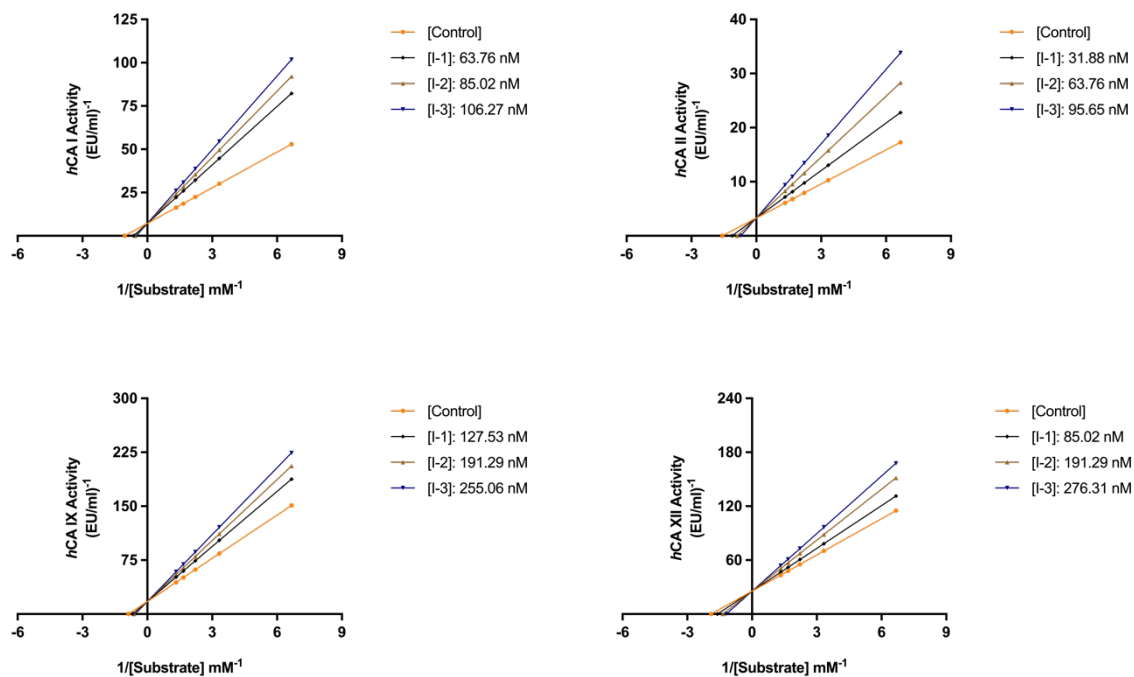

**Fig. S41.** Lineweaver-Burk plots of compound **7h** (4-{4-[1-({[1-(2-fluorophenyl)-1*H*-1,2,3-triazol-4-yl)methoxy]imino)ethyl]-5-methyl-1*H*-1,2,3-triazol-1-yl}benzenesulfonamide).

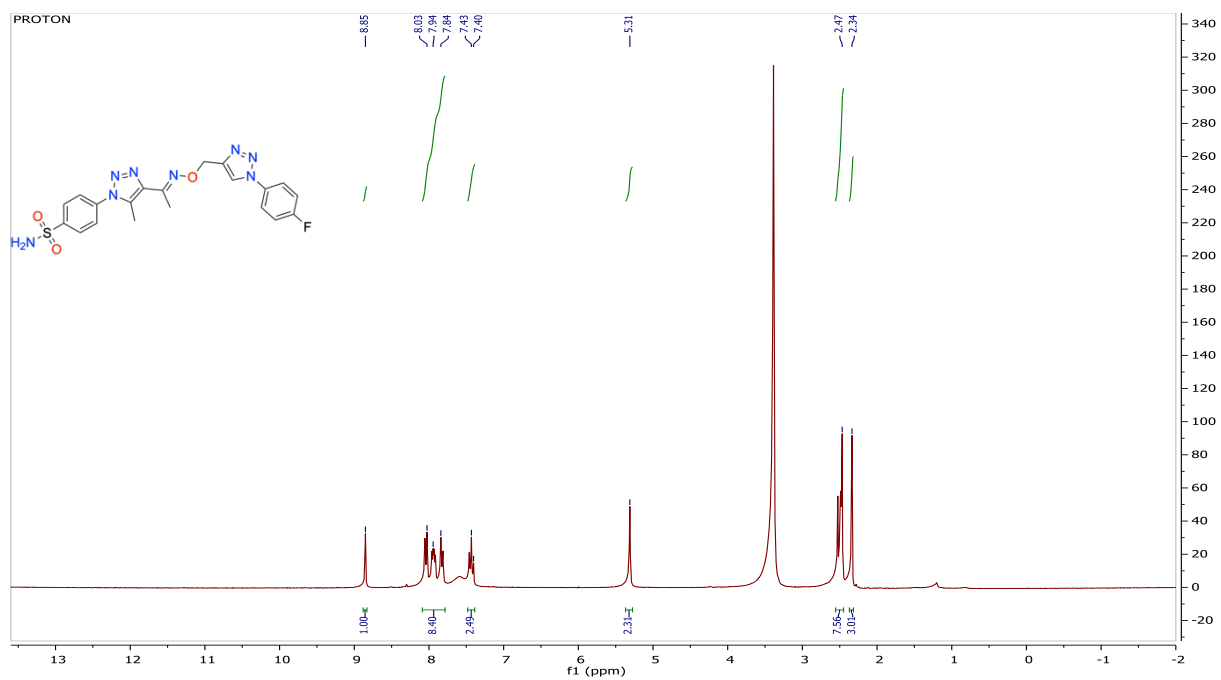

**Fig. S42.**  $^1\text{H}$  NMR spectrum (300 MHz,  $\text{DMSO-}d_6$ ) of compound **7i** (4-{4-[1-({1-(4-fluorophenyl)-1*H*-1,2,3-triazol-4-yl]methoxy}imino)ethyl]-5-methyl-1*H*-1,2,3-triazol-1-yl}benzenesulfonamide).

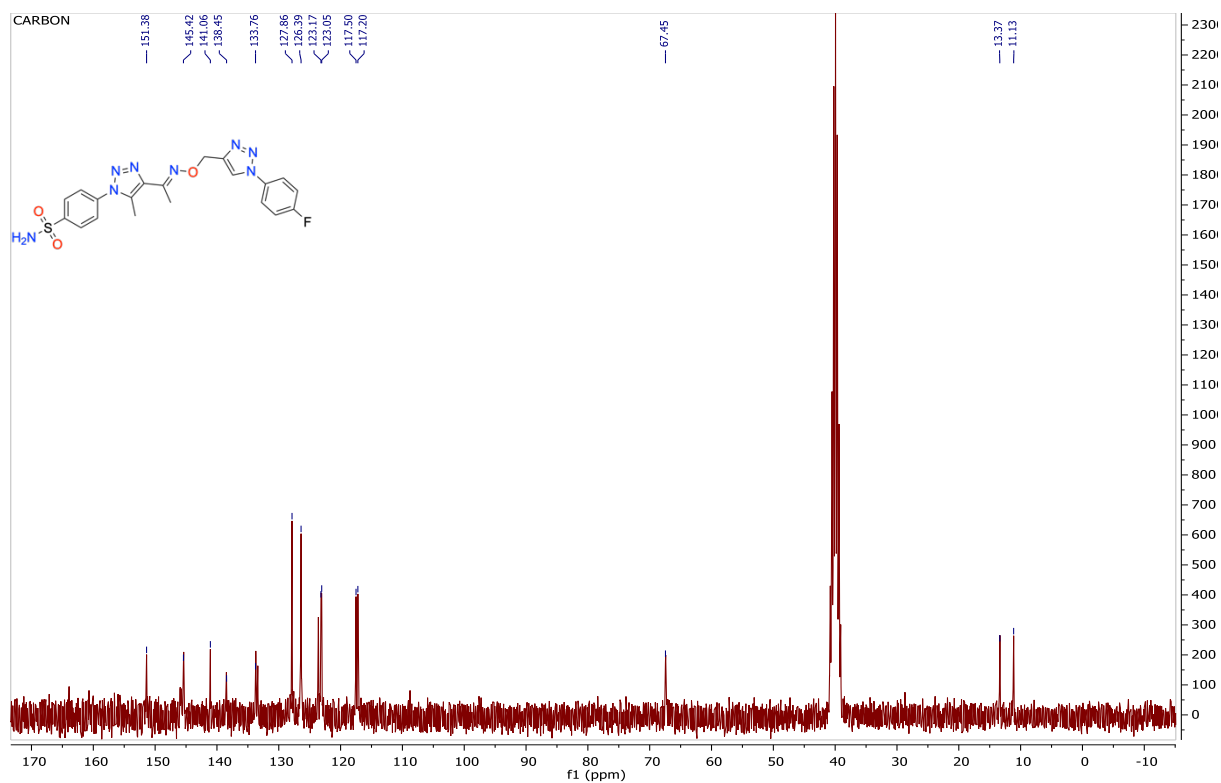

**Fig. S43.**  $^{13}\text{C}$  NMR spectrum (75 MHz,  $\text{DMSO-}d_6$ ) of compound **7i** (4-{4-[1-({[1-(4-fluorophenyl)-1H-1,2,3-triazol-4-yl]methoxy}imino)ethyl]-5-methyl-1H-1,2,3-triazol-1-yl}benzenesulfonamide).





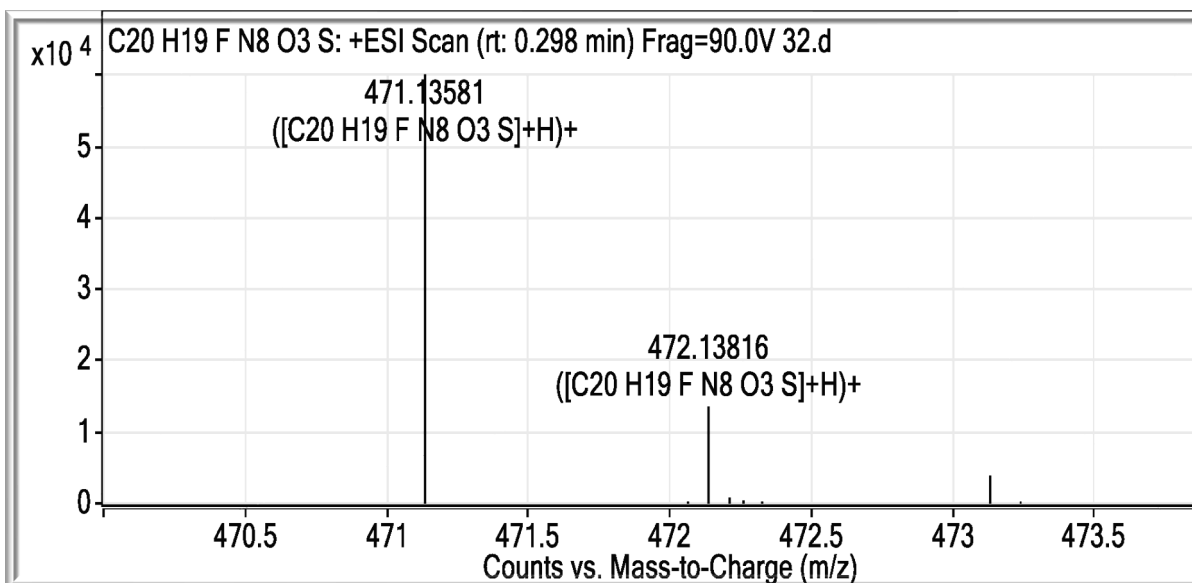

**Fig. S45.** Mass spectrum of compound **7i** (4-{4-[1-({[1-(4-fluorophenyl)-1*H*-1,2,3-triazol-4-yl]methoxy}imino)ethyl]-5-methyl-1*H*-1,2,3-triazol-1-yl}benzenesulfonamide).

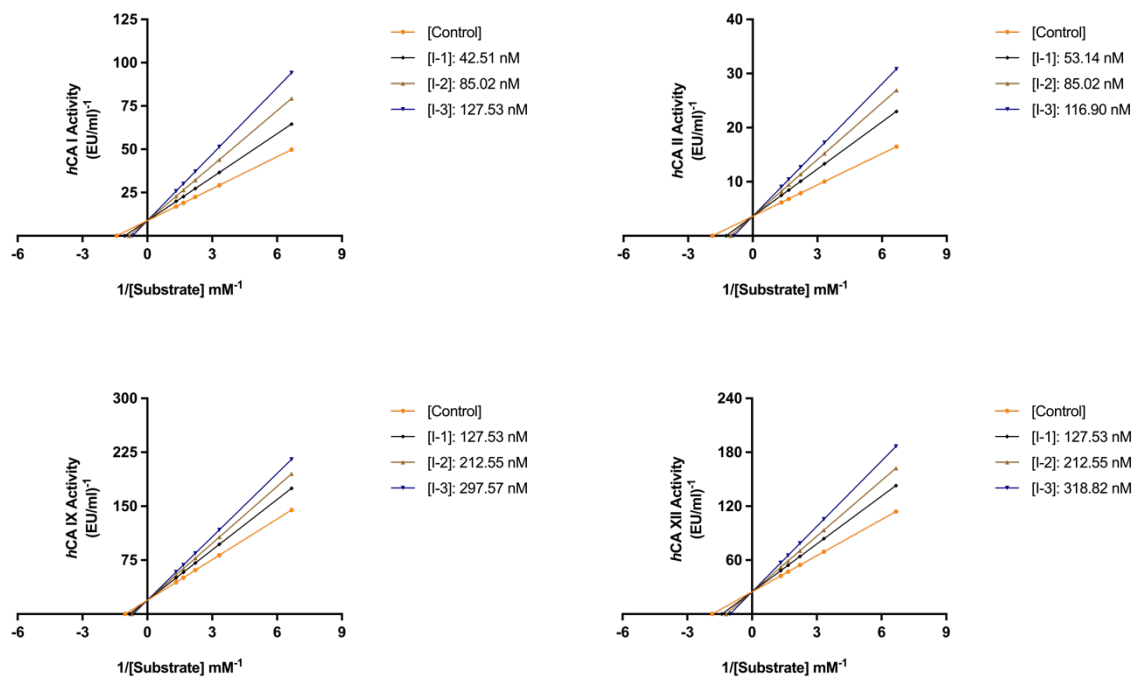

**Fig. S46.** Lineweaver-Burk plots of compound **7i** (4-{4-[1-({[1-(4-fluorophenyl)-1*H*-1,2,3-triazol-4-yl)methoxy]imino)ethyl]-5-methyl-1*H*-1,2,3-triazol-1-yl}benzenesulfonamide).

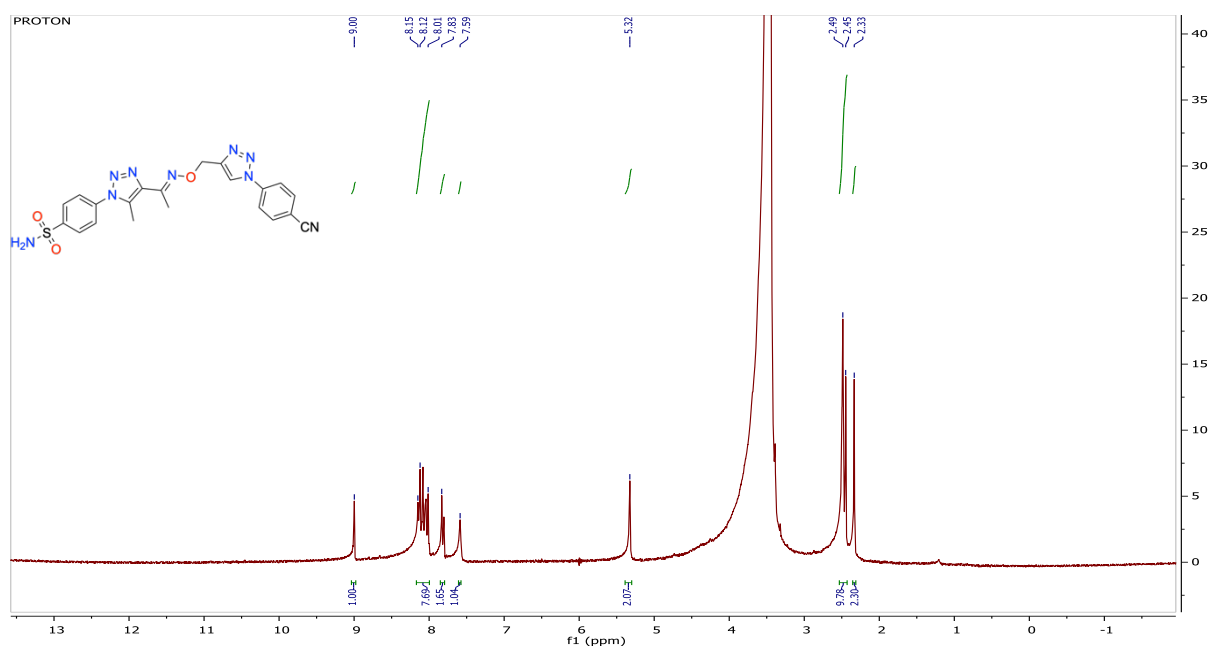

**Fig. S47.**  $^1\text{H}$  NMR spectrum (300 MHz,  $\text{DMSO}-d_6$ ) of compound **7j** (4-{4-[1-({[1-(4-cyanophenyl)-1*H*-1,2,3-triazol-4-yl]methoxy)imino]ethyl]-5-methyl-1*H*-1,2,3-triazol-1-yl]}benzenesulfonamide).

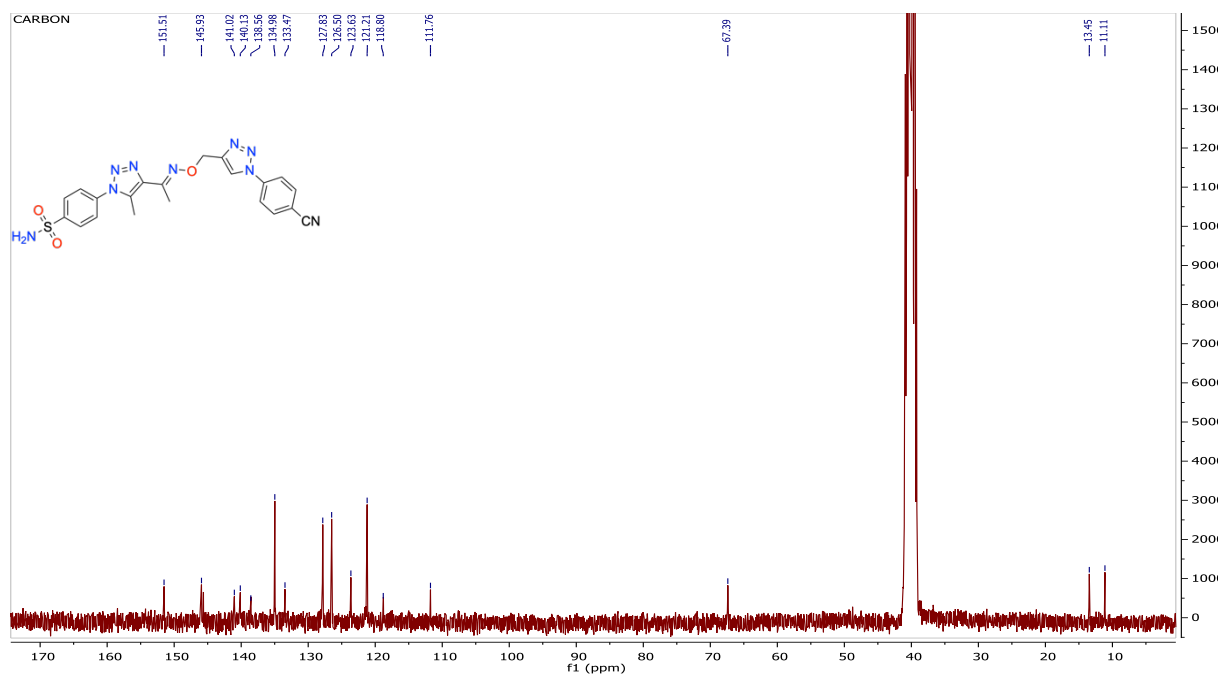

**Fig. S48.**  $^{13}\text{C}$  NMR spectrum (75 MHz,  $\text{DMSO-}d_6$ ) of compound **7j** (4-{4-[1-({[1-(4-cyanophenyl)-1*H*-1,2,3-triazol-4-yl]methoxy)imino]ethyl]-5-methyl-1*H*-1,2,3-triazol-1-yl}benzenesulfonamide).

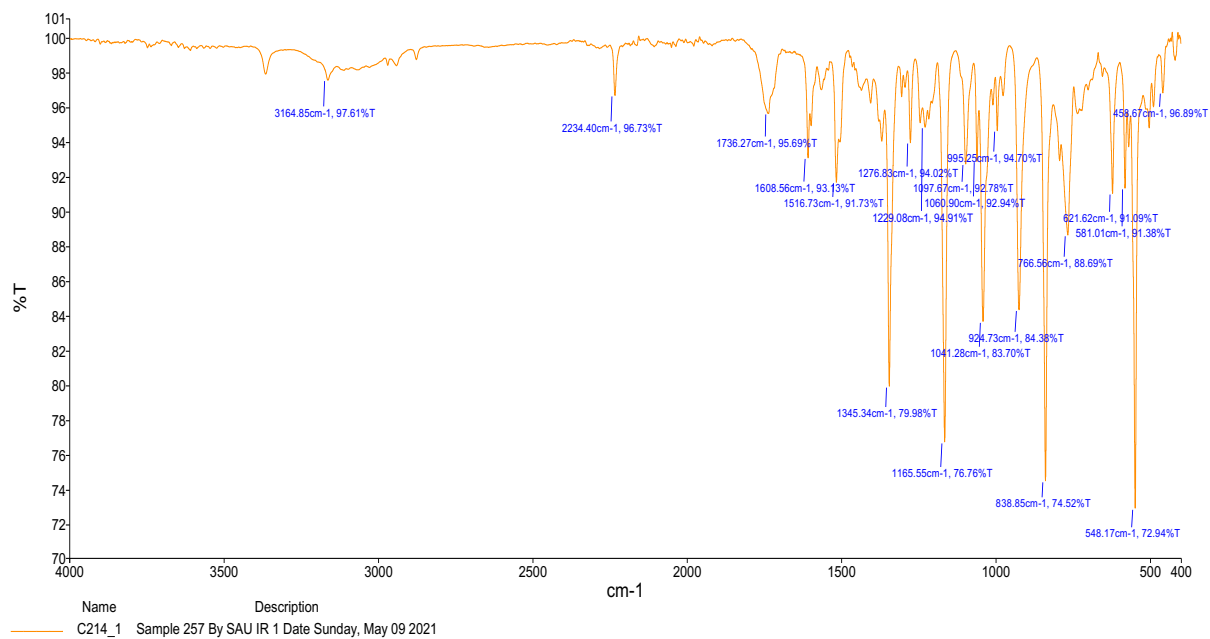

**Fig. S49.** IR spectrum of compound **7j** (4-{4-[1-({1-(4-cyanophenyl)-1*H*-1,2,3-triazol-4-yl)methoxy}imino)ethyl]-5-methyl-1*H*-1,2,3-triazol-1-yl}benzenesulfonamide).

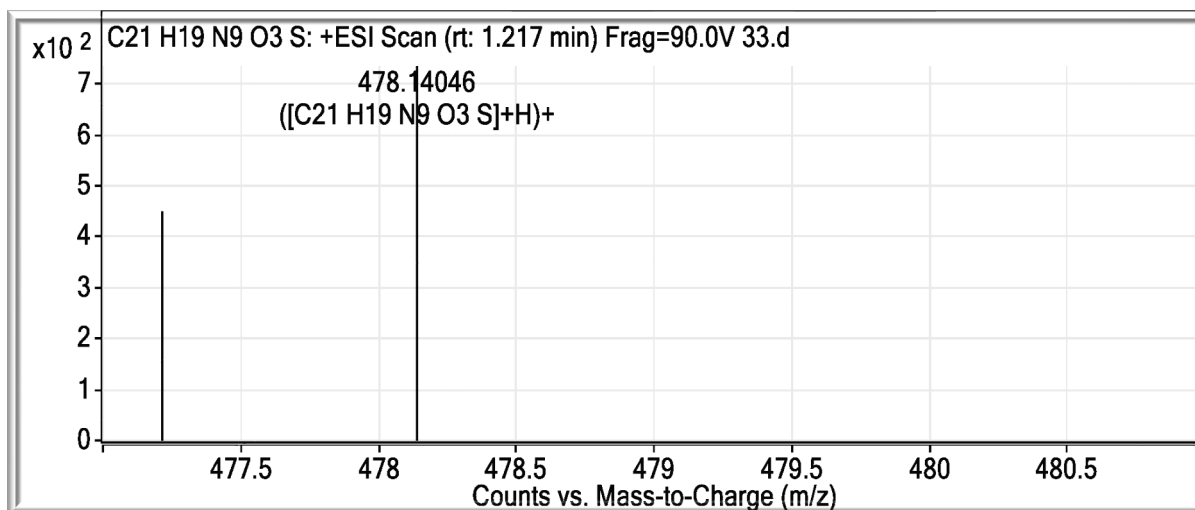

**Fig. S50.** Mass spectrum of compound **7j** (4-{4-[1-((1-(4-cyanophenyl)-1*H*-1,2,3-triazol-4-yl)methoxy)imino)ethyl]-5-methyl-1*H*-1,2,3-triazol-1-yl}benzenesulfonamide).

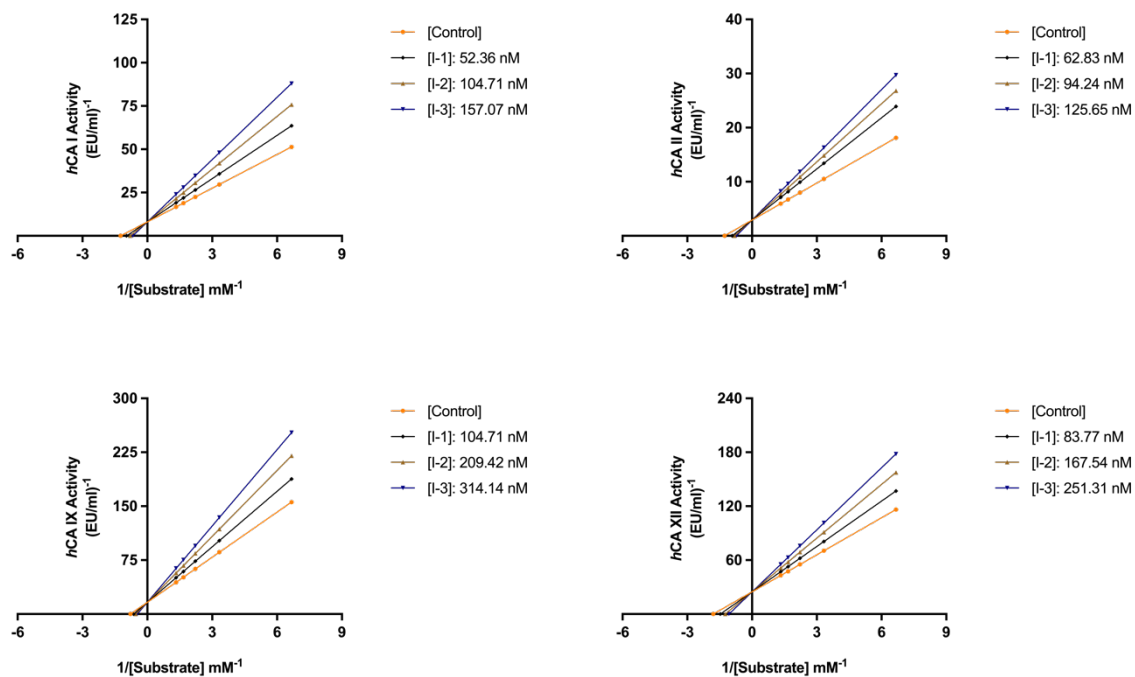

**Fig. S51.** Lineweaver-Burk plots of compound **7j** (4-{4-[1-({[1-(4-cyanophenyl)-1*H*-1,2,3-triazol-4-yl]methoxy}imino)ethyl]-5-methyl-1*H*-1,2,3-triazol-1-yl}benzenesulfonamide).



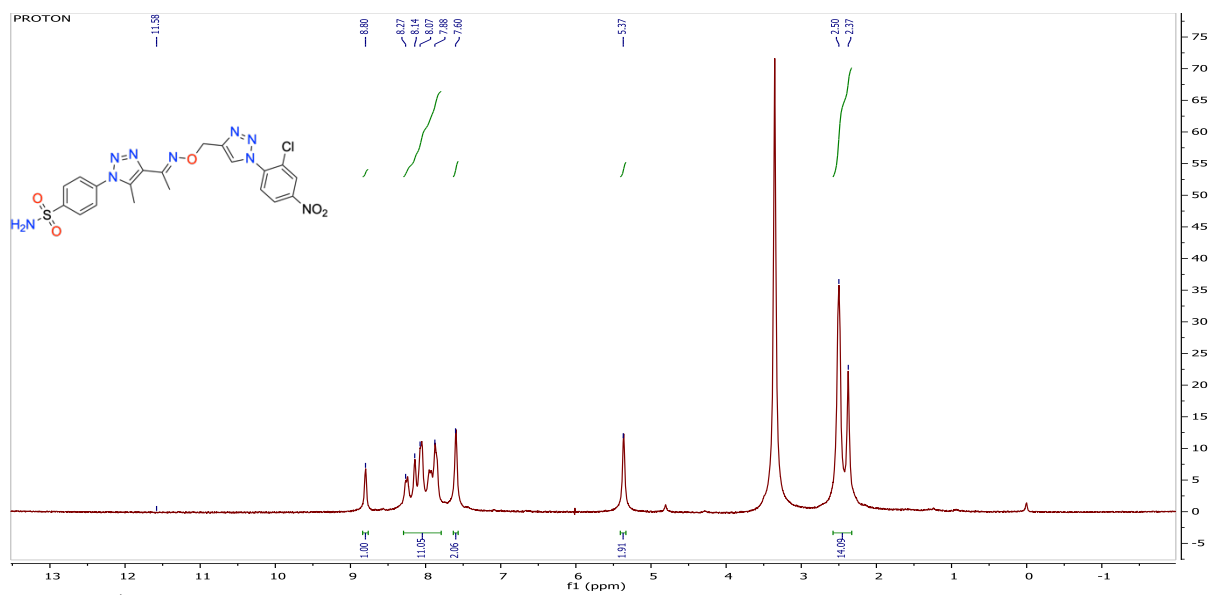

**Fig. S52.**  $^1\text{H}$  NMR spectrum (300 MHz,  $\text{DMSO-}d_6$ ) of compound **7k** (4-{4-[1-({[1-(2-chloro-4-nitrophenyl)-1*H*-1,2,3-triazol-4-yl]methoxy}imino)ethyl]-5-methyl-1*H*-1,2,3-triazol-1-yl]benzenesulfonamide).

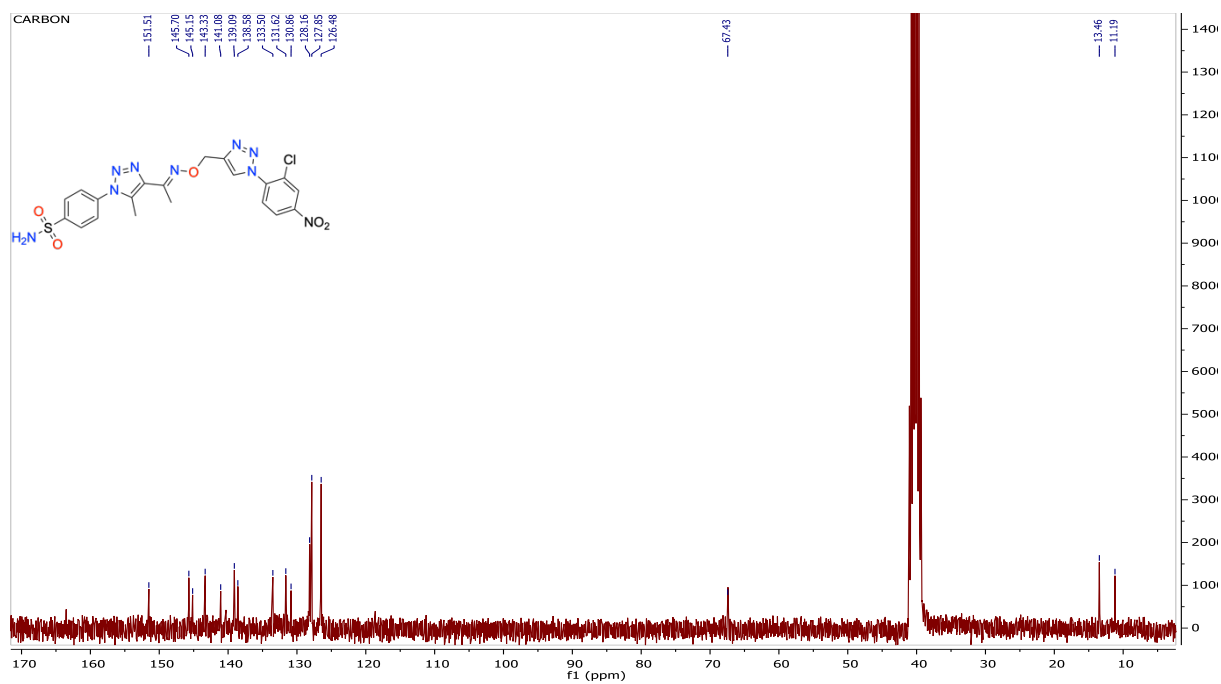

**Fig. S53.**  $^{13}\text{C}$  NMR spectrum (75 MHz,  $\text{DMSO-}d_6$ ) of compound **7k** (4-{4-[1-({[1-(2-chloro-4-nitrophenyl)-1*H*-1,2,3-triazol-4-yl]methoxy}imino)ethyl]-5-methyl-1*H*-1,2,3-triazol-1-yl}benzenesulfonamide).

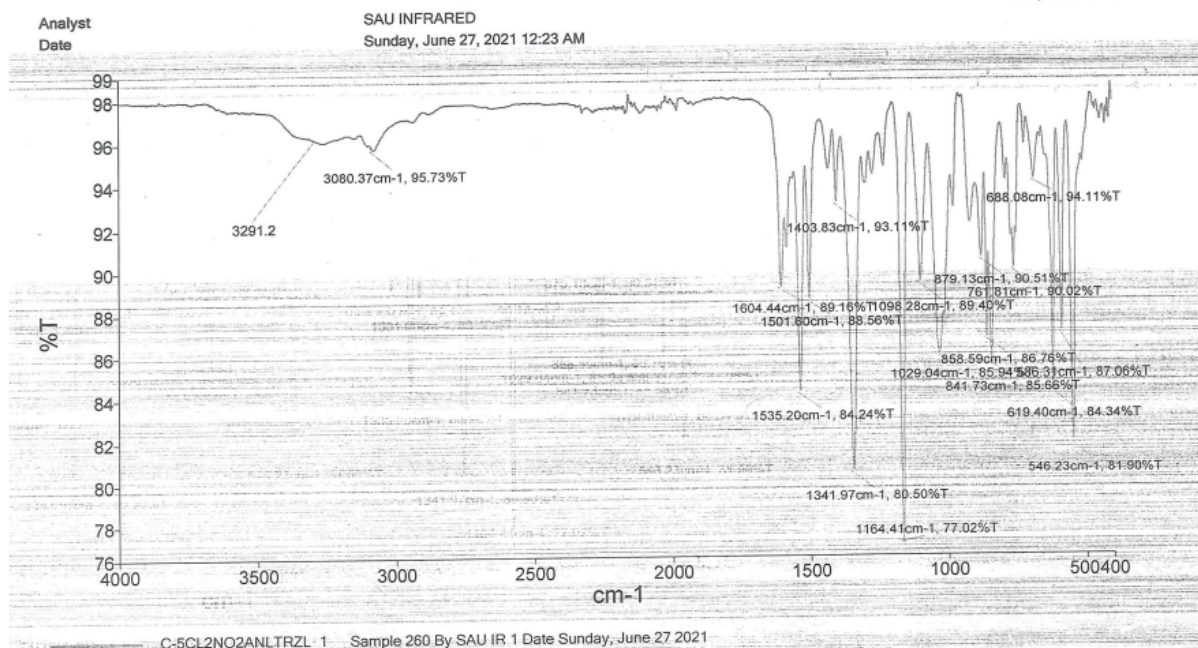

**Fig. S54.** IR spectrum of compound **7k** (4-{4-[1-({1-(2-chloro-4-nitrophenyl)-1*H*-1,2,3-triazol-4-yl)methoxy}imino)ethyl]-5-methyl-1*H*-1,2,3-triazol-1-yl}benzenesulfonamide).

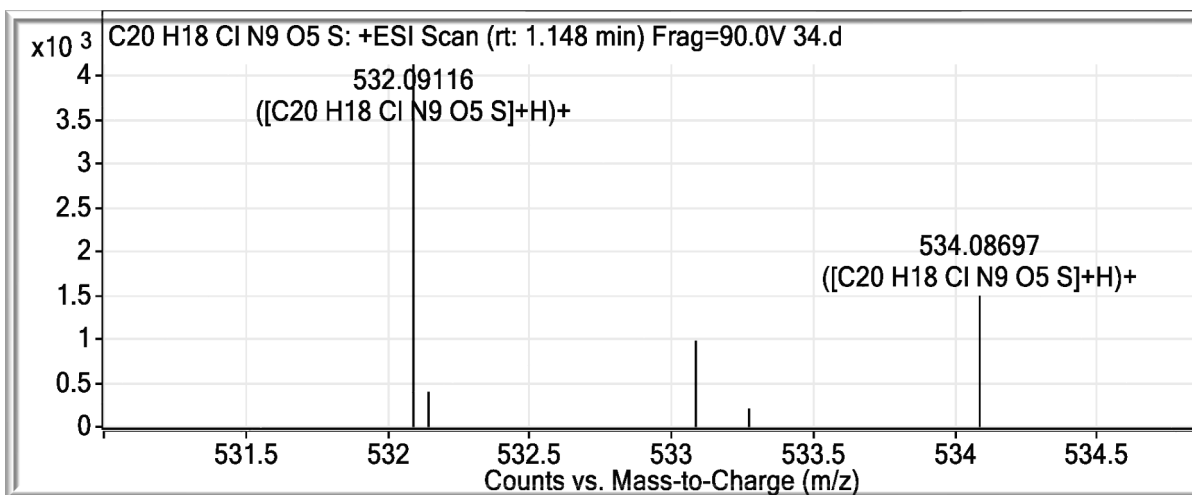

**Fig. S55.** Mass spectrum of compound **7k** (4-{4-[1-({[1-(2-chloro-4-nitrophenyl)-1H-1,2,3-triazol-4-yl]methoxy}imino)ethyl]-5-methyl-1H-1,2,3-triazol-1-yl}benzenesulfonamide).

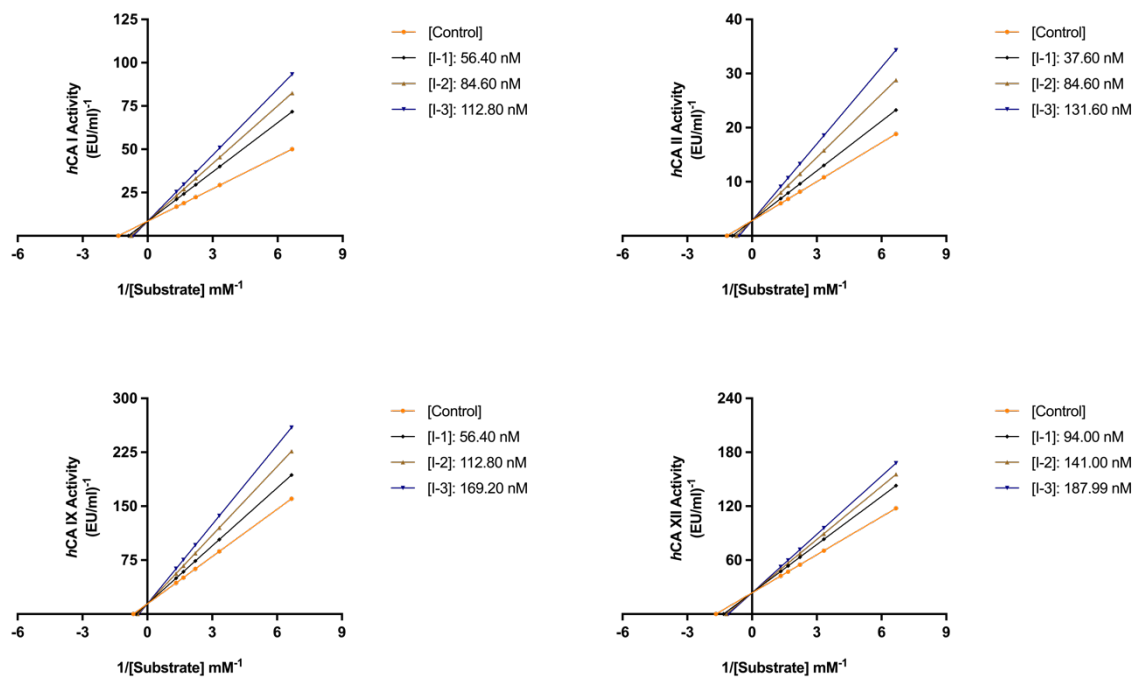

**Fig. S56.** Lineweaver-Burk plots of compound **7k** (4-{4-[1-({[1-(2-chloro-4-nitrophenyl)-1*H*-1,2,3-triazol-4-yl]methoxy}imino)ethyl]-5-methyl-1*H*-1,2,3-triazol-1-yl}benzenesulfonamide).

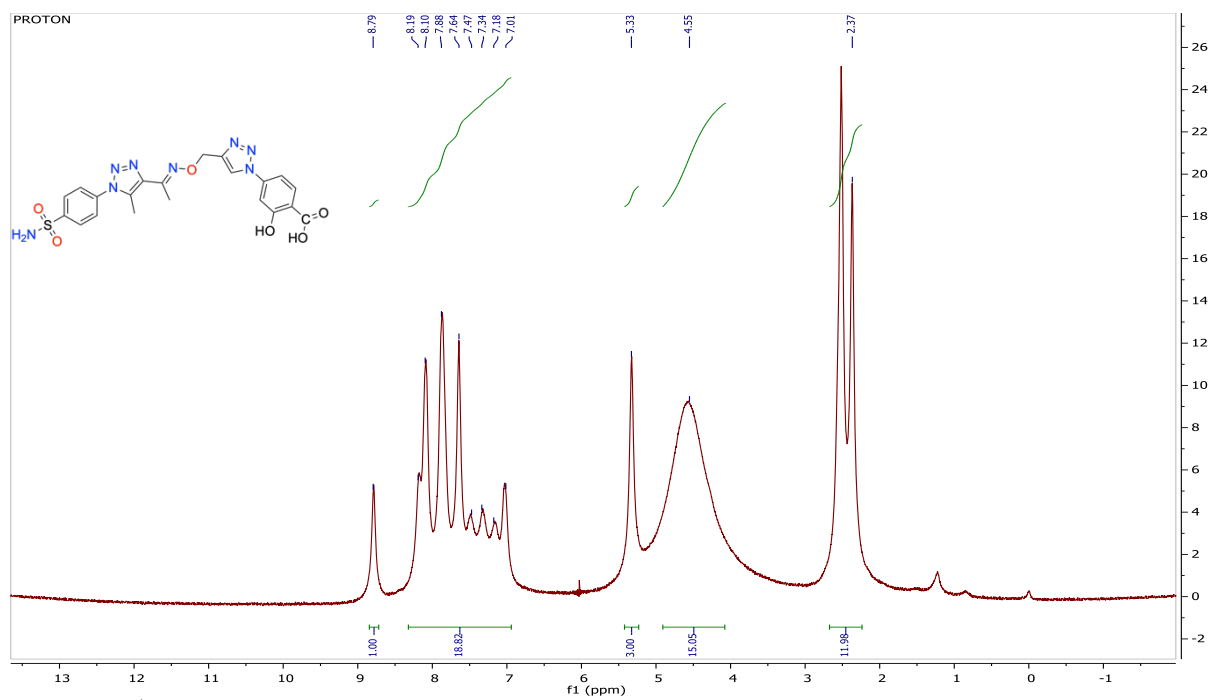

**Fig. S57.**  $^1\text{H}$  NMR spectrum (300 MHz,  $\text{DMSO-}d_6$ ) of compound **7I** (2-hydroxy-4-(4-(((1-[5-methyl-1-(4-sulfamoylphenyl)-1H-1,2,3-triazol-4-yl]ethylidene)amino)oxy)methyl)-1H-1,2,3-triazol-1-yl)benzoic acid).

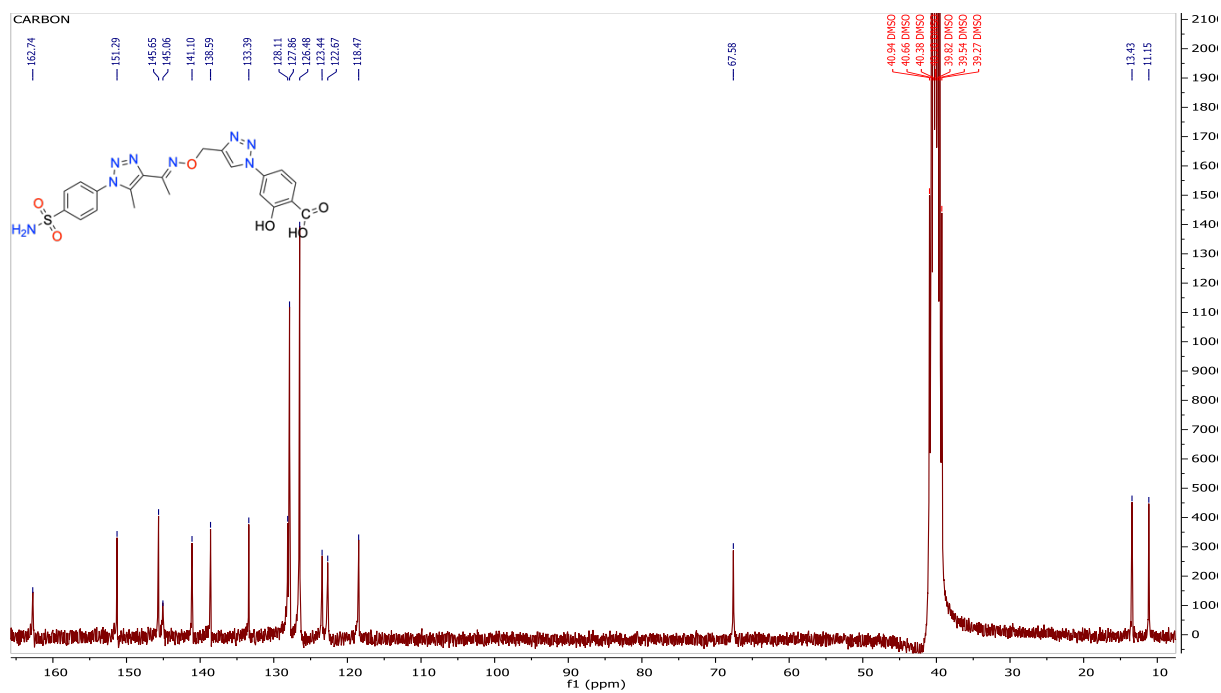

**Fig. S58.**  $^{13}\text{C}$  NMR spectrum (75 MHz,  $\text{DMSO-}d_6$ ) of compound **71** (2-hydroxy-4-(4-[[[1-(5-methyl-1-(4-sulfamoylphenyl)-1H-1,2,3-triazol-4-yl]ethylidene)amino]oxy]methyl)-1H-1,2,3-triazol-1-yl)benzoic acid).

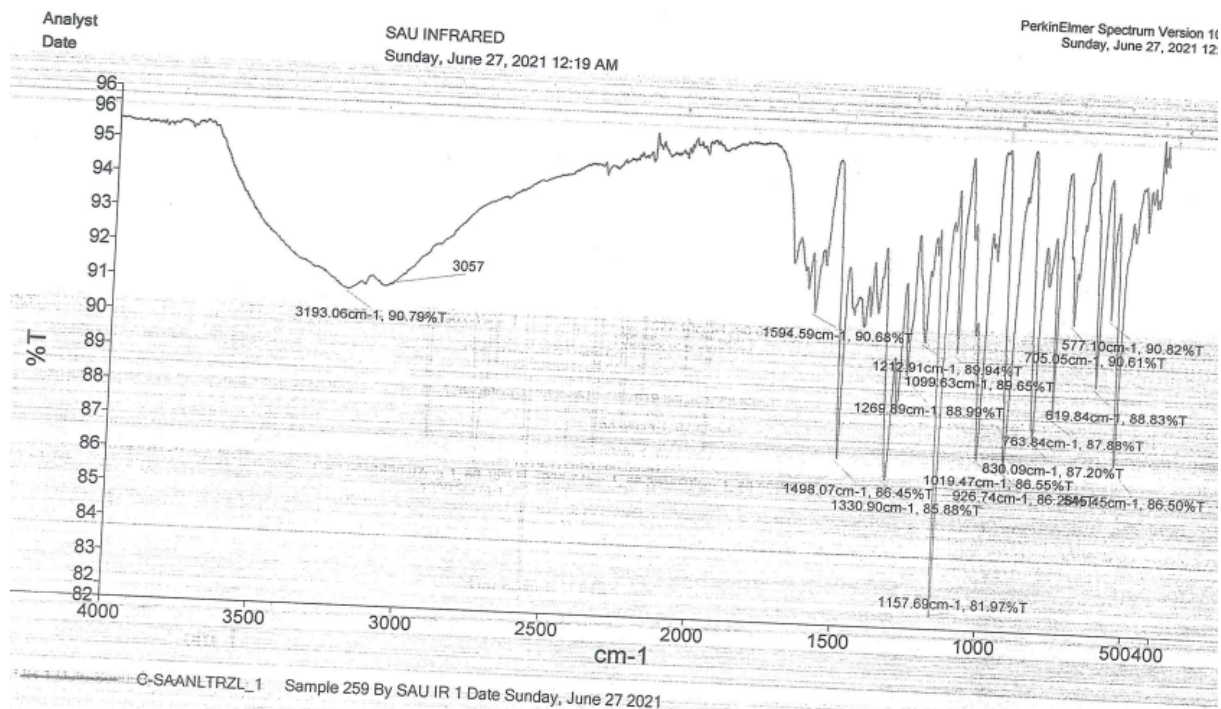

**Fig. S59.** IR spectrum of compound **7I** (2-hydroxy-4-(4-(((1-[5-methyl-1-(4-sulfamoylphenyl)-1H-1,2,3-triazol-4-yl]ethylidene)amino)oxy)methyl)-1H-1,2,3-triazol-1-yl)benzoic acid).



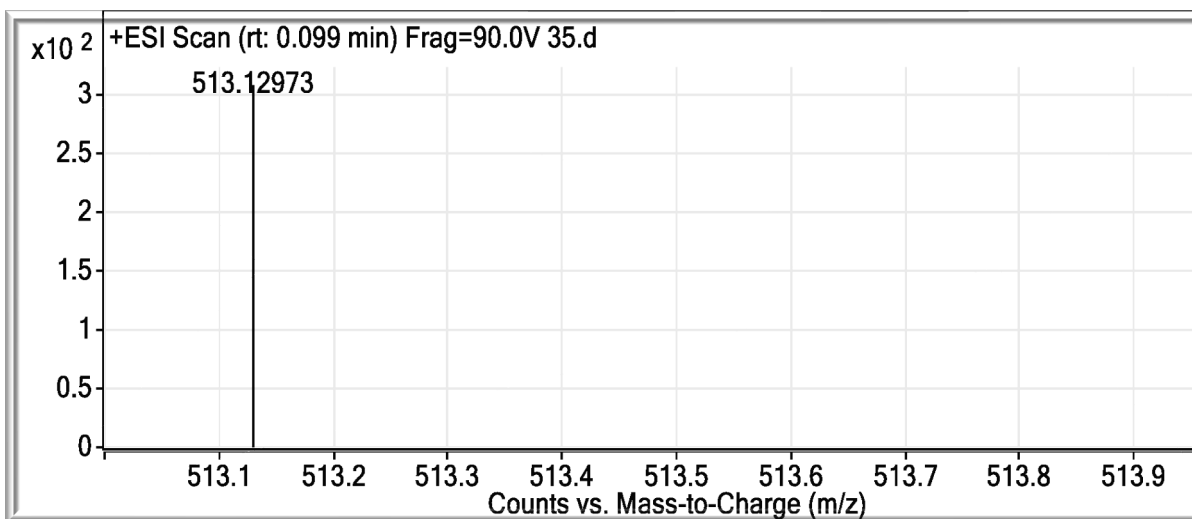

**Fig. S60.** Mass spectrum of compound **7I** (2-hydroxy-4-(4-(((1-[5-methyl-1-(4-sulfamoylphenyl)-1*H*-1,2,3-triazol-4-yl]ethylidene)amino)oxy)methyl)-1*H*-1,2,3-triazol-1-yl)benzoic acid).

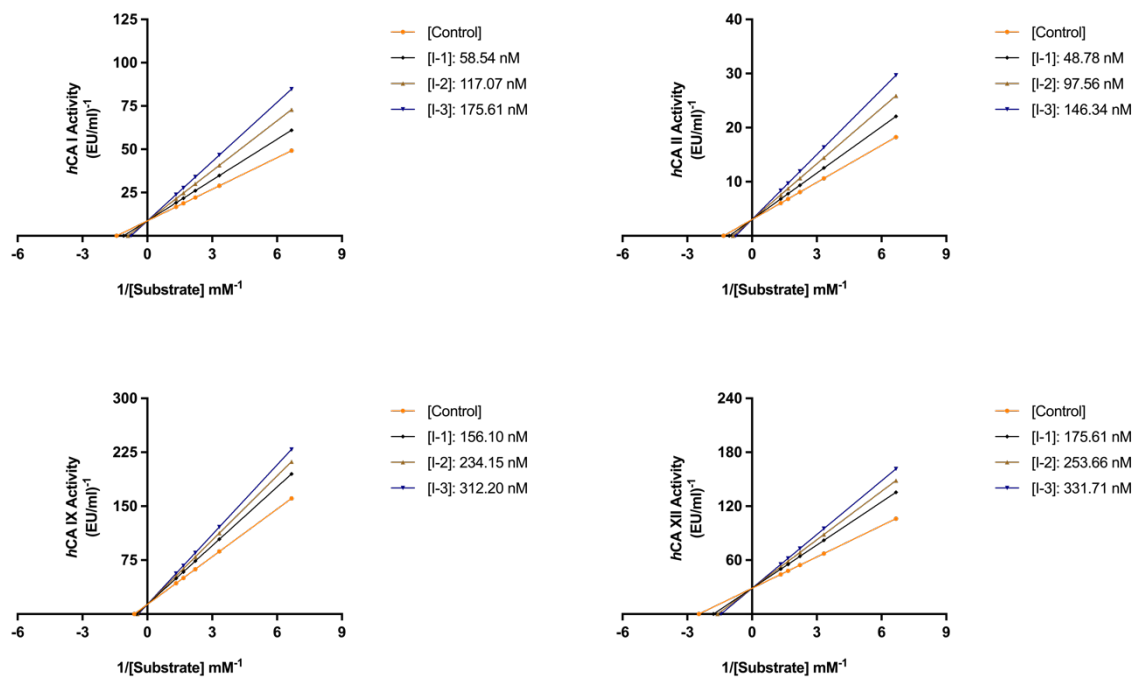

**Fig. S61.** Lineweaver-Burk plots of compound **71** (2-hydroxy-4-(4-(((1-[5-methyl-1-(4-sulfamoylphenyl)-1*H*-1,2,3-triazol-4-yl)ethylidene)amino)oxy)methyl)-1*H*-1,2,3-triazol-1-yl)benzoic acid).

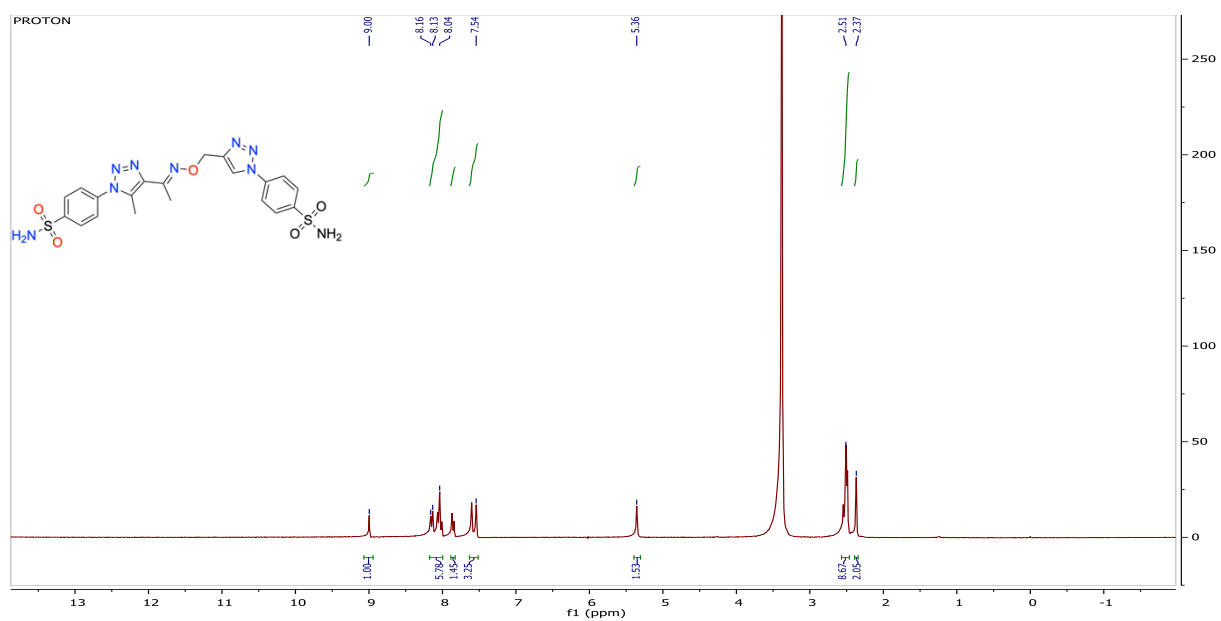

**Fig. S62.** <sup>1</sup>H NMR spectrum (300 MHz, DMSO-*d*<sub>6</sub>) of compound **7m** (4-(4-(((1-[5-methyl-1-(4-sulfamoylphenyl)-1H-1,2,3-triazol-4-yl]ethylidene)amino)oxy)methyl)-1H-1,2,3-triazol-1-yl)benzenesulfonamide).

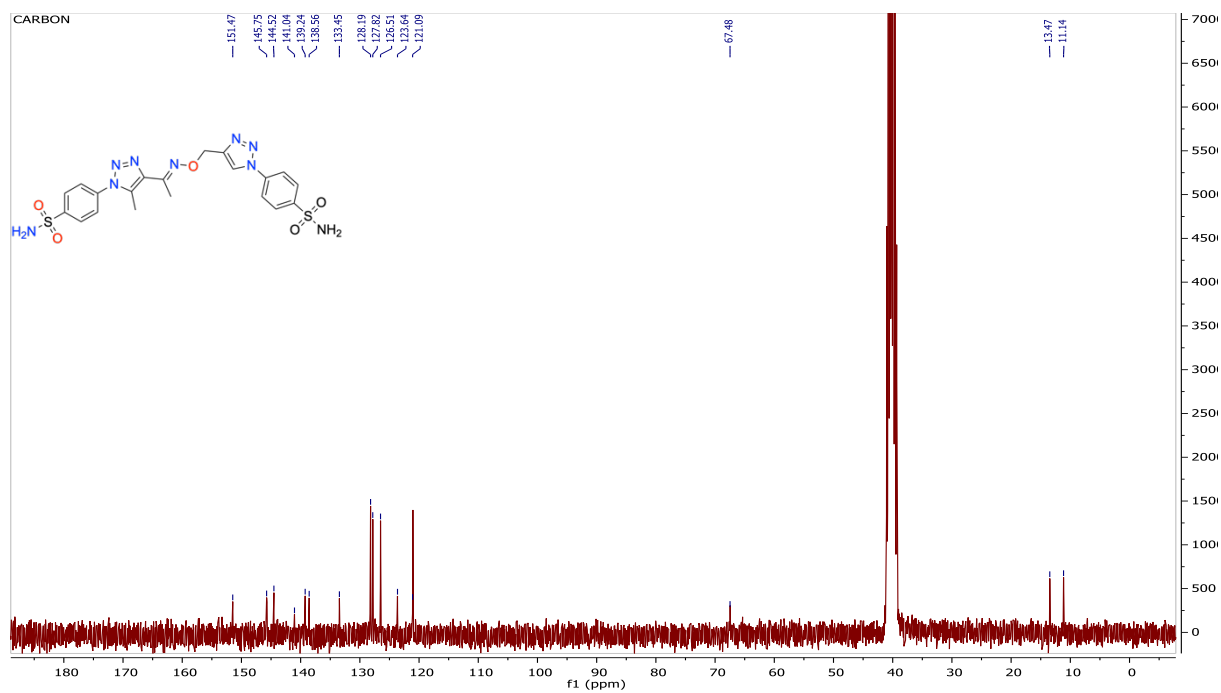

**Fig. S63.**  $^{13}\text{C}$  NMR spectrum (75 MHz,  $\text{DMSO-}d_6$ ) of compound **7m** (4-(4-(((1-[5-methyl-1-(4-sulfamoylphenyl)-1H-1,2,3-triazol-4-yl]ethylidene)amino)oxy)methyl)-1H-1,2,3-triazol-1-yl)benzenesulfonamide).

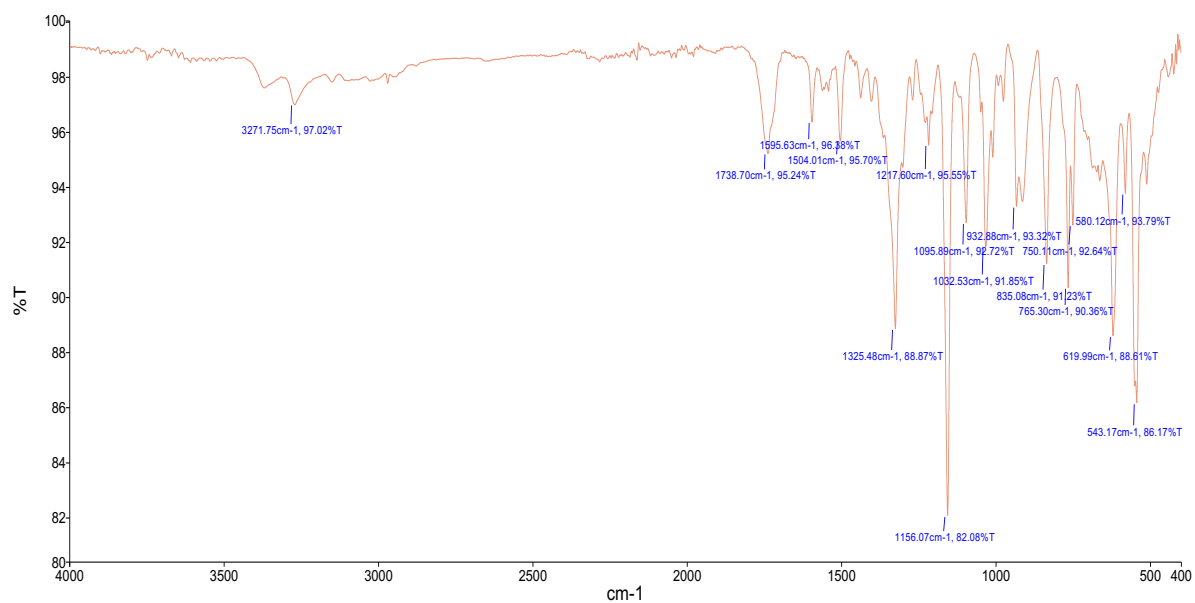

Name: C237\_1  
 Description: Sample 255 By SAU IR 1 Date Sunday, May 09 2021

**Fig. S64.** IR spectrum of compound **7m** (4-(4-[[{1-[5-methyl-1-(4-sulfamoylphenyl)-1H-1,2,3-triazol-4-yl]ethylidene}amino]oxy]methyl)-1H-1,2,3-triazol-1-yl)benzenesulfonamide).

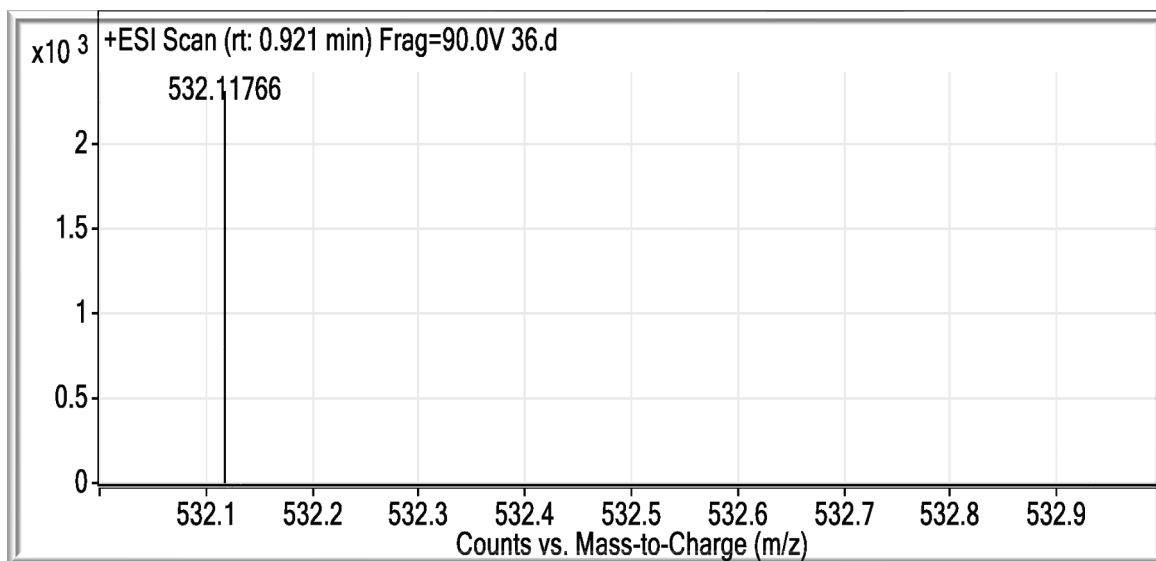

**Fig. S65.** Mass spectrum of compound **7m** (4-(4-(((1-[5-methyl-1-(4-sulfamoylphenyl)-1*H*-1,2,3-triazol-4-yl)ethylidene)amino)oxy)methyl)-1*H*-1,2,3-triazol-1-yl)benzenesulfonamide).

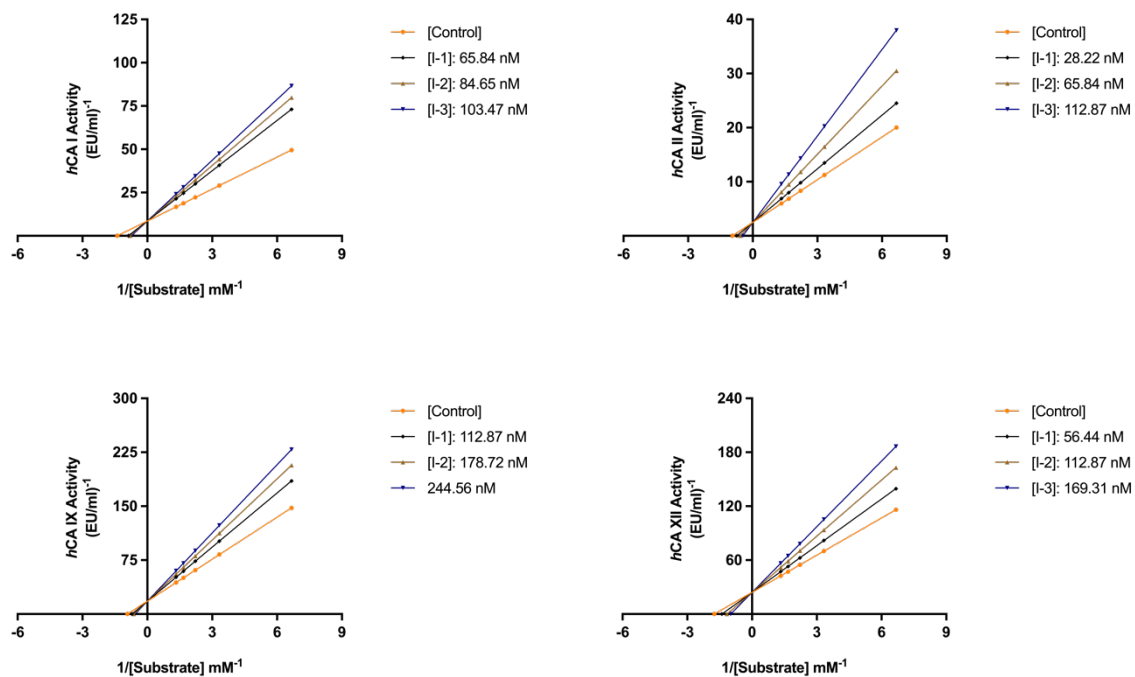

**Fig. S66.** Lineweaver-Burk plots of compound **7m** (4-(4-(((1-[5-methyl-1-(4-sulfamoylphenyl)-1*H*-1,2,3-triazol-4-yl)ethylidene)amino)oxy)methyl)-1*H*-1,2,3-triazol-1-yl)benzenesulfonamide).

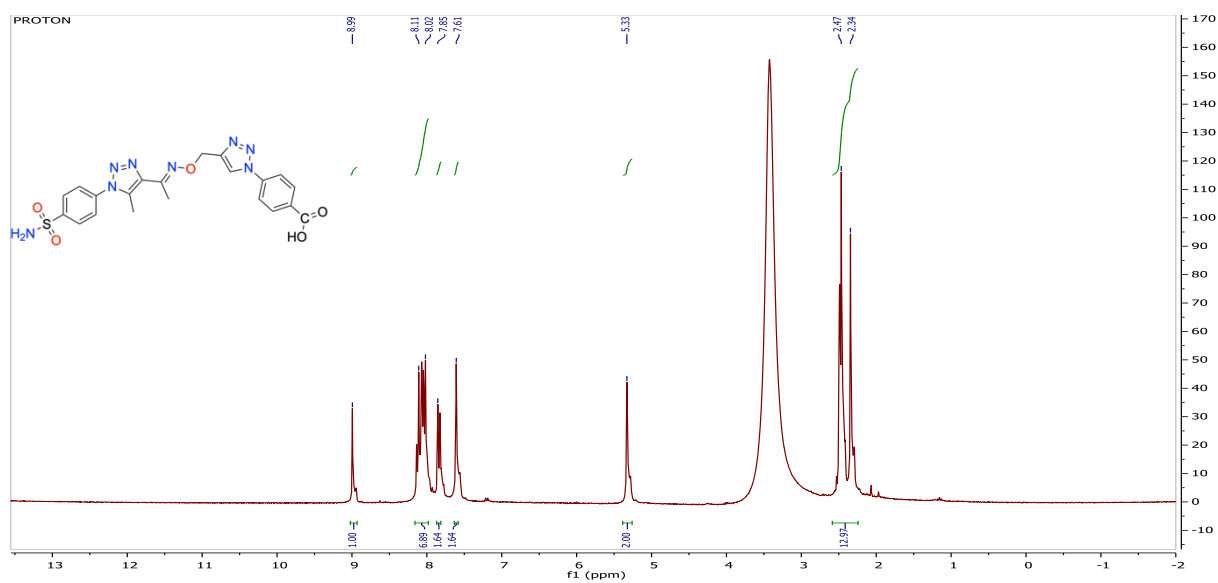

**Fig. S67.**  $^1\text{H}$  NMR spectrum (300 MHz,  $\text{DMSO-}d_6$ ) of compound **7n** (4-(4-(((1-[5-methyl-1-(4-sulfamoylphenyl)-1H-1,2,3-triazol-4-yl]ethylidene)amino)oxy)methyl)-1H-1,2,3-triazol-1-yl)benzoic acid).



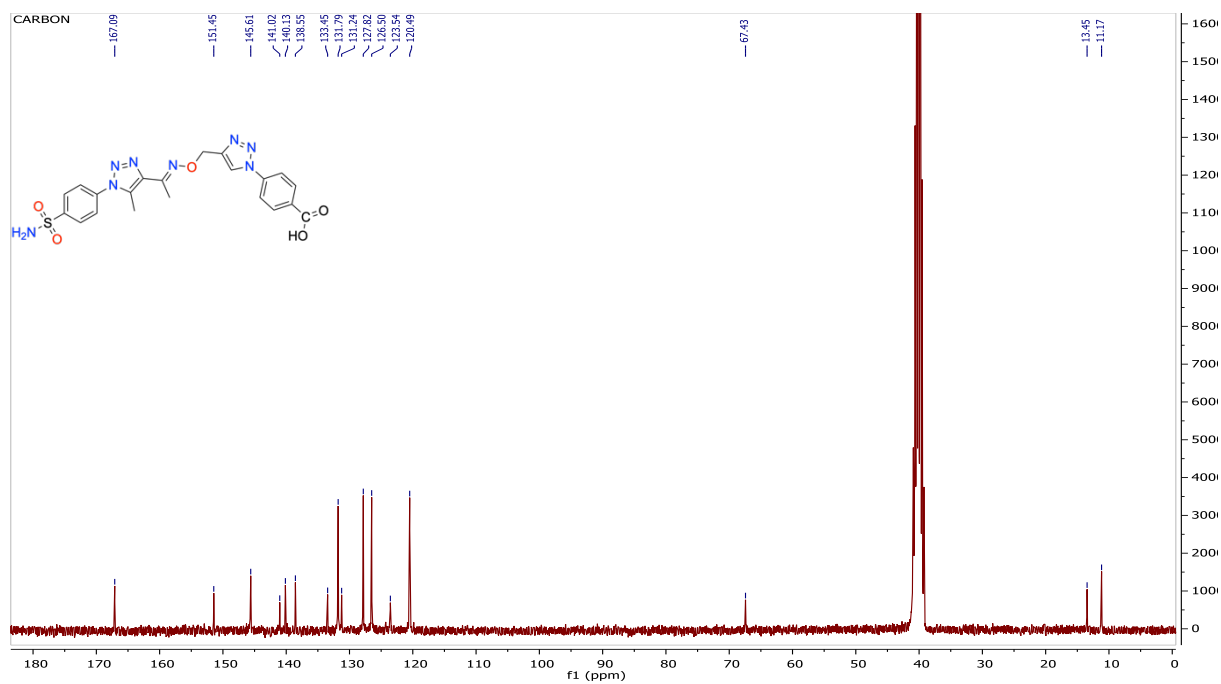

**Fig. S68.**  $^{13}\text{C}$  NMR spectrum (75 MHz,  $\text{DMSO-}d_6$ ) of compound **7n** (4-(4-(((1-[5-methyl-1-(4-sulfamoylphenyl)-1H-1,2,3-triazol-4-yl]ethylidene)amino)oxy)methyl)-1H-1,2,3-triazol-1-yl)benzoic acid).

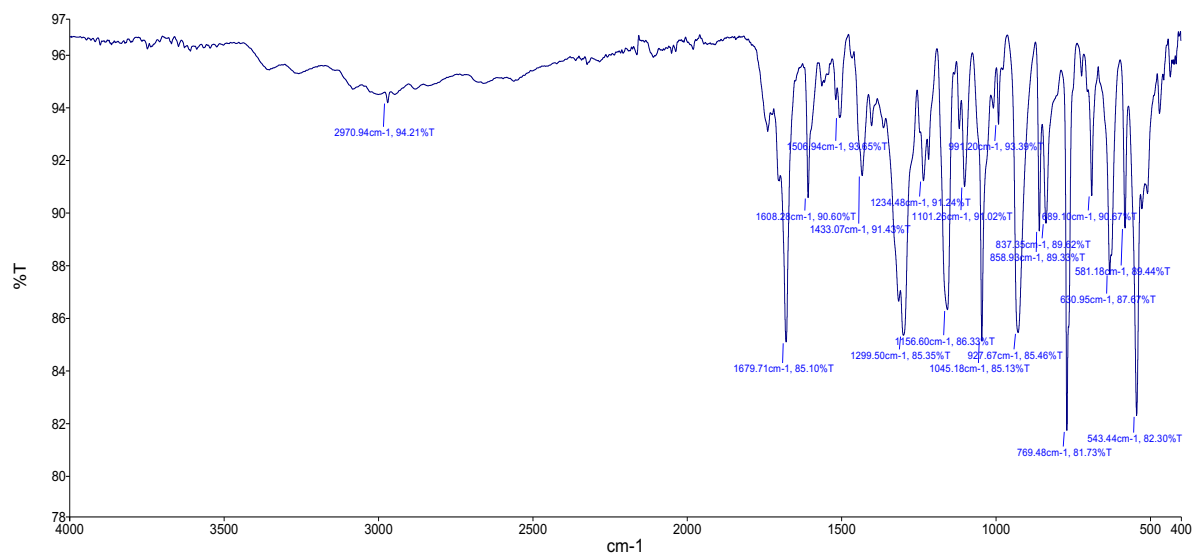

Name: C104\_1  
 Description: Sample 256 By SAU IR 1 Date Sunday, May 09 2021

**Fig. S69.** IR spectrum of compound **7n** (4-(4-[[[1-[5-methyl-1-(4-sulfamoylphenyl)-1H-1,2,3-triazol-4-yl]ethylidene]amino]oxy]methyl]-1H-1,2,3-triazol-1-yl)benzoic acid).

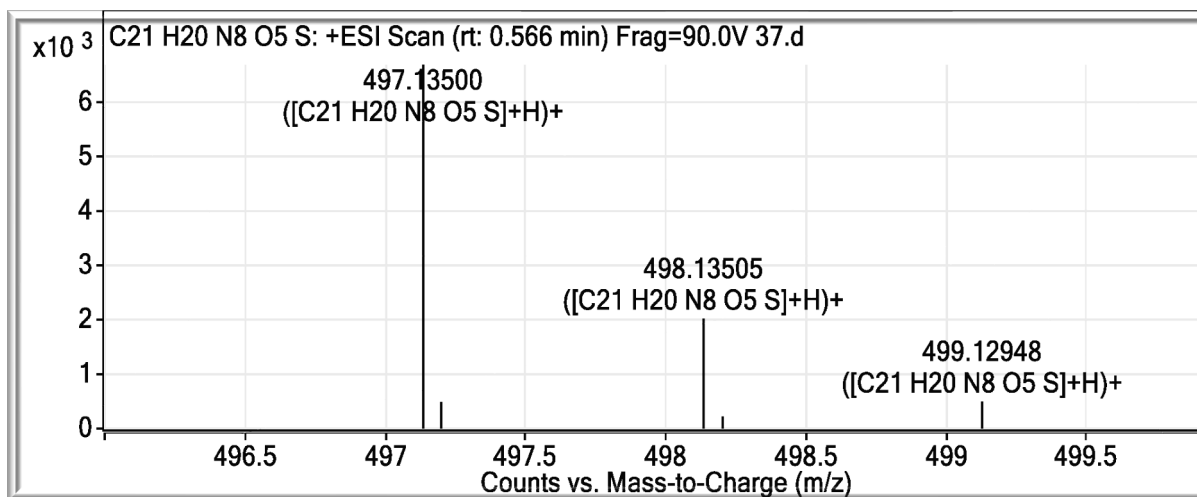

**Fig. S70.** Mass spectrum of compound **7n** (4-(4-(((1-[5-methyl-1-(4-sulfamoylphenyl)-1H-1,2,3-triazol-4-yl]ethylidene)amino)oxy)methyl)-1H-1,2,3-triazol-1-yl)benzoic acid).

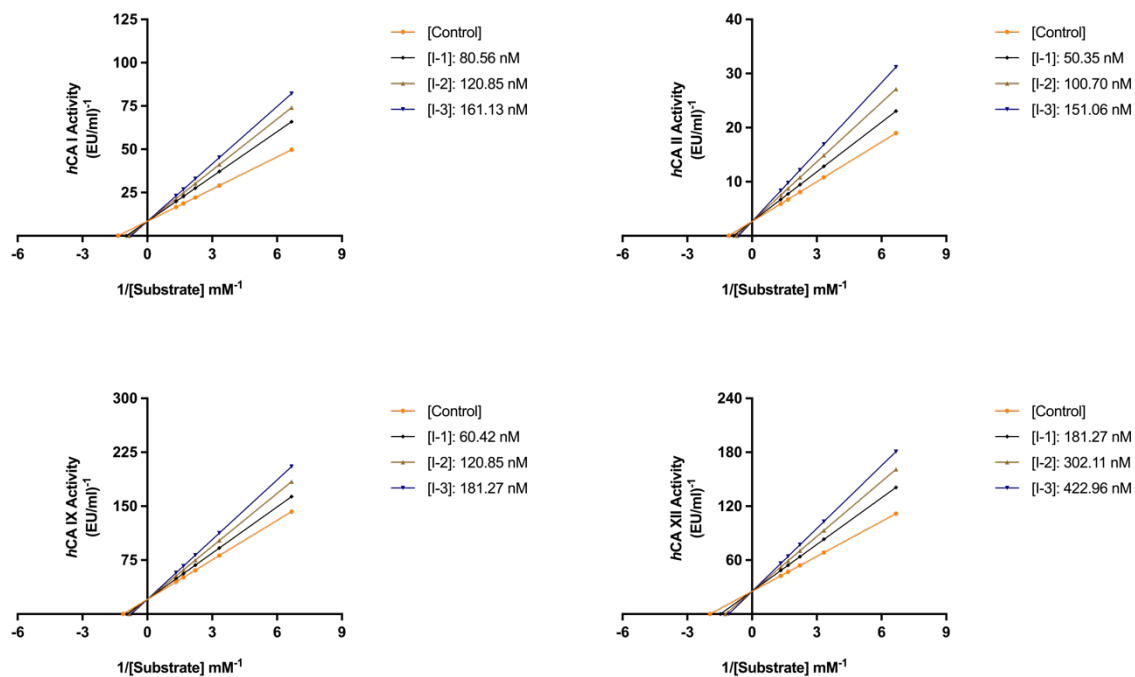

**Fig. S71.** Lineweaver-Burk plots of compound **7n** (4-(4-(((1-[5-methyl-1-(4-sulfamoylphenyl)-1*H*-1,2,3-triazol-4-yl)ethylidene)amino)oxy)methyl)-1*H*-1,2,3-triazol-1-yl)benzoic acid).

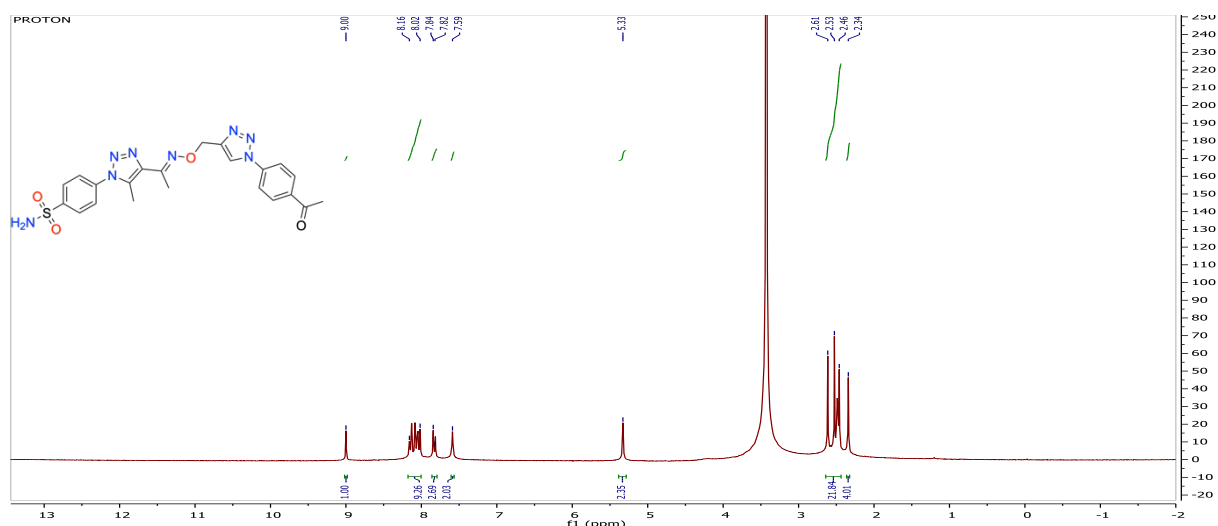

**Fig. S72.** <sup>1</sup>H NMR spectrum (300 MHz, DMSO-*d*<sub>6</sub>) of compound **7o** (4-{4-[1-({[1-(4-acetylphenyl)-1*H*-1,2,3-triazol-4-yl]methoxy)imino]ethyl]-5-methyl-1*H*-1,2,3-triazol-1-yl]benzenesulfonamide).

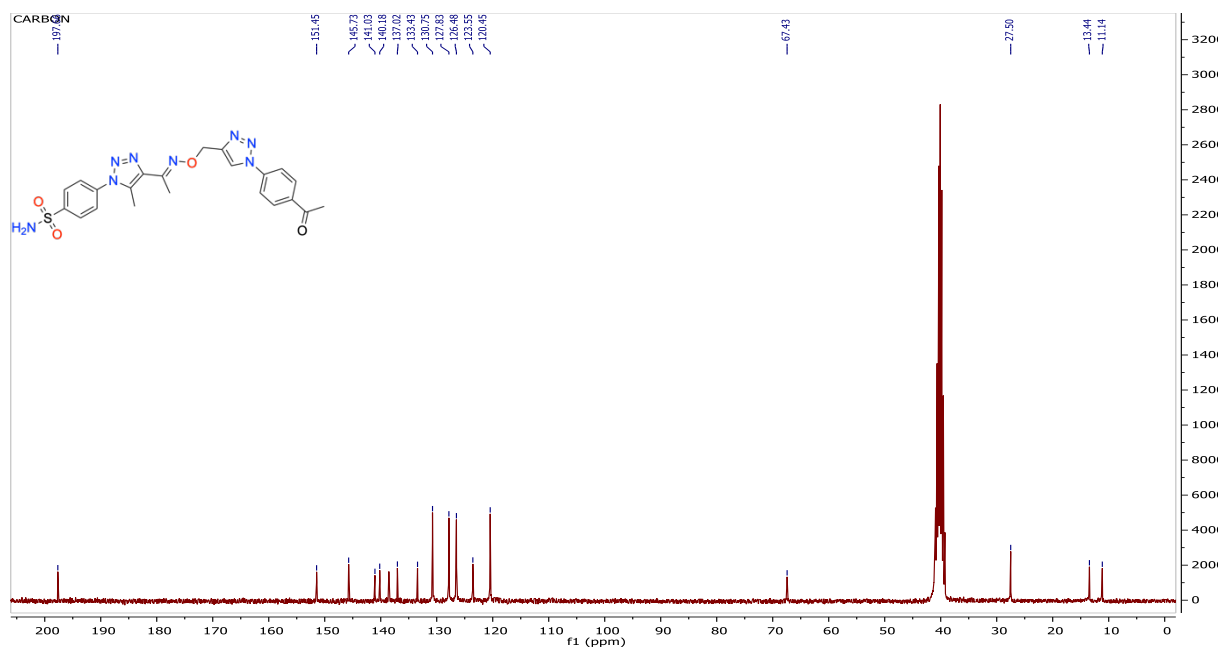

**Fig. S73.**  $^{13}\text{C}$  NMR spectrum (75 MHz,  $\text{DMSO-}d_6$ ) of compound **7o** (4-{4-[1-({[1-(4-acetylphenyl)-1*H*-1,2,3-triazol-4-yl]methoxy)imino]ethyl]-5-methyl-1*H*-1,2,3-triazol-1-yl]benzenesulfonamide).

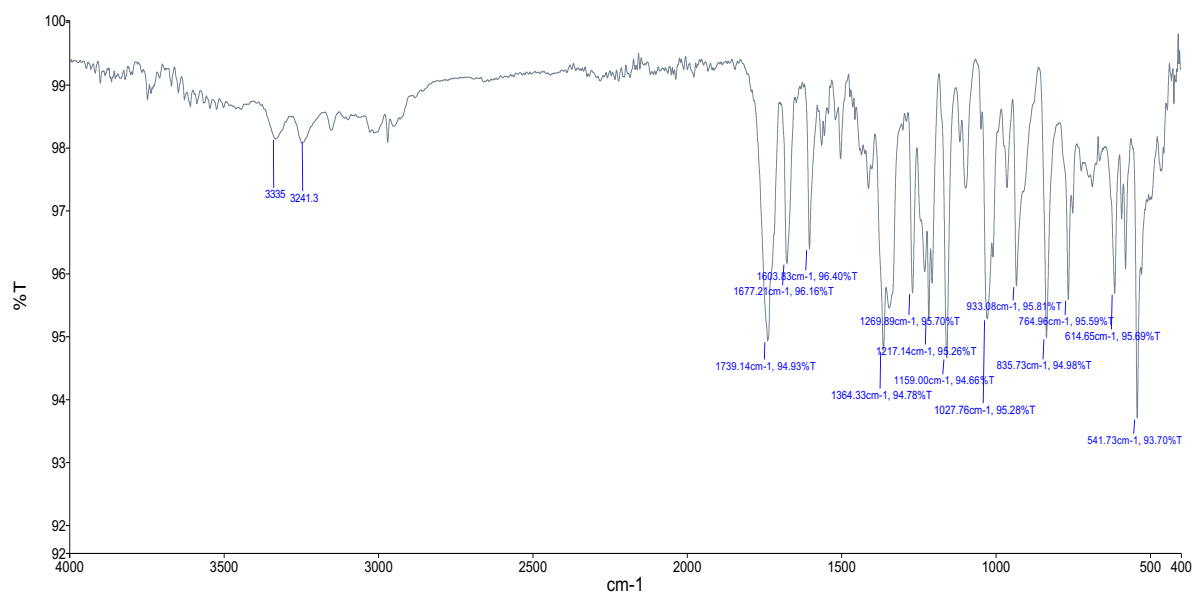

Name Description  
 C233\_1 Sample 260 By SAU IR 1 Date Sunday, May 09 2021

**Fig. S74.** IR spectrum of compound **7o** (4-{4-[1-({[1-(4-acetylphenyl)-1*H*-1,2,3-triazol-4-yl]methoxy)imino]ethyl]-5-methyl-1*H*-1,2,3-triazol-1-yl}benzenesulfonamide).

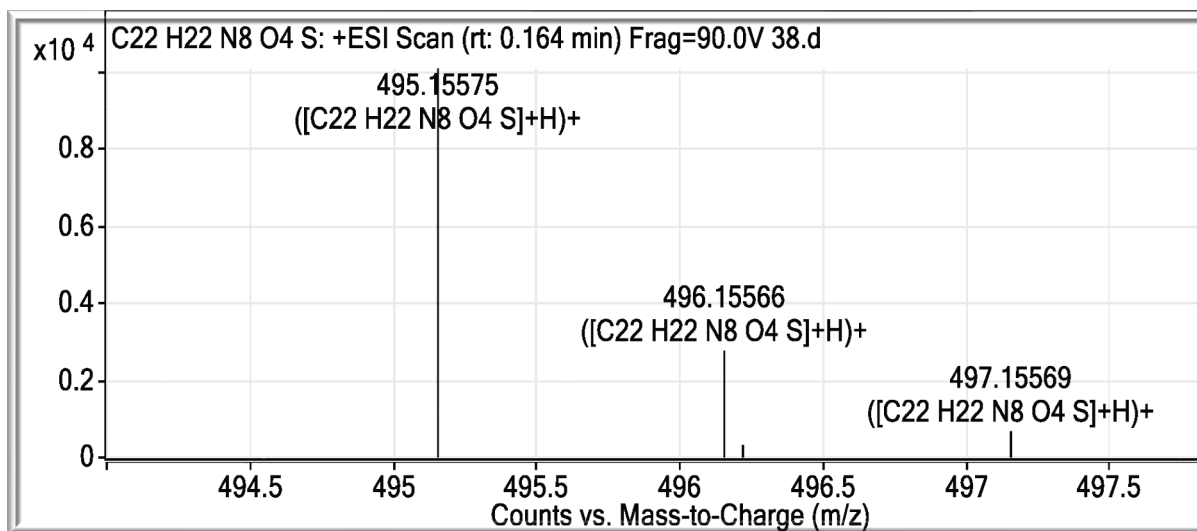

**Fig. S75.** Mass spectrum of compound **7o** (4-{4-[1-({1-(4-acetylphenyl)-1*H*-1,2,3-triazol-4-yl)methoxy}imino)ethyl]-5-methyl-1*H*-1,2,3-triazol-1-yl}benzenesulfonamide).



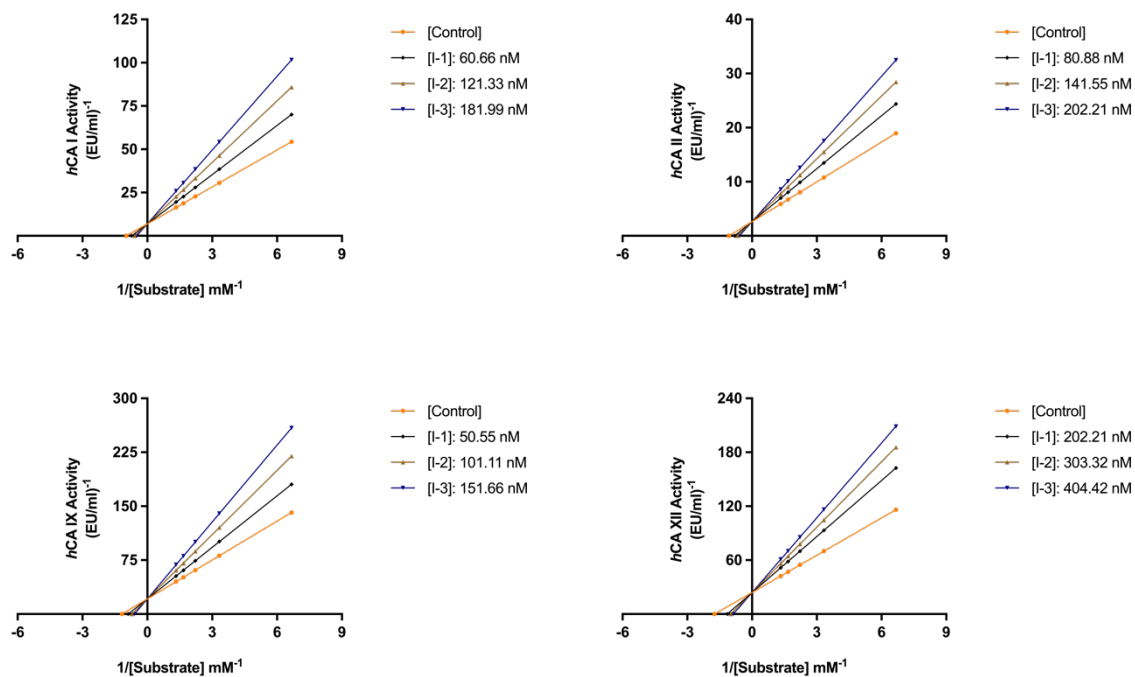

**Fig. S76.** Lineweaver-Burk plots of compound **7o** (4-{4-[1-({[1-(4-acetylphenyl)-1*H*-1,2,3-triazol-4-yl]methoxy}imino)ethyl]-5-methyl-1*H*-1,2,3-triazol-1-yl}benzenesulfonamide).
